# Supplementary material for: A Novel Model for Predicting Associations between Diseases and LncRNA-miRNA Pairs Based on a Newly Constructed Bipartite Network
Source: Comput Math Methods Med. 2018 May 6;2018:6789089. doi: 10.1155/2018/6789089 (PMC5960578; doi:10.1155/2018/6789089)
Supplement: Supplementary Materials — There are four supplementary tables in this manuscript. And among them, Supplementary Table 1 is a description of the lncRNA-disease associations, in which there are 2048 lncRNA-disease associations included, and the 1st column represents the lncRNAs and the 2nd column represents the diseases. Supplementary Table 2 is a description of the miRNA-disease associations, which contains the ID of diseases, the ID of miRNAs, and the associations between diseases and miRNAs. Supplementary Table 3 is a description of the lncRNA-miRNA associations, which contains 20343 lncRNA-miRNA associations and in which the first column represents the lncRNAs and the second column represents the miRNAs. Supplementary Table 4 is a description of the predictive results of associations between diseases and lncRNA-miRNA pairs while adopting PADLMP to execute prediction. [file 6789089.f1.zip]

Archive with 5 entries (4 files):
- Supplementary Materials/
- Supplementary Materials/Supplementary File 2.xlsx
- Supplementary Materials/Supplementary File 3.xlsx
- Supplementary Materials/Supplementary File 4.xlsx
- Supplementary Materials/Supplementary File1.xlsx
