# Supplementary material for: A Novel Model for Predicting Associations between Diseases and LncRNA-miRNA Pairs Based on a Newly Constructed Bipartite Network
Source: Comput Math Methods Med. 2018 May 6;2018:6789089. doi: 10.1155/2018/6789089 (PMC5960578; doi:10.1155/2018/6789089)
Supplement: Supplementary Materials — There are four supplementary tables in this manuscript. And among them, Supplementary Table 1 is a description of the lncRNA-disease associations, in which there are 2048 lncRNA-disease associations included, and the 1st column represents the lncRNAs and the 2nd column represents the diseases. Supplementary Table 2 is a description of the miRNA-disease associations, which contains the ID of diseases, the ID of miRNAs, and the associations between diseases and miRNAs. Supplementary Table 3 is a description of the lncRNA-miRNA associations, which contains 20343 lncRNA-miRNA associations and in which the first column represents the lncRNAs and the second column represents the miRNAs. Supplementary Table 4 is a description of the predictive results of associations between diseases and lncRNA-miRNA pairs while adopting PADLMP to execute prediction. [file 6789089.f1.zip › Supplementary Materials/Supplementary File 2.xlsx]

## Sheet: diseases
disease id	disease DO id	disease name
1	DOID:0050710	3-Methylcrotonyl-CoA carboxylase deficiency
2	DOID:14450	46 XX gonadal dysgenesis
3	DOID:14448	46 XY gonadal dysgenesis
4	DOID:0050600	ABCD syndrome
5	DOID:7004	ACTH-secreting pituitary adenoma
6	DOID:0050601	ADULT syndrome
7	DOID:0050712	AGAT deficiency
8	DOID:1305	AIDS dementia complex
9	DOID:1308	AIDS related complex
10	DOID:6691	Aagenaes syndrome
11	DOID:6683	Aarskog-Scott syndrome
12	DOID:13774	Addison's disease
13	DOID:8461	Aicardi syndrome
14	DOID:0050629	Aicardi-Goutieres syndrome
15	DOID:9245	Alagille syndrome
16	DOID:0050630	Aland Island eye disease
17	DOID:0080053	Albright's hereditary osteodystrophy
18	DOID:4252	Alexander disease
19	DOID:0050631	Allan-Herndon-Dudley syndrome
20	DOID:1442	Alpers syndrome
21	DOID:5029	Alphavirus infectious disease
22	DOID:10983	Alport syndrome
23	DOID:0050473	Alstrom syndrome
24	DOID:10652	Alzheimer's disease
25	DOID:0050434	Andersen-Tawil syndrome
26	DOID:1932	Angelman syndrome
27	DOID:0050462	Antley-Bixler syndrome
28	DOID:3944	Arenaviridae infectious disease
29	DOID:0050647	Arts syndrome
30	DOID:0050432	Asperger syndrome
31	DOID:0050682	Athabaskan brainstem dysgenesis syndrome
32	DOID:14686	Axenfeld-Rieger syndrome
33	DOID:3052	Balkan nephropathy
34	DOID:0050654	Baller-Gerold syndrome
35	DOID:0050655	Bamforth-Lazarus syndrome
36	DOID:0050657	Bannayan-Riley-Ruvalcaba syndrome
37	DOID:1935	Bardet-Biedl syndrome
38	DOID:9206	Barrett's esophagus
39	DOID:0050658	Bart-Pumphrey syndrome
40	DOID:0050476	Barth syndrome
41	DOID:11102	Bartonella infectious disease
42	DOID:445	Bartter disease
43	DOID:6808	Basaloid follicular hamartoma
44	DOID:0050660	Beare-Stevenson cutis gyrata syndrome
45	DOID:9883	Becker muscular dystrophy
46	DOID:5572	Beckwith-Wiedemann syndrome
47	DOID:13241	Behcet's disease
48	DOID:2217	Bernard-Soulier syndrome
49	DOID:0050663	Bethlem myopathy
50	DOID:0050664	Bietti crystalline corneoretinal dystrophy
51	DOID:0050675	Birk-Barel syndrome
52	DOID:0050676	Birt-Hogg-Dube syndrome
53	DOID:0050677	Bjornstad syndrome
54	DOID:0050678	Blau syndrome
55	DOID:12305	Bloch-Sulzberger syndrome
56	DOID:0050680	Boomerang dysplasia
57	DOID:0050681	Borjeson-Forssman-Lehmann syndrome
58	DOID:0050683	Bothnia retinal dystrophy
59	DOID:0050684	Bowen-Conradi syndrome
60	DOID:0050692	Brody myopathy
61	DOID:0050693	Brooke-Spiegler syndrome
62	DOID:10235	Brown's tendon sheath syndrome
63	DOID:0050694	Brown-Vialetto-Van Laere syndrome
64	DOID:14457	Brucella abortus brucellosis
65	DOID:0050451	Brugada syndrome
66	DOID:14179	Bruton-type agammaglobulinemia
67	DOID:0050377	Burkholderia cepacia complex infectious disease
68	DOID:8584	Burkitt's lymphoma
69	DOID:0050456	Buruli ulcer disease
70	DOID:0060002	C1 inhibitor deficiency
71	DOID:928	CNS metastases
72	DOID:4257	Caffey disease
73	DOID:4091	Caliciviridae infectious disease
74	DOID:4997	Camurati-Engelmann disease
75	DOID:3613	Canavan disease
76	DOID:3667	Cardiovirus infectious disease
77	DOID:0050471	Carney complex
78	DOID:12569	Chagas cardiomyopathy
79	DOID:12140	Chagas disease
80	DOID:0050543	Charcot-Marie-Tooth disease intermediate type
81	DOID:0050538	Charcot-Marie-Tooth disease type 1
82	DOID:0050539	Charcot-Marie-Tooth disease type 2
83	DOID:0050540	Charcot-Marie-Tooth disease type 3
84	DOID:0050541	Charcot-Marie-Tooth disease type 4
85	DOID:0050542	Charcot-Marie-Tooth disease type X
86	DOID:10595	Charcot-Marie-Tooth disease
87	DOID:2935	Chediak-Higashi syndrome
88	DOID:11263	Chlamydia trachomatis infectious disease
89	DOID:11264	Chlamydophila infectious disease
90	DOID:3049	Churg-Strauss syndrome
91	DOID:14693	Clouston syndrome
92	DOID:7765	Coats disease
93	DOID:2962	Cockayne syndrome
94	DOID:3783	Coffin-Lowry syndrome
95	DOID:1925	Coffin-Siris syndrome
96	DOID:12028	Conn's syndrome
97	DOID:11725	Cornelia de Lange syndrome
98	DOID:2948	Coronaviridae infectious disease
99	DOID:0050469	Costello syndrome
100	DOID:6457	Cowden disease
101	DOID:11949	Creutzfeldt-Jakob syndrome
102	DOID:12580	Cri-Du-Chat syndrome
103	DOID:3803	Crigler-Najjar syndrome
104	DOID:12287	Crimean-Congo hemorrhagic fever
105	DOID:8778	Crohn's disease
106	DOID:6225	Cronkhite-Canada syndrome
107	DOID:2339	Crouzon syndrome
108	DOID:12252	Cushing's syndrome
109	DOID:11259	Cytomegalovirus infectious disease
110	DOID:0050575	D-2-hydroxyglutaric aciduria
111	DOID:0060021	DNA ligase IV deficiency
112	DOID:2961	DNA repair deficiency
113	DOID:937	DNA virus infectious disease
114	DOID:2785	Dandy-Walker syndrome
115	DOID:0050437	Danon disease
116	DOID:616	Deltaretrovirus infectious disease
117	DOID:3764	Denys-Drash syndrome
118	DOID:11198	DiGeorge syndrome
119	DOID:1339	Diamond-Blackfan anemia
120	DOID:0050470	Donohue Syndrome
121	DOID:14250	Down syndrome
122	DOID:0060171	Dravet Syndrome
123	DOID:12557	Duane retraction syndrome
124	DOID:12308	Dubin-Johnson syndrome
125	DOID:11723	Duchenne muscular dystrophy
126	DOID:4325	Ebola hemorrhagic fever
127	DOID:1085	Edwards syndrome
128	DOID:13359	Ehlers-Danlos syndrome
129	DOID:12714	Ellis-Van Creveld syndrome
130	DOID:11726	Emery-Dreifuss muscular dystrophy
131	DOID:4808	Enterovirus infectious disease
132	DOID:2938	Epstein-Barr virus infectious disease
133	DOID:14711	FG syndrome
134	DOID:14499	Fabry disease
135	DOID:1062	Fanconi syndrome
136	DOID:13636	Fanconi's anemia
137	DOID:0050464	Farber lipogranulomatosis
138	DOID:11042	Felty's syndrome
139	DOID:12180	Fetal Macrosomia
140	DOID:0050637	Finnish type amyloidosis
141	DOID:1886	Flaviviridae infectious disease
142	DOID:993	Flavivirus infectious disease
143	DOID:14555	Foster-Kennedy syndrome
144	DOID:0050438	Frasier syndrome
145	DOID:12705	Friedreich ataxia
146	DOID:6676	Froelich's syndrome
147	DOID:11555	Fuchs' endothelial dystrophy
148	DOID:9375	Fuchs' heterochromic uveitis
149	DOID:0050559	Fukuyama congenital muscular dystrophy
150	DOID:0060174	GABA aminotransferase deficiency
151	DOID:1926	Gaucher's disease
152	DOID:4249	Gerstmann-Straussler-Scheinker disease
153	DOID:2739	Gilbert syndrome
154	DOID:11119	Gilles de la Tourette syndrome
155	DOID:0050450	Gitelman syndrome
156	DOID:2219	Glanzmann's thrombasthenia
157	DOID:2907	Goldenhar syndrome
158	DOID:9808	Goodpasture syndrome
159	DOID:12361	Graves' disease
160	DOID:14761	Greig cephalopolysyndactyly syndrome
161	DOID:12842	Guillain-Barre syndrome
162	DOID:13133	HELLP syndrome
163	DOID:1306	HIV encephalopathy
164	DOID:7555	HIV leukoencephalopathy
165	DOID:1313	HIV wasting syndrome
166	DOID:810	HIV-associated lipodystrophy syndrome
167	DOID:1311	HIV-associated nephropathy
168	DOID:0050429	Hailey-Hailey disease
169	DOID:2736	Hajdu-Cheney syndrome
170	DOID:4534	Hallermann-Streiff syndrome
171	DOID:3981	Hallervorden-Spatz syndrome
172	DOID:2880	Hantavirus infectious disease
173	DOID:1060	Hartnup disease
174	DOID:4036	Helicobacter pylori gastritis
175	DOID:3686	Helicobacter pylori infectious disease
176	DOID:11123	Henoch-Schoenlein purpura
177	DOID:3753	Hermansky-Pudlak syndrome
178	DOID:9059	Herpes simplex virus gingivostomatitis
179	DOID:9195	Herpes simplex virus keratitis
180	DOID:9141	Herpes simplex virus meningoencephalitis
181	DOID:2939	Herpesviridae infectious disease
182	DOID:10487	Hirschsprung's disease
183	DOID:8651	Hodgkin's granuloma
184	DOID:8628	Hodgkin's lymphoma, lymphocytic depletion
185	DOID:8543	Hodgkin's lymphoma, lymphocytic-histiocytic predominance
186	DOID:8654	Hodgkin's lymphoma, mixed cellularity
187	DOID:8838	Hodgkin's lymphoma, nodular sclerosis
188	DOID:8567	Hodgkin's lymphoma
189	DOID:323	Human T-lymphotropic virus 1 infectious disease
190	DOID:716	Human T-lymphotropic virus 2 infectious disease
191	DOID:526	Human immunodeficiency virus infectious disease
192	DOID:12858	Huntington's disease
193	DOID:2986	IgA glomerulonephritis
194	DOID:0050553	JMP syndrome
195	DOID:0080020	Jansen's metaphyseal chondrodysplasia
196	DOID:10844	Japanese encephalitis
197	DOID:2842	Jervell-Lange Nielsen syndrome
198	DOID:3261	Job's syndrome
199	DOID:14694	Johanson-Blizzard syndrome
200	DOID:14780	KBG syndrome
201	DOID:3614	Kallmann syndrome
202	DOID:8632	Kaposi's sarcoma
203	DOID:0050144	Kartagener syndrome
204	DOID:13378	Kawasaki disease
205	DOID:12934	Kearns-Sayre syndrome
206	DOID:0060161	Kennedy's disease
207	DOID:1921	Klinefelter's syndrome
208	DOID:10426	Klippel-Feil syndrome
209	DOID:2926	Klippel-Trenaunay syndrome
210	DOID:0080045	Kniest dysplasia
211	DOID:10587	Krabbe disease
212	DOID:10873	Kuhnt-Junius degeneration
213	DOID:0050574	L-2-hydroxyglutaric aciduria
214	DOID:0050331	LADD syndrome
215	DOID:14291	LEOPARD syndrome
216	DOID:3534	Lafora disease
217	DOID:0050214	Lambert-Eaton myasthenic syndrome
218	DOID:4998	Langer-Giedion syndrome
219	DOID:7146	Langerhans cell sarcoma
220	DOID:2571	Langerhans-cell histiocytosis
221	DOID:9521	Laron syndrome
222	DOID:14764	Larsen syndrome
223	DOID:9537	Lassa fever
224	DOID:14791	Leber congenital amaurosis
225	DOID:14415	Legg-Calve-Perthes Disease
226	DOID:10457	Legionnaires' disease
227	DOID:3652	Leigh disease
228	DOID:0050561	Lennox-Gastaut syndrome
229	DOID:1919	Lesch-Nyhan syndrome
230	DOID:2554	Letterer-Siwe disease
231	DOID:12217	Lewy body dementia
232	DOID:2696	Leydig cell tumor
233	DOID:3012	Li-Fraumeni syndrome
234	DOID:0050477	Liddle syndrome
235	DOID:396	Loeffler endocarditis
236	DOID:9503	Loeffler syndrome
237	DOID:0050466	Loeys-Dietz syndrome
238	DOID:11729	Lyme disease
239	DOID:3883	Lynch syndrome
240	DOID:3687	MELAS syndrome
241	DOID:310	MERRF syndrome
242	DOID:0060009	MHC class I deficiency
243	DOID:5812	MHC class II deficiency
244	DOID:1440	Machado-Joseph disease
245	DOID:0050550	Majewski syndrome
246	DOID:14323	Marfan syndrome
247	DOID:1858	McCune Albright Syndrome
248	DOID:0080022	McKusick type metaphyseal dysplasia
249	DOID:1761	Melkersson-Rosenthal syndrome
250	DOID:9849	Meniere's disease
251	DOID:1838	Menkes disease
252	DOID:13501	Mobius syndrome
253	DOID:13099	Moyamoya disease
254	DOID:0050465	Muir-Torre syndrome
255	DOID:10309	Mumps virus meningitis
256	DOID:2755	Mycobacterium avium complex disease
257	DOID:2757	Mycobacterium infectious disease
258	DOID:13276	Mycoplasma pneumoniae pneumonia
259	DOID:5768	Nager syndrome
260	DOID:4968	Nelson syndrome
261	DOID:0050474	Netherton syndrome
262	DOID:14504	Niemann-Pick disease
263	DOID:7400	Nijmegen breakage syndrome
264	DOID:3490	Noonan syndrome
265	DOID:1391	Norum disease
266	DOID:0050709	Ohtahara syndrome
267	DOID:4624	Ollier disease
268	DOID:0060010	Omenn syndrome
269	DOID:0050722	PHGDH deficiency
270	DOID:0050723	PSAT deficiency
271	DOID:5408	Paget's disease of bone
272	DOID:9248	Pallister-Hall syndrome
273	DOID:3389	Papillon-Lefevre disease
274	DOID:3056	Paramyxoviridae infectious disease
275	DOID:14330	Parkinson's disease
276	DOID:14744	Partington syndrome
277	DOID:9631	Pelger-Huet anomaly
278	DOID:3210	Pelizaeus-Merzbacher disease
279	DOID:3852	Peutz-Jeghers syndrome
280	DOID:8616	Peyronie's disease
281	DOID:14705	Pfeiffer syndrome
282	DOID:11870	Pick's disease
283	DOID:3668	Picornaviridae infectious disease
284	DOID:14067	Plasmodium falciparum malaria
285	DOID:12978	Plasmodium vivax malaria
286	DOID:11340	Pneumocystis infectious disease
287	DOID:647	Polyomavirus infectious disease
288	DOID:0050179	Powassan encephalitis
289	DOID:11983	Prader-Willi syndrome
290	DOID:11711	Pregnancy in Diabetics
291	DOID:13482	Proteus syndrome
292	DOID:11100	Q fever
293	DOID:9091	REM sleep behavior disorder
294	DOID:1301	RNA virus infectious disease
295	DOID:10300	Raynaud disease
296	DOID:10582	Refsum disease
297	DOID:0060179	Renpenning syndrome
298	DOID:1334	Reoviridae infectious disease
299	DOID:617	Retroviridae infectious disease
300	DOID:1206	Rett syndrome
301	DOID:0050641	Rh deficiency syndrome
302	DOID:4175	Rh isoimmunization
303	DOID:11589	Riley-Day syndrome
304	DOID:5325	Roberts syndrome
305	DOID:5120	Roseolovirus infectious disease
306	DOID:4887	Rotavirus infectious disease
307	DOID:2732	Rothmund-Thomson syndrome
308	DOID:1933	Rubinstein-Taybi syndrome
309	DOID:13677	SAPHO syndrome
310	DOID:0050536	SC phocomelia syndrome
311	DOID:0080036	SOST-related sclerosing bone dysplasia
312	DOID:14768	Saethre-Chotzen syndrome
313	DOID:11092	Salmonella gastroenteritis
314	DOID:1466	Salmonella infectious disease
315	DOID:3323	Sandhoff disease
316	DOID:0080021	Schmid metaphyseal chondrodysplasia
317	DOID:4371	Schnitzler syndrome
318	DOID:11446	Sciatic Neuropathy
319	DOID:0050569	Seckel syndrome
320	DOID:0050576	Senior-Loken syndrome
321	DOID:0050577	Sensenbrenner syndrome
322	DOID:3577	Sertoli cell tumor
323	DOID:0050457	Sertoli cell-only syndrome
324	DOID:2997	Sertoli-Leydig cell tumor
325	DOID:8541	Sezary's disease
326	DOID:9476	Sheehan syndrome
327	DOID:14681	Silver-Russell syndrome
328	DOID:0050430	Sipple syndrome
329	DOID:12894	Sjogren's syndrome
330	DOID:14501	Sjogren-Larsson syndrome
331	DOID:14692	Smith-Lemli-Opitz syndrome
332	DOID:13096	Sneddon syndrome
333	DOID:14748	Sotos syndrome
334	DOID:0050426	Stevens-Johnson syndrome
335	DOID:0080046	Stickler syndrome
336	DOID:13366	Stiff-Person syndrome
337	DOID:0050552	Sugio-Kaji syndrome
338	DOID:5602	T-cell adult acute lymphocytic leukemia
339	DOID:715	T-cell leukemia
340	DOID:2508	Takayasu's arteritis
341	DOID:1388	Tangier disease
342	DOID:4795	Tay-Sachs disease AB variant
343	DOID:3320	Tay-Sachs disease
344	DOID:9346	Taylor's syndrome
345	DOID:2106	Thomsen disease
346	DOID:0060173	Timothy syndrome
347	DOID:1257	Transient hypertension of pregnancy
348	DOID:2908	Treacher Collins syndrome
349	DOID:3491	Turner's syndrome
350	DOID:0050558	Ullrich congenital muscular dystrophy
351	DOID:3535	Unverricht-Lundborg syndrome
352	DOID:3100	Ureaplasma urealyticum urethritis
353	DOID:0050439	Usher syndrome
354	DOID:14679	VACTERL association
355	DOID:5574	VIPoma
356	DOID:9584	Venezuelan equine encephalitis
357	DOID:0050551	Verma-Naumoff syndrome
358	DOID:12297	Vogt-Koyanagi-Harada disease
359	DOID:14515	WAGR syndrome
360	DOID:9258	Waardenburg's syndrome
361	DOID:10016	Wagenmann-Froboese syndrome
362	DOID:0050560	Walker-Warburg syndrome
363	DOID:9931	Waterhouse-Friderichsen syndrome
364	DOID:14731	Weaver syndrome
365	DOID:12132	Wegener's granulomatosis
366	DOID:0050475	Weill-Marchesani syndrome
367	DOID:4258	Weissenbacher-Zweymuller syndrome
368	DOID:13137	Werdnig-Hoffmann disease
369	DOID:10017	Wermer syndrome
370	DOID:5688	Werner syndrome
371	DOID:2384	Wernicke encephalopathy
372	DOID:10915	Wernicke-Korsakoff syndrome
373	DOID:2365	West Nile encephalitis
374	DOID:2366	West Nile fever
375	DOID:4121	West Nile virus infectious disease
376	DOID:0050562	West syndrome
377	DOID:8476	Whipple disease
378	DOID:1928	Williams-Beuren syndrome
379	DOID:893	Wilson disease
380	DOID:9169	Wiskott-Aldrich syndrome
381	DOID:0050460	Wolf-Hirschhorn syndrome
382	DOID:384	Wolff-Parkinson-White syndrome
383	DOID:10632	Wolfram syndrome
384	DOID:6620	X-linked hyper IgM syndrome
385	DOID:0050445	X-linked hypophosphatemia
386	DOID:1700	X-linked ichthyosis
387	DOID:0050566	X-linked nonsyndromic deafness
388	DOID:0050554	X-linked sideroblastic anemia with ataxia
389	DOID:0060063	X-linked sideroblastic anemia
390	DOID:3300	Yersinia infectious disease
391	DOID:905	Zellweger syndrome
392	DOID:7693	abdominal aortic aneurysm
393	DOID:122	abdominal cancer
394	DOID:1386	abetalipoproteinemia
395	DOID:11518	abnormal pupillary function
396	DOID:3138	acanthosis nigricans
397	DOID:2582	acatalasia
398	DOID:0050711	aceruloplasminemia
399	DOID:9164	achalasia
400	DOID:0050603	acheiropody
401	DOID:0080054	achondrogenesis type IA
402	DOID:0080055	achondrogenesis type IB
403	DOID:0080056	achondrogenesis type II
404	DOID:4480	achondroplasia
405	DOID:13911	achromatopsia
406	DOID:5392	acidophil adenoma
407	DOID:3025	acinar cell carcinoma
408	DOID:6543	acne
409	DOID:12689	acoustic neuroma
410	DOID:13912	acquired color blindness
411	DOID:12135	acquired factor VIII deficiency
412	DOID:635	acquired immunodeficiency syndrome
413	DOID:2834	acquired polycythemia
414	DOID:9250	acrocallosal syndrome
415	DOID:0050604	acrocapitofemoral dysplasia
416	DOID:12960	acrocephalosyndactylia
417	DOID:0050605	acrodermatitis enteropathica
418	DOID:2722	acrodermatitis
419	DOID:14669	acrodysostosis
420	DOID:0050606	acrokeratosis verruciformis
421	DOID:2449	acromegaly
422	DOID:0080052	acromesomelic dysplasia, Grebe type
423	DOID:0080051	acromesomelic dysplasia, Hunter-Thompson type
424	DOID:0080050	acromesomelic dysplasia, Maroteaux type
425	DOID:0050525	acroosteolysis
426	DOID:8866	actinic keratosis
427	DOID:8478	actinomycosis
428	DOID:5603	acute T cell leukemia
429	DOID:3890	acute intermittent porphyria
430	DOID:2800	acute interstitial pneumonia
431	DOID:3021	acute kidney failure
432	DOID:12556	acute kidney tubular necrosis
433	DOID:12603	acute leukemia
434	DOID:9952	acute lymphocytic leukemia
435	DOID:8864	acute monocytic leukemia
436	DOID:9119	acute myeloid leukemia
437	DOID:9408	acute myocardial infarction
438	DOID:2913	acute pancreatitis
439	DOID:3133	acute porphyria
440	DOID:559	acute pyelonephritis
441	DOID:6088	acute stress disorder
442	DOID:4943	adenocarcinoma in situ
443	DOID:299	adenocarcinoma
444	DOID:2683	adenofibroma
445	DOID:4866	adenoid cystic carcinoma
446	DOID:746	adenomatoid tumor
447	DOID:657	adenoma
448	DOID:2609	adenomyoma
449	DOID:4830	adenosquamous carcinoma
450	DOID:0050298	adenovirus infectious disease
451	DOID:507	adjustment disorder
452	DOID:656	adrenal adenoma
453	DOID:660	adrenal cortex cancer
454	DOID:3952	adrenal cortex disease
455	DOID:10493	adrenal cortical hypofunction
456	DOID:3953	adrenal gland cancer
457	DOID:3947	adrenal gland hyperfunction
458	DOID:9552	adrenal gland hypofunction
459	DOID:4967	adrenal hyperplasia
460	DOID:1786	adrenal rest tumor
461	DOID:3948	adrenocortical carcinoma
462	DOID:10588	adrenoleukodystrophy
463	DOID:0050523	adult T-cell leukemia
464	DOID:5604	adult acute lymphocytic leukemia
465	DOID:3864	adult medulloblastoma
466	DOID:3186	adult oligodendroglioma
467	DOID:11394	adult respiratory distress syndrome
468	DOID:4224	adult soft tissue sarcoma
469	DOID:0050529	adult spinal muscular atrophy
470	DOID:14256	adult-onset Still's disease
471	DOID:0050628	advanced sleep phase syndrome
472	DOID:2583	agammaglobulinemia
473	DOID:10871	age related macular degeneration
474	DOID:1474	aggressive periodontitis
475	DOID:4798	aggressive systemic mastocytosis
476	DOID:593	agoraphobia
477	DOID:12987	agranulocytosis
478	DOID:4375	agricultural workers' disease
479	DOID:0050714	alcaptonuria
480	DOID:1574	alcohol abuse
481	DOID:8639	alcohol withdrawal delirium
482	DOID:12935	alcoholic cardiomyopathy
483	DOID:12351	alcoholic hepatitis
484	DOID:14018	alcoholic liver cirrhosis
485	DOID:14183	alcoholic neuropathy
486	DOID:4988	alcoholic pancreatitis
487	DOID:252	alcoholic psychosis
488	DOID:13417	alexia
489	DOID:0060131	alexithymia
490	DOID:9270	alkaptonuria
491	DOID:9415	allergic asthma
492	DOID:13166	allergic bronchopulmonary aspergillosis
493	DOID:11204	allergic conjunctivitis
494	DOID:3042	allergic contact dermatitis
495	DOID:11450	allergic cutaneous vasculitis
496	DOID:4481	allergic rhinitis
497	DOID:8205	alloimmunization
498	DOID:986	alopecia areata
499	DOID:0050634	alopecia universalis
500	DOID:987	alopecia
501	DOID:13372	alpha 1-antitrypsin deficiency
502	DOID:1099	alpha thalassemia
503	DOID:3413	alpha-mannosidosis
504	DOID:0050635	alternating hemiplegia of childhood
505	DOID:12148	alveolar echinococcosis
506	DOID:4051	alveolar rhabdomyosarcoma
507	DOID:4239	alveolar soft part sarcoma
508	DOID:10376	amblyopia
509	DOID:9181	amebiasis
510	DOID:4359	amelanotic melanoma
511	DOID:2187	amelogenesis imperfecta
512	DOID:13938	amenorrhea
513	DOID:9252	amino acid metabolic disorder
514	DOID:10914	amnestic disorder
515	DOID:670	amphetamine abuse
516	DOID:4932	ampulla of Vater carcinoma
517	DOID:9120	amyloidosis
518	DOID:332	amyotrophic lateral sclerosis
519	DOID:10383	amyotrophic neuralgia
520	DOID:4908	anal carcinoma
521	DOID:3078	anaplastic astrocytoma
522	DOID:5651	anaplastic carcinoma
523	DOID:5889	anaplastic ependymoma
524	DOID:5613	anaplastic meningioma
525	DOID:7306	anaplastic oligoastrocytoma
526	DOID:7154	anaplastic oligodendroglioma
527	DOID:7012	anaplastic thyroid carcinoma
528	DOID:0050640	anauxetic dysplasia
529	DOID:4674	androgen insensitivity syndrome
530	DOID:2355	anemia
531	DOID:2403	aneurysm disease
532	DOID:1558	angioedema
533	DOID:13401	angioid streaks
534	DOID:479	angiokeratoma
535	DOID:6548	angiomatous meningioma
536	DOID:3314	angiomyolipoma
537	DOID:4265	angiomyoma
538	DOID:0001816	angiosarcoma
539	DOID:13550	angle-closure glaucoma
540	DOID:11156	anhidrosis
541	DOID:12271	aniridia
542	DOID:12273	anisometropia
543	DOID:7147	ankylosing spondylitis
544	DOID:227	ankylosis
545	DOID:13714	anodontia
546	DOID:11168	anogenital venereal wart
547	DOID:0050643	anonychia congenita
548	DOID:8689	anorexia nervosa
549	DOID:3781	anovulation
550	DOID:4873	anterior horn cell disease
551	DOID:1407	anterior uveitis
552	DOID:5845	anterolateral myocardial infarction
553	DOID:5855	anteroseptal myocardial infarction
554	DOID:10327	anthracosis
555	DOID:7427	anthrax disease
556	DOID:2988	antiphospholipid syndrome
557	DOID:10939	antisocial personality disorder
558	DOID:3755	antithrombin III deficiency
559	DOID:2983	anuria
560	DOID:14110	anus cancer
561	DOID:3128	anus disease
562	DOID:4551	anus neoplasm
563	DOID:2030	anxiety disorder
564	DOID:3627	aortic aneurysm
565	DOID:10230	aortic atherosclerosis
566	DOID:520	aortic disease
567	DOID:54	aortic incompetence
568	DOID:62	aortic valve disease
569	DOID:57	aortic valve insufficiency
570	DOID:1712	aortic valve stenosis
571	DOID:519	aortitis
572	DOID:0060046	aphasia
573	DOID:9663	aphthous stomatitis
574	DOID:12449	aplastic anemia
575	DOID:8337	appendicitis
576	DOID:0060135	apraxia
577	DOID:0050455	arachnodactyly
578	DOID:4445	arachnoid cyst
579	DOID:11342	arcus senilis
580	DOID:14755	argininosuccinic aciduria
581	DOID:8454	ariboflavinosis
582	DOID:0050431	arrhythmogenic right ventricular dysplasia
583	DOID:2868	arterial occlusive disease
584	DOID:0050645	arterial tortuosity syndrome
585	DOID:5162	arteriolosclerosis
586	DOID:5160	arteriosclerosis obliterans
587	DOID:2349	arteriosclerosis
588	DOID:11294	arteriovenous malformation
589	DOID:848	arthritis
590	DOID:381	arthropathy
591	DOID:4186	articulation disorder
592	DOID:10320	asbestosis
593	DOID:456	ascariasis
594	DOID:13577	ascorbic acid deficiency
595	DOID:12157	aseptic meningitis
596	DOID:0050461	aspartylglucosaminuria
597	DOID:13564	aspergillosis
598	DOID:11088	asphyxia neonatorum
599	DOID:0050592	asphyxiating thoracic dystrophy
600	DOID:0050152	aspiration pneumonia
601	DOID:3240	aspiration pneumonitis
602	DOID:2841	asthma
603	DOID:11782	astigmatism
604	DOID:3069	astrocytoma
605	DOID:12704	ataxia telangiectasia
606	DOID:0050670	ataxic cerebral palsy
607	DOID:0050648	atelosteogenesis
608	DOID:1936	atherosclerosis
609	DOID:2546	atonic epilepsy
610	DOID:3310	atopic dermatitis
611	DOID:0050649	atransferrinemia
612	DOID:1882	atrial heart septal defect
613	DOID:0050651	atrioventricular septal defect
614	DOID:8929	atrophic gastritis
615	DOID:913	atrophic muscular disease
616	DOID:2301	atrophy of prostate
617	DOID:2853	atrophy of thyroid
618	DOID:1094	attention deficit hyperactivity disorder
619	DOID:412	atypical Mycobacterium infectious disease
620	DOID:2129	atypical teratoid rhabdoid tumor
621	DOID:2742	auditory system disease
622	DOID:0060041	autism spectrum disorder
623	DOID:12849	autistic disorder
624	DOID:718	autoimmune hemolytic anemia
625	DOID:2048	autoimmune hepatitis
626	DOID:6688	autoimmune lymphoproliferative syndrome
627	DOID:0050167	autoimmune polyendocrine syndrome type 1
628	DOID:0050168	autoimmune polyendocrine syndrome type 2
629	DOID:14040	autoimmune polyendocrine syndrome
630	DOID:8924	autoimmune thrombocytopenic purpura
631	DOID:7188	autoimmune thyroiditis
632	DOID:11465	autonomic nervous system disease
633	DOID:11504	autonomic neuropathy
634	DOID:0050564	autosomal dominant nonsyndromic deafness
635	DOID:5937	autosomal dominant polycystic kidney
636	DOID:14756	autosomal dominant type IV Ehlers-Danlos syndrome
637	DOID:0050565	autosomal recessive nonsyndromic deafness
638	DOID:5928	autosomal recessive polycystic kidney
639	DOID:4492	avian influenza
640	DOID:3800	avian leukosis
641	DOID:1509	avoidant personality disorder
642	DOID:7319	axonal neuropathy
643	DOID:14227	azoospermia
644	DOID:762	bacterial endocarditis
645	DOID:104	bacterial infectious disease
646	DOID:9470	bacterial meningitis
647	DOID:874	bacterial pneumonia
648	DOID:3385	bacterial vaginosis
649	DOID:1412	bacteriuria
650	DOID:2513	basal cell carcinoma
651	DOID:679	basal ganglia disease
652	DOID:1631	benign breast phyllodes tumor
653	DOID:4844	benign ependymoma
654	DOID:0060169	benign familial infantile epilepsy
655	DOID:14777	benign familial neonatal epilepsy
656	DOID:4587	benign meningioma
657	DOID:2645	benign mesothelioma
658	DOID:1455	benign migratory glossitis
659	DOID:3404	benign monoclonal gammopathy
660	DOID:14264	benign neonatal seizures
661	DOID:0060072	benign neoplasm
662	DOID:10322	berylliosis
663	DOID:0050662	bestrophinopathy
664	DOID:12241	beta thalassemia
665	DOID:14723	beta-ketothiolase deficiency
666	DOID:3633	beta-mannosidosis
667	DOID:6741	bilateral breast cancer
668	DOID:4606	bile duct cancer
669	DOID:4897	bile duct carcinoma
670	DOID:4138	bile duct disease
671	DOID:12237	bile reflux
672	DOID:13608	biliary atresia
673	DOID:4607	biliary tract cancer
674	DOID:9741	biliary tract disease
675	DOID:0050625	biliary tract neoplasm
676	DOID:2741	bilirubin metabolic disorder
677	DOID:0050659	biotin-responsive basal ganglia disease
678	DOID:856	biotinidase deficiency
679	DOID:5492	biphasic synovial sarcoma
680	DOID:3312	bipolar disorder
681	DOID:13891	bird fancier's lung
682	DOID:3711	bladder adenocarcinoma
683	DOID:4007	bladder carcinoma
684	DOID:365	bladder disease
685	DOID:13948	bladder neck obstruction
686	DOID:3742	bladder squamous cell carcinoma
687	DOID:4006	bladder transitional cell carcinoma
688	DOID:6933	bladder transitional cell papilloma
689	DOID:14778	blepharophimosis, ptosis, and epicanthus inversus syndrome
690	DOID:10348	blepharophimosis
691	DOID:529	blepharospasm
692	DOID:1432	blindness
693	DOID:1247	blood coagulation disease
694	DOID:4176	blood group incompatibility
695	DOID:2218	blood platelet disease
696	DOID:620	blood protein disease
697	DOID:2717	bloom syndrome
698	DOID:11661	blue color blindness
699	DOID:0050679	blue cone monochromacy
700	DOID:2086	blue nevus
701	DOID:184	bone cancer
702	DOID:0080001	bone disease
703	DOID:4960	bone marrow cancer
704	DOID:4961	bone marrow disease
705	DOID:3376	bone osteosarcoma
706	DOID:10930	borderline personality disorder
707	DOID:14095	boutonneuse fever
708	DOID:411	bovine tuberculosis
709	DOID:3689	brachial plexus neuritis
710	DOID:3690	brachial plexus neuropathy
711	DOID:0050689	brachydactyly-syndactyly syndrome
712	DOID:0050581	brachydactyly
713	DOID:0050690	brachyolmia
714	DOID:0050335	bradyopsia
715	DOID:1319	brain cancer
716	DOID:936	brain disease
717	DOID:4724	brain edema
718	DOID:4369	brain hypoxia-Ischemia
719	DOID:3454	brain infarction
720	DOID:2316	brain ischemia
721	DOID:4203	brain stem neoplasm
722	DOID:0050691	branchiooculofacial syndrome
723	DOID:14702	branchiootorenal syndrome
724	DOID:3458	breast adenocarcinoma
725	DOID:1612	breast cancer
726	DOID:8791	breast carcinoma in situ
727	DOID:3459	breast carcinoma
728	DOID:10350	breast cyst
729	DOID:3463	breast disease
730	DOID:1618	breast fibroadenoma
731	DOID:10354	breast fibrocystic disease
732	DOID:3016	breast malignant phyllodes tumor
733	DOID:1176	bronchial disease
734	DOID:3906	bronchial neoplasm
735	DOID:9563	bronchiectasis
736	DOID:2799	bronchiolitis obliterans
737	DOID:2942	bronchiolitis
738	DOID:4926	bronchiolo-alveolar adenocarcinoma
739	DOID:6132	bronchitis
740	DOID:3904	bronchogenic carcinoma
741	DOID:12375	bronchopneumonia
742	DOID:11650	bronchopulmonary dysplasia
743	DOID:11077	brucellosis
744	DOID:12129	bulimia nervosa
745	DOID:11031	bullous keratopathy
746	DOID:8506	bullous pemphigoid
747	DOID:8502	bullous skin disease
748	DOID:11211	buphthalmos
749	DOID:4331	burning mouth syndrome
750	DOID:10323	byssinosis
751	DOID:13945	cadasil
752	DOID:182	calcinosis
753	DOID:10575	calcium metabolism disease
754	DOID:0050463	campomelic dysplasia
755	DOID:13622	campylobacteriosis
756	DOID:462	cancer by anatomical entity
757	DOID:162	cancer
758	DOID:1508	candidiasis
759	DOID:9505	cannabis abuse
760	DOID:1849	cannabis dependence
761	DOID:1271	capillary disease
762	DOID:2725	capillary hemangioma
763	DOID:9280	carbamoyl phosphate synthetase I deficiency disease
764	DOID:2978	carbohydrate metabolic disorder
765	DOID:4615	carcinoma of unknown primary
766	DOID:305	carcinoma
767	DOID:4236	carcinosarcoma
768	DOID:115	cardiac tamponade
769	DOID:0050700	cardiomyopathy
770	DOID:1287	cardiovascular system disease
771	DOID:3407	carotid artery disease
772	DOID:3410	carotid artery thrombosis
773	DOID:13001	carotid stenosis
774	DOID:12169	carpal tunnel syndrome
775	DOID:1222	cartilage disease
776	DOID:14773	cartilage-hair hypoplasia
777	DOID:83	cataract
778	DOID:10925	catatonic schizophrenia
779	DOID:483	cavernous hemangioma
780	DOID:1517	cecal neoplasm
781	DOID:1521	cecum cancer
782	DOID:1519	cecum carcinoma
783	DOID:10608	celiac disease
784	DOID:5227	cellular blue nevus
785	DOID:5500	cellular ependymoma
786	DOID:3488	cellulitis
787	DOID:3529	central core myopathy
788	DOID:3620	central nervous system cancer
789	DOID:331	central nervous system disease
790	DOID:3234	central nervous system lymphoma
791	DOID:2479	central nervous system origin vertigo
792	DOID:14174	central neurocytoma
793	DOID:9220	central sleep apnea
794	DOID:14717	centronuclear myopathy
795	DOID:2786	cerebellar disease
796	DOID:0060104	cerebellar medulloblastoma
797	DOID:3200	cerebellopontine angle tumor
798	DOID:4205	cerebellum cancer
799	DOID:9246	cerebral amyloid angiopathy
800	DOID:3527	cerebral arterial disease
801	DOID:12720	cerebral atherosclerosis
802	DOID:6114	cerebral convexity meningioma
803	DOID:3526	cerebral infarction
804	DOID:14069	cerebral malaria
805	DOID:1969	cerebral palsy
806	DOID:7398	cerebral primitive neuroectodermal tumor
807	DOID:10551	cerebral toxoplasmosis
808	DOID:4810	cerebrotendinous xanthomatosis
809	DOID:3455	cerebrovascular accident
810	DOID:6713	cerebrovascular disease
811	DOID:3702	cervical adenocarcinoma
812	DOID:4362	cervical cancer
813	DOID:9681	cervical incompetence
814	DOID:3744	cervical squamous cell carcinoma
815	DOID:2893	cervix carcinoma
816	DOID:2253	cervix disease
817	DOID:8991	cervix uteri carcinoma in situ
818	DOID:1762	cheilitis
819	DOID:1856	cherubism
820	DOID:8659	chickenpox
821	DOID:4499	child nutrition disorder
822	DOID:1825	childhood absence epilepsy
823	DOID:6383	childhood brain stem glioma
824	DOID:4705	childhood brain tumor
825	DOID:7007	childhood cerebral astrocytoma
826	DOID:3869	childhood medulloblastoma
827	DOID:3183	childhood oligodendroglioma
828	DOID:12921	childhood schizophrenia
829	DOID:3521	childhood soft tissue sarcoma
830	DOID:14203	childhood type dermatomyositis
831	DOID:9574	choanal atresia
832	DOID:4947	cholangiocarcinoma
833	DOID:9446	cholangitis
834	DOID:1949	cholecystitis
835	DOID:11151	cholecystolithiasis
836	DOID:899	choledochal cyst
837	DOID:11755	choledocholithiasis
838	DOID:10211	cholelithiasis
839	DOID:1498	cholera
840	DOID:13580	cholestasis
841	DOID:869	cholesteatoma
842	DOID:1461	cholesterol embolism
843	DOID:14502	cholesterol ester storage disease
844	DOID:8456	choline deficiency disease
845	DOID:2557	chondromalacia
846	DOID:2602	chondroma
847	DOID:3371	chondrosarcoma
848	DOID:3302	chordoma
849	DOID:0050697	chorioamnionitis
850	DOID:277	chorioangioma
851	DOID:3594	choriocarcinoma
852	DOID:8886	chorioretinitis
853	DOID:1417	choroid disease
854	DOID:3540	choroid plexus cancer
855	DOID:5648	choroid plexus carcinoma
856	DOID:2626	choroid plexus papilloma
857	DOID:980	choroidal sclerosis
858	DOID:9821	choroideremia
859	DOID:11406	choroiditis
860	DOID:4471	chromophobe adenocarcinoma
861	DOID:3828	chromophobe adenoma
862	DOID:250	chronic brain damage
863	DOID:844	chronic depressive disorder
864	DOID:8544	chronic fatigue syndrome
865	DOID:3265	chronic granulomatous disease
866	DOID:5213	chronic inflammatory demyelinating polyradiculoneuropathy
867	DOID:1678	chronic interstitial cystitis
868	DOID:784	chronic kidney failure
869	DOID:1036	chronic leukemia
870	DOID:1040	chronic lymphocytic leukemia
871	DOID:8593	chronic monocytic leukemia
872	DOID:2058	chronic mucocutaneous candidiasis
873	DOID:8552	chronic myeloid leukemia
874	DOID:3083	chronic obstructive pulmonary disease
875	DOID:12558	chronic progressive external ophthalmoplegia
876	DOID:2376	chronic progressive multiple sclerosis
877	DOID:2985	chronic rejection of renal transplant
878	DOID:1231	chronic schizophrenia
879	DOID:10600	chronic tic disorder
880	DOID:8549	chronic ulcer of skin
881	DOID:13364	chronobiology disease
882	DOID:11656	cicatricial pemphigoid
883	DOID:9273	citrullinemia
884	DOID:4468	clear cell adenocarcinoma
885	DOID:5867	clear cell chondrosarcoma
886	DOID:5507	clear cell ependymoma
887	DOID:4210	clear cell meningioma
888	DOID:4233	clear cell sarcoma
889	DOID:9296	cleft lip
890	DOID:674	cleft palate
891	DOID:13994	cleidocranial dysplasia
892	DOID:13767	clonorchiasis
893	DOID:11836	clubfoot
894	DOID:2212	coagulation protein disease
895	DOID:809	cocaine abuse
896	DOID:9975	cocaine dependence
897	DOID:5463	cochlear disease
898	DOID:1561	cognitive disorder
899	DOID:4464	collecting duct carcinoma
900	DOID:11975	coloboma of optic nerve
901	DOID:12270	coloboma
902	DOID:234	colon adenocarcinoma
903	DOID:219	colon cancer
904	DOID:1520	colon carcinoma
905	DOID:5353	colonic disease
906	DOID:235	colonic neoplasm
907	DOID:13399	color blindness
908	DOID:11662	color vision defect
909	DOID:9256	colorectal cancer
910	DOID:6950	combat disorder
911	DOID:628	combined T cell and B cell immunodeficiency
912	DOID:0050360	commensal Enterobacteriaceae infectious disease
913	DOID:2905	commensal Escherichia coli infectious disease
914	DOID:0050385	commensal Helicobacter infectious disease
915	DOID:0050407	commensal Mycoplasma infectious disease
916	DOID:0050370	commensal Neisseriaceae infectious disease
917	DOID:0050371	commensal Pasteurellaceae infectious disease
918	DOID:2898	commensal streptococcal infectious disease
919	DOID:4608	common bile duct neoplasm
920	DOID:10459	common cold
921	DOID:12177	common variable immunodeficiency
922	DOID:11165	common wart
923	DOID:1573	communicating hydrocephalus
924	DOID:682	compartment syndrome
925	DOID:8158	complement component 5 deficiency
926	DOID:626	complement deficiency
927	DOID:0050419	complement factor I deficiency
928	DOID:12382	complex partial epilepsy
929	DOID:3223	complex regional pain syndrome
930	DOID:12995	conduct disorder
931	DOID:0050572	cone-rod dystrophy
932	DOID:12255	congenital adrenal hyperplasia
933	DOID:0050546	congenital adrenal insufficiency
934	DOID:2236	congenital afibrinogenemia
935	DOID:1711	congenital aortic valve stenosis
936	DOID:11367	congenital aphakia
937	DOID:0050674	congenital bile acid synthesis defect
938	DOID:1086	congenital chromosomal disease
939	DOID:3827	congenital diaphragmatic hernia
940	DOID:0050571	congenital disorder of glycosylation type II
941	DOID:0050570	congenital disorder of glycosylation type I
942	DOID:5212	congenital disorder of glycosylation
943	DOID:759	congenital disorder
944	DOID:1338	congenital dyserythropoietic anemia
945	DOID:7280	congenital epulis
946	DOID:0050585	congenital generalized lipodystrophy
947	DOID:990	congenital heart block
948	DOID:1682	congenital heart defect
949	DOID:589	congenital hemolytic anemia
950	DOID:9353	congenital hip dislocation
951	DOID:1342	congenital hypoplastic anemia
952	DOID:0050328	congenital hypothyroidism
953	DOID:1699	congenital ichthyosiform erythroderma
954	DOID:1695	congenital ichthyosis
955	DOID:0050557	congenital muscular dystrophy
956	DOID:652	congenital musculoskeletal abnormality
957	DOID:3635	congenital myasthenic syndrome
958	DOID:2490	congenital nervous system abnormality
959	DOID:2861	congenital nonspherocytic hemolytic anemia
960	DOID:9649	congenital nystagmus
961	DOID:0050534	congenital stationary night blindness
962	DOID:422	congenital structural myopathy
963	DOID:13336	congenital toxoplasmosis
964	DOID:6000	congestive heart failure
965	DOID:5467	conjunctival cancer
966	DOID:4251	conjunctival disease
967	DOID:10526	conjunctival pterygium
968	DOID:6195	conjunctivitis
969	DOID:0060123	connective tissue benign neoplasm
970	DOID:65	connective tissue disease
971	DOID:2089	constipation
972	DOID:2773	contact dermatitis
973	DOID:8771	contagious pustular dermatitis
974	DOID:895	copper metabolism disease
975	DOID:8515	cor pulmonale
976	DOID:10124	corneal disease
977	DOID:2566	corneal dystrophy
978	DOID:12318	corneal granular dystrophy
979	DOID:11382	corneal neovascularization
980	DOID:8463	corneal ulcer
981	DOID:3362	coronary aneurysm
982	DOID:3363	coronary arteriosclerosis
983	DOID:11840	coronary artery vasospasm
984	DOID:3393	coronary heart disease
985	DOID:4247	coronary restenosis
986	DOID:4248	coronary stenosis
987	DOID:11847	coronary thrombosis
988	DOID:2946	coronavirus infectious disease
989	DOID:13050	corpus luteum cyst
990	DOID:0060140	cortical deafness
991	DOID:10545	coxsackievirus infectious disease
992	DOID:10334	craniofacial abnormality
993	DOID:14737	craniofrontonasal syndrome
994	DOID:3840	craniopharyngioma
995	DOID:2340	craniosynostosis
996	DOID:13139	crescentic glomerulonephritis
997	DOID:5675	cribriform carcinoma
998	DOID:14402	critical illness polyneuropathy
999	DOID:2917	cryoglobulinemia
1000	DOID:12053	cryptococcosis
1001	DOID:11383	cryptorchidism
1002	DOID:1733	cryptosporidiosis
1003	DOID:0060061	cutaneous T cell lymphoma
1004	DOID:4418	cutaneous fibrous histiocytoma
1005	DOID:9111	cutaneous leishmaniasis
1006	DOID:0050169	cutaneous lupus erythematosus
1007	DOID:3663	cutaneous mastocytosis
1008	DOID:13271	cutaneous porphyria
1009	DOID:3144	cutis laxa
1010	DOID:5339	cyclic hematopoiesis
1011	DOID:845	cyclothymic disorder
1012	DOID:3111	cystadenocarcinoma
1013	DOID:2634	cystadenoma
1014	DOID:1485	cystic fibrosis
1015	DOID:2975	cystic kidney
1016	DOID:164	cystic, mucinous, and serous neoplasm
1017	DOID:10079	cysticercosis
1018	DOID:1064	cystinosis
1019	DOID:9266	cystinuria
1020	DOID:1679	cystitis
1021	DOID:4447	cystoid macular edema
1022	DOID:3762	cytochrome-c oxidase deficiency
1023	DOID:8717	decubitus ulcer
1024	DOID:11829	degenerative myopia
1025	DOID:5575	delayed puberty
1026	DOID:778	delusional disorder
1027	DOID:1307	dementia
1028	DOID:3213	demyelinating disease
1029	DOID:5214	demyelinating polyneuropathy
1030	DOID:12205	dengue disease
1031	DOID:12206	dengue hemorrhagic fever
1032	DOID:0050125	dengue shock syndrome
1033	DOID:216	dental caries
1034	DOID:693	dental enamel hypoplasia
1035	DOID:13711	dental fluorosis
1036	DOID:0060162	dentatorubral-pallidoluysian atrophy
1037	DOID:701	dentin dysplasia
1038	DOID:4154	dentinogenesis imperfecta
1039	DOID:8505	dermatitis herpetiformis
1040	DOID:2723	dermatitis
1041	DOID:1563	dermatomycosis
1042	DOID:10223	dermatomyositis
1043	DOID:8913	dermatophytosis
1044	DOID:2658	dermoid cyst
1045	DOID:3866	desmoplastic medulloblastoma
1046	DOID:6785	desmoplastic small round cell tumor
1047	DOID:2796	desquamative interstitial pneumonia
1048	DOID:9923	developmental coordination disorder
1049	DOID:9565	dextrocardia
1050	DOID:9409	diabetes insipidus
1051	DOID:9351	diabetes mellitus
1052	DOID:11713	diabetic angiopathy
1053	DOID:11503	diabetic autonomic neuropathy
1054	DOID:1837	diabetic ketoacidosis
1055	DOID:2370	diabetic nephropathy
1056	DOID:9743	diabetic neuropathy
1057	DOID:12785	diabetic polyneuropathy
1058	DOID:8947	diabetic retinopathy
1059	DOID:13250	diarrhea
1060	DOID:9775	diastolic heart failure
1061	DOID:14687	diastrophic dysplasia
1062	DOID:4857	diffuse astrocytoma
1063	DOID:3665	diffuse cutaneous mastocytosis
1064	DOID:6652	diffuse idiopathic skeletal hyperostosis
1065	DOID:1580	diffuse scleroderma
1066	DOID:14218	dihydropyrimidine dehydrogenase deficiency
1067	DOID:12930	dilated cardiomyopathy
1068	DOID:14200	diplopia
1069	DOID:5804	discrete subaortic stenosis
1070	DOID:0050117	disease by infectious agent
1071	DOID:150	disease of mental health
1072	DOID:0014667	disease of metabolism
1073	DOID:4	disease
1074	DOID:792	disorganized schizophrenia
1075	DOID:9499	disseminated eosinophilic collagen disease
1076	DOID:11247	disseminated intravascular coagulation
1077	DOID:4173	disseminated neuroblastoma
1078	DOID:13174	dissociated nystagmus
1079	DOID:11037	dissociative amnesia
1080	DOID:10935	dissociative disorder
1081	DOID:0050646	distal arthrogryposis
1082	DOID:0050582	distal hereditary motor neuropathy
1083	DOID:11720	distal muscular dystrophy
1084	DOID:7475	diverticulitis
1085	DOID:6406	double outlet right ventricle
1086	DOID:9829	drug abstinence syndrome or symptom
1087	DOID:9974	drug dependence
1088	DOID:1742	drug psychosis
1089	DOID:4478	drug-Induced dyskinesia
1090	DOID:4263	drug-induced akathisia
1091	DOID:2044	drug-induced hepatitis
1092	DOID:10140	dry eye syndrome
1093	DOID:0060074	ductal carcinoma in situ
1094	DOID:3007	ductal carcinoma
1095	DOID:2620	ductal, lobular, and medullary neoplasm
1096	DOID:4072	duodenal disease
1097	DOID:1737	duodenal neoplasm
1098	DOID:1724	duodenal ulcer
1099	DOID:10021	duodenum cancer
1100	DOID:7938	dyschondroplasia
1101	DOID:11702	dysgammaglobulinemia
1102	DOID:4441	dysgerminoma
1103	DOID:2729	dyskeratosis congenita
1104	DOID:0050672	dyskinetic cerebral palsy
1105	DOID:306	dyskinetic syndrome
1106	DOID:4428	dyslexia
1107	DOID:1934	dysostosis
1108	DOID:2321	dyspepsia
1109	DOID:8586	dysplasia of cervix
1110	DOID:12139	dysthymic disorder
1111	DOID:11910	dystonia musculorum deformans
1112	DOID:543	dystonia
1113	DOID:544	dystonic disease
1114	DOID:308	early myoclonic encephalopathy
1115	DOID:8670	eating disorder
1116	DOID:1496	echinococcosis
1117	DOID:10911	echovirus infectious disease
1118	DOID:13593	eclampsia
1119	DOID:2121	ectodermal dysplasia
1120	DOID:1570	ectropion
1121	DOID:9123	eczema herpeticum
1122	DOID:4377	egg allergy
1123	DOID:5050	ehrlich tumor carcinoma
1124	DOID:4766	embryoma
1125	DOID:688	embryonal cancer
1126	DOID:3308	embryonal carcinoma
1127	DOID:3256	embryonal childhood rhabdomyosarcoma
1128	DOID:3246	embryonal rhabdomyosarcoma
1129	DOID:3642	empty sella syndrome
1130	DOID:9588	encephalitis
1131	DOID:640	encephalomyelitis
1132	DOID:4625	enchondromatosis
1133	DOID:783	end stage renal failure
1134	DOID:13198	endemic goiter
1135	DOID:170	endocrine gland cancer
1136	DOID:28	endocrine system disease
1137	DOID:1911	endodermal sinus tumor
1138	DOID:1595	endogenous depression
1139	DOID:9848	endolymphatic hydrops
1140	DOID:2870	endometrial adenocarcinoma
1141	DOID:1380	endometrial cancer
1142	DOID:2871	endometrial carcinoma
1143	DOID:1005	endometrial disease
1144	DOID:4226	endometrial stromal sarcoma
1145	DOID:5166	endometrial stromal tumor
1146	DOID:288	endometriosis of uterus
1147	DOID:289	endometriosis
1148	DOID:1002	endometritis
1149	DOID:12932	endomyocardial fibrosis
1150	DOID:0050332	enlarged vestibular aqueduct
1151	DOID:13601	enteropathogenic Escherichia coli infectious disease
1152	DOID:204	enthesopathy
1153	DOID:2958	environmental illness
1154	DOID:998	eosinophilia-myalgia syndrome
1155	DOID:999	eosinophilia
1156	DOID:13922	eosinophilic esophagitis
1157	DOID:4794	ependymoblastoma
1158	DOID:14087	epicondylitis
1159	DOID:0050532	epidermal nevus
1160	DOID:13777	epidermodysplasia verruciformis
1161	DOID:4313	epidermolysis bullosa acquisita
1162	DOID:4959	epidermolysis bullosa dystrophica
1163	DOID:4644	epidermolysis bullosa simplex
1164	DOID:2730	epidermolysis bullosa
1165	DOID:4603	epidermolytic hyperkeratosis
1166	DOID:11349	epilepsia partialis continua
1167	DOID:1826	epilepsy syndrome
1168	DOID:7725	epilepsy with generalized tonic-clonic seizures
1169	DOID:963	episodic ataxia
1170	DOID:157	epithelial carcinoma
1171	DOID:2413	epithelioid and spindle cell nevus
1172	DOID:5264	epithelioid leiomyosarcoma
1173	DOID:6193	epithelioid sarcoma
1174	DOID:5337	epulis
1175	DOID:5002	equine infectious anemia
1176	DOID:0050185	erythema multiforme
1177	DOID:0050467	erythrokeratodermia variabilis
1178	DOID:9240	erythromelalgia
1179	DOID:13270	erythropoietic protoporphyria
1180	DOID:10485	esophageal atresia
1181	DOID:5041	esophageal cancer
1182	DOID:1107	esophageal carcinoma
1183	DOID:6050	esophageal disease
1184	DOID:112	esophageal varix
1185	DOID:11963	esophagitis
1186	DOID:4914	esophagus adenocarcinoma
1187	DOID:3748	esophagus squamous cell carcinoma
1188	DOID:9840	esotropia
1189	DOID:10825	essential hypertension
1190	DOID:4990	essential tremor
1191	DOID:13078	eumycotic mycetoma
1192	DOID:5003	eunuchism
1193	DOID:0050486	exanthem
1194	DOID:13757	excessive tearing
1195	DOID:13641	exfoliation syndrome
1196	DOID:10236	exhibitionism
1197	DOID:13316	exocrine pancreatic insufficiency
1198	DOID:9370	exophthalmos
1199	DOID:1143	exotropia
1200	DOID:4357	experimental melanoma
1201	DOID:4682	extrahepatic bile duct carcinoma
1202	DOID:2099	extramammary Paget's disease
1203	DOID:4985	extraosseous Ewings sarcoma-primitive neuroepithelial tumor
1204	DOID:6496	extraskeletal myxoid chondrosarcoma
1205	DOID:841	extrinsic allergic alveolitis
1206	DOID:0050535	exudative vitreoretinopathy
1207	DOID:1492	eye and adnexa disease
1208	DOID:5614	eye disease
1209	DOID:1752	eye melanoma
1210	DOID:530	eyelid disease
1211	DOID:3134	facial dermatosis
1212	DOID:448	facial neoplasm
1213	DOID:13934	facial paralysis
1214	DOID:11727	facioscapulohumeral muscular dystrophy
1215	DOID:2216	factor V deficiency
1216	DOID:2215	factor VII deficiency
1217	DOID:12134	factor VIII deficiency
1218	DOID:2222	factor X deficiency
1219	DOID:2229	factor XI deficiency
1220	DOID:2231	factor XII deficiency
1221	DOID:2211	factor XIII deficiency
1222	DOID:1964	fallopian tube cancer
1223	DOID:1963	fallopian tube carcinoma
1224	DOID:1962	fallopian tube disease
1225	DOID:2987	familial Mediterranean fever
1226	DOID:0050306	familial abdominal aortic aneurysm
1227	DOID:0050424	familial adenomatous polyposis
1228	DOID:0050650	familial atrial fibrillation
1229	DOID:10041	familial atypical multiple mole-melanoma
1230	DOID:13809	familial combined hyperlipidemia
1231	DOID:5159	familial dystonia
1232	DOID:0060178	familial hemiplegic migraine
1233	DOID:13810	familial hypercholesterolemia
1234	DOID:1168	familial hyperlipidemia
1235	DOID:0050527	familial hypertriglyceridemia
1236	DOID:11986	familial hypertrophic cardiomyopathy
1237	DOID:0060062	familial juvenile hyperuricemic nephropathy
1238	DOID:14118	familial lipoprotein lipase deficiency
1239	DOID:0050547	familial medullary thyroid carcinoma
1240	DOID:4586	familial meningioma
1241	DOID:0050440	familial partial lipodystrophy
1242	DOID:1029	familial periodic paralysis
1243	DOID:4648	familial retinoblastoma
1244	DOID:0050636	familial visceral amyloidosis
1245	DOID:14453	farmer's lung
1246	DOID:0050433	fatal familial insomnia
1247	DOID:0050713	fatal infantile encephalocardiomyopathy
1248	DOID:9452	fatty liver disease
1249	DOID:13628	favism
1250	DOID:5087	feline infectious peritonitis
1251	DOID:7843	female breast carcinoma
1252	DOID:3001	female reproductive endometrioid cancer
1253	DOID:120	female reproductive organ cancer
1254	DOID:229	female reproductive system disease
1255	DOID:0050665	fetal alcohol syndrome
1256	DOID:1987	fetal disease
1257	DOID:4027	fetal distress
1258	DOID:1098	fetal erythroblastosis
1259	DOID:13583	fetal nutrition disorder
1260	DOID:6726	fibrillary astrocytoma
1261	DOID:13374	fibrodysplasia ossificans progressiva
1262	DOID:2389	fibromuscular dysplasia
1263	DOID:631	fibromyalgia
1264	DOID:3355	fibrosarcoma
1265	DOID:4415	fibrous histiocytoma
1266	DOID:7211	fibrous meningioma
1267	DOID:12211	filarial elephantiasis
1268	DOID:1080	filariasis
1269	DOID:14263	fits in newborn
1270	DOID:2120	focal dermal hypoplasia
1271	DOID:2234	focal epilepsy
1272	DOID:5362	focal epithelial hyperplasia
1273	DOID:3945	focal glomerulosclerosis
1274	DOID:1312	focal segmental glomerulosclerosis
1275	DOID:8453	folic acid deficiency
1276	DOID:6204	follicular adenoma
1277	DOID:6262	follicular dendritic cell sarcoma
1278	DOID:3962	follicular thyroid carcinoma
1279	DOID:3044	food allergy
1280	DOID:10869	fourth cranial nerve palsy
1281	DOID:14261	fragile X syndrome
1282	DOID:3331	frontal lobe epilepsy
1283	DOID:9255	frontotemporal dementia
1284	DOID:5204	fructose-1,6-bisphosphatase deficiency
1285	DOID:14500	fucosidosis
1286	DOID:3877	functional colonic disease
1287	DOID:5715	functionless pituitary adenoma
1288	DOID:11105	fundus albipunctatus
1289	DOID:8501	fundus dystrophy
1290	DOID:1564	fungal infectious disease
1291	DOID:11341	fungal lung infectious disease
1292	DOID:0050698	funisitis
1293	DOID:14695	galactokinase deficiency
1294	DOID:10689	galactorrhea not associated with childbirth
1295	DOID:9870	galactosemia
1296	DOID:3500	gallbladder adenocarcinoma
1297	DOID:3121	gallbladder cancer
1298	DOID:4948	gallbladder carcinoma
1299	DOID:0000000	gallbladder disease
1300	DOID:0060013	gamma chain deficiency
1301	DOID:2426	gangliocytoma
1302	DOID:5078	ganglioglioma
1303	DOID:4163	ganglioneuroblastoma
1304	DOID:3322	gangliosidosis GM1
1305	DOID:2368	gangliosidosis
1306	DOID:3717	gastric adenocarcinoma
1307	DOID:2493	gastric antral vascular ectasia
1308	DOID:6270	gastric cardia carcinoma
1309	DOID:6217	gastric diffuse adenocarcinoma
1310	DOID:10540	gastric lymphoma
1311	DOID:8757	gastric mucosal hypertrophy
1312	DOID:10808	gastric ulcer
1313	DOID:5577	gastrinoma
1314	DOID:4029	gastritis
1315	DOID:2326	gastroenteritis
1316	DOID:8534	gastroesophageal reflux disease
1317	DOID:903	gastrointestinal lymphoma
1318	DOID:9253	gastrointestinal stromal tumor
1319	DOID:3119	gastrointestinal system cancer
1320	DOID:77	gastrointestinal system disease
1321	DOID:11914	gastroparesis
1322	DOID:11044	gastroschisis
1323	DOID:7005	gemistocytic astrocytoma
1324	DOID:14320	generalized anxiety disorder
1325	DOID:0050644	generalized arterial calcification of infancy
1326	DOID:2347	generalized atherosclerosis
1327	DOID:7724	generalized convulsive epilepsy
1328	DOID:0060170	generalized epilepsy with febrile seizures plus
1329	DOID:10505	generalized nonconvulsive epilepsy disease
1330	DOID:630	genetic disease
1331	DOID:8704	genital herpes
1332	DOID:1265	genitourinary cancer
1333	DOID:3095	germ cell and embryonal cancer
1334	DOID:2994	germ cell cancer
1335	DOID:3304	germinoma
1336	DOID:11714	gestational diabetes
1337	DOID:3590	gestational trophoblastic neoplasm
1338	DOID:3074	giant cell glioblastoma
1339	DOID:1866	giant cell reparative granuloma
1340	DOID:200	giant cell tumor
1341	DOID:2457	giant papillary conjunctivitis
1342	DOID:10718	giardiasis
1343	DOID:2446	gigantism
1344	DOID:1483	gingival disease
1345	DOID:5338	gingival hypertrophy
1346	DOID:3086	gingival overgrowth
1347	DOID:1134	gingival recession
1348	DOID:3087	gingivitis
1349	DOID:155	glandular and epithelial neoplasm
1350	DOID:2392	glandular cystitis
1351	DOID:1686	glaucoma
1352	DOID:3068	glioblastoma
1353	DOID:3071	gliosarcoma
1354	DOID:2921	glomerulonephritis
1355	DOID:2431	glomus tumor
1356	DOID:7031	glottis squamous cell carcinoma
1357	DOID:14080	glucocorticoid-remediable aldosteronism
1358	DOID:10603	glucose intolerance
1359	DOID:4194	glucose metabolism disease
1360	DOID:2862	glucosephosphate dehydrogenase deficiency
1361	DOID:9268	glycine encephalopathy
1362	DOID:2748	glycogen storage disease III
1363	DOID:2752	glycogen storage disease II
1364	DOID:2750	glycogen storage disease IV
1365	DOID:0050594	glycogen storage disease IX
1366	DOID:2749	glycogen storage disease I
1367	DOID:11721	glycogen storage disease VII
1368	DOID:2754	glycogen storage disease VI
1369	DOID:2746	glycogen storage disease V
1370	DOID:0050579	glycogen storage disease XV
1371	DOID:2747	glycogen storage disease
1372	DOID:12176	goiter
1373	DOID:14447	gonadal dysgenesis
1374	DOID:194	gonadal tissue neoplasm
1375	DOID:3301	gonadoblastoma
1376	DOID:7551	gonorrhea
1377	DOID:13189	gout
1378	DOID:11350	grand mal status epilepticus
1379	DOID:4903	granular cell carcinoma
1380	DOID:2411	granular cell tumor
1381	DOID:2999	granulosa cell tumor
1382	DOID:12017	group B streptococcal pneumonia
1383	DOID:6255	growth hormone secreting pituitary adenoma
1384	DOID:12698	gynecomastia
1385	DOID:1415	gyrate atrophy
1386	DOID:11946	habitual abortion
1387	DOID:421	hair disease
1388	DOID:285	hairy cell leukemia
1389	DOID:5981	hamartoma of hypothalamus
1390	DOID:3472	hamartoma of lung
1391	DOID:3462	hamartoma
1392	DOID:3158	hand dermatosis
1393	DOID:14472	hantavirus pulmonary syndrome
1394	DOID:11934	head and neck cancer
1395	DOID:5520	head and neck squamous cell carcinoma
1396	DOID:449	head neoplasm
1397	DOID:12226	hearing disease
1398	DOID:117	heart cancer
1399	DOID:10273	heart conduction disease
1400	DOID:114	heart disease
1401	DOID:1681	heart septal defect
1402	DOID:4079	heart valve disease
1403	DOID:5241	hemangioblastoma
1404	DOID:255	hemangioma
1405	DOID:801	hemarthrosis
1406	DOID:2531	hematologic cancer
1407	DOID:12448	hematologic pregnancy complication
1408	DOID:74	hematopoietic system disease
1409	DOID:10969	hemiplegia
1410	DOID:2352	hemochromatosis
1411	DOID:2859	hemoglobin C disease
1412	DOID:2860	hemoglobinopathy
1413	DOID:582	hemoglobinuria
1414	DOID:583	hemolytic anemia
1415	DOID:12554	hemolytic-uremic syndrome
1416	DOID:11482	hemopericardium
1417	DOID:0050120	hemophagocytic lymphohistiocytosis
1418	DOID:12259	hemophilia B
1419	DOID:2230	hemophilia
1420	DOID:11248	hemorrhagic disease of newborn
1421	DOID:2213	hemorrhagic disease
1422	DOID:11266	hemorrhagic fever with renal syndrome
1423	DOID:2224	hemorrhagic thrombocythemia
1424	DOID:9746	hemorrhoid
1425	DOID:12119	hemosiderosis
1426	DOID:12550	hepatic coma
1427	DOID:13413	hepatic encephalopathy
1428	DOID:11512	hepatic vein thrombosis
1429	DOID:12549	hepatitis A
1430	DOID:2043	hepatitis B
1431	DOID:1883	hepatitis C
1432	DOID:2047	hepatitis D
1433	DOID:4411	hepatitis E
1434	DOID:2237	hepatitis
1435	DOID:687	hepatoblastoma
1436	DOID:684	hepatocellular carcinoma
1437	DOID:900	hepatopulmonary syndrome
1438	DOID:11823	hepatorenal syndrome
1439	DOID:5183	hereditary Wilms' tumor
1440	DOID:14735	hereditary angioedema
1441	DOID:5683	hereditary breast ovarian cancer
1442	DOID:3212	hereditary central nervous system demyelinating disease
1443	DOID:13269	hereditary coproporphyria
1444	DOID:2373	hereditary elliptocytosis
1445	DOID:9869	hereditary fructose intolerance syndrome
1446	DOID:1270	hereditary hemorrhagic telangiectasia
1447	DOID:0050580	hereditary lymphedema
1448	DOID:0050448	hereditary mucosal leukokeratosis
1449	DOID:206	hereditary multiple exostoses
1450	DOID:208	hereditary neoplastic syndrome
1451	DOID:8498	hereditary night blindness
1452	DOID:0050586	hereditary nonpolyposis colorectal cancer
1453	DOID:11533	hereditary sensory and autonomic neuropathy
1454	DOID:0050548	hereditary sensory neuropathy
1455	DOID:2476	hereditary spastic paraplegia
1456	DOID:12971	hereditary spherocytosis
1457	DOID:3763	hermaphroditism
1458	DOID:9976	heroin dependence
1459	DOID:10883	herpangina
1460	DOID:14482	herpes gestationis
1461	DOID:8566	herpes simplex
1462	DOID:8536	herpes zoster
1463	DOID:12642	hiatus hernia
1464	DOID:2280	hidradenitis suppurativa
1465	DOID:0060168	histidinemia
1466	DOID:474	histiocytoid hemangioma
1467	DOID:3405	histiocytosis
1468	DOID:1731	histoplasmosis
1469	DOID:859	holocarboxylase synthetase deficiency
1470	DOID:4621	holoprosencephaly
1471	DOID:9263	homocystinuria
1472	DOID:2791	hookworm infectious disease
1473	DOID:9909	hordeolum
1474	DOID:9912	hydrocele
1475	DOID:10908	hydrocephalus
1476	DOID:11111	hydronephrosis
1477	DOID:11212	hydrophthalmos
1478	DOID:1097	hydrops fetalis
1479	DOID:446	hyperaldosteronism
1480	DOID:11613	hyperandrogenism
1481	DOID:9278	hyperargininemia
1482	DOID:12678	hypercalcemia
1483	DOID:2487	hypercholesterolemia
1484	DOID:9357	hyperemesis gravidarum
1485	DOID:3403	hypergammaglobulinemia
1486	DOID:4195	hyperglycemia
1487	DOID:9279	hyperhomocysteinemia
1488	DOID:13317	hyperinsulinemic hypoglycemia
1489	DOID:2018	hyperinsulinism
1490	DOID:14451	hyperkalemic periodic paralysis
1491	DOID:3145	hyperlipoproteinemia type III
1492	DOID:1172	hyperlipoproteinemia type IV
1493	DOID:1171	hyperlipoproteinemia type V
1494	DOID:9274	hyperlysinemia
1495	DOID:0050544	hypermethioninemia
1496	DOID:9834	hyperopia
1497	DOID:205	hyperostosis
1498	DOID:13543	hyperparathyroidism
1499	DOID:0050459	hyperphosphatemia
1500	DOID:12700	hyperprolactinemia
1501	DOID:1205	hypersensitivity reaction type I disease
1502	DOID:417	hypersensitivity reaction type II disease
1503	DOID:1557	hypersensitivity reaction type III disease
1504	DOID:9809	hypersensitivity vasculitis
1505	DOID:6376	hypersplenism
1506	DOID:10763	hypertension
1507	DOID:11516	hypertensive heart disease
1508	DOID:11561	hypertensive retinopathy
1509	DOID:7998	hyperthyroidism
1510	DOID:2855	hyperthyroxinemia
1511	DOID:420	hypertrichosis
1512	DOID:11984	hypertrophic cardiomyopathy
1513	DOID:12638	hypertrophic pyloric stenosis
1514	DOID:1920	hyperuricemia
1515	DOID:13868	hypoactive sexual desire disorder
1516	DOID:12251	hypoaldosteronism
1517	DOID:1390	hypobetalipoproteinemia
1518	DOID:0080041	hypochondroplasia
1519	DOID:11759	hypochromic anemia
1520	DOID:0050642	hypochromic microcytic anemia
1521	DOID:9993	hypoglycemia
1522	DOID:1924	hypogonadism
1523	DOID:14793	hypohidrotic ectodermal dysplasia
1524	DOID:4500	hypokalemia
1525	DOID:14452	hypokalemic periodic paralysis
1526	DOID:1387	hypolipoproteinemia
1527	DOID:11199	hypoparathyroidism
1528	DOID:8533	hypopharynx cancer
1529	DOID:14213	hypophosphatasia
1530	DOID:0050336	hypophosphatemia
1531	DOID:9406	hypopituitarism
1532	DOID:9955	hypoplastic left heart syndrome
1533	DOID:10892	hypospadias
1534	DOID:1931	hypothalamic disease
1535	DOID:1459	hypothyroidism
1536	DOID:4535	hypotrichosis
1537	DOID:1702	ichthyosis vulgaris
1538	DOID:1697	ichthyosis
1539	DOID:11911	idiopathic familial dystonia
1540	DOID:1827	idiopathic generalized epilepsy
1541	DOID:11604	idiopathic hydrops fetalis
1542	DOID:2797	idiopathic interstitial pneumonia
1543	DOID:12559	idiopathic juvenile osteoporosis
1544	DOID:0050156	idiopathic pulmonary fibrosis
1545	DOID:11606	ileal disease
1546	DOID:10156	ileal neoplasm
1547	DOID:10153	ileum cancer
1548	DOID:8440	ileus
1549	DOID:12040	immune hydrops fetalis
1550	DOID:2914	immune system disease
1551	DOID:0060025	immunoglobulin alpha deficiency
1552	DOID:10488	imperforate anus
1553	DOID:1875	impotence
1554	DOID:10937	impulse control disorder
1555	DOID:8719	in situ carcinoma
1556	DOID:3401	inappropriate ADH syndrome
1557	DOID:3648	inborn errors pyruvate metabolism
1558	DOID:889	inborn metabolic brain disease
1559	DOID:3429	inclusion body myositis
1560	DOID:3156	incontinentia pigmenti achromians
1561	DOID:4660	indolent systemic mastocytosis
1562	DOID:11603	infant gynecomastia
1563	DOID:2481	infantile epileptic encephalopathy
1564	DOID:0050556	infantile onset spinocerebellar ataxia
1565	DOID:0050444	infantile refsum disease
1566	DOID:3412	infectious canine hepatitis
1567	DOID:8568	infectious mononucleosis
1568	DOID:12715	infectious myositis
1569	DOID:5223	infertility
1570	DOID:0050589	inflammatory bowel disease
1571	DOID:6263	inflammatory breast carcinoma
1572	DOID:10510	influenza virus pneumonia
1573	DOID:8469	influenza
1574	DOID:2214	inherited blood coagulation disease
1575	DOID:655	inherited metabolic disorder
1576	DOID:7316	inherited neuropathy
1577	DOID:3892	insulinoma
1578	DOID:1059	intellectual disability
1579	DOID:8805	intermediate coronary syndrome
1580	DOID:0050530	intermediate spinal muscular atrophy
1581	DOID:12732	intermediate uveitis
1582	DOID:3669	intermittent claudication
1583	DOID:12401	intermittent explosive disorder
1584	DOID:538	internuclear ophthalmoplegia
1585	DOID:13949	interstitial cystitis
1586	DOID:3082	interstitial lung disease
1587	DOID:1063	interstitial nephritis
1588	DOID:10486	intestinal atresia
1589	DOID:10155	intestinal cancer
1590	DOID:5295	intestinal disease
1591	DOID:4610	intestinal neoplasm
1592	DOID:8437	intestinal obstruction
1593	DOID:2074	intestinal perforation
1594	DOID:3878	intestinal pseudo-obstruction
1595	DOID:0050597	intestinal schistosomiasis
1596	DOID:4904	intestinal type carcinoma
1597	DOID:10941	intracranial aneurysm
1598	DOID:13089	intracranial arterial disease
1599	DOID:13097	intracranial arteriosclerosis
1600	DOID:4372	intracranial embolism
1601	DOID:9428	intracranial hypertension
1602	DOID:2124	intracranial neoplasm
1603	DOID:3572	intracranial sinus thrombosis
1604	DOID:4193	intracranial thrombosis
1605	DOID:13100	intracranial vasospasm
1606	DOID:2547	intractable epilepsy
1607	DOID:2424	intradermal nevus
1608	DOID:5616	intraepithelial neoplasm
1609	DOID:1852	intrahepatic cholestasis
1610	DOID:468	intramuscular hemangioma
1611	DOID:775	intraocular lymphoma
1612	DOID:6039	intraocular melanoma
1613	DOID:4141	intraorbital meningioma
1614	DOID:3772	intraventricular meningioma
1615	DOID:9360	intrinsic asthma
1616	DOID:8446	intussusception
1617	DOID:3008	invasive ductal carcinoma
1618	DOID:3457	invasive lobular carcinoma
1619	DOID:6945	inverted follicular keratosis
1620	DOID:3179	inverted papilloma
1621	DOID:9383	iridocyclitis
1622	DOID:11758	iron deficiency anemia
1623	DOID:2351	iron metabolism disease
1624	DOID:2350	iron overload
1625	DOID:9778	irritable bowel syndrome
1626	DOID:2772	irritant dermatitis
1627	DOID:326	ischemia
1628	DOID:3394	ischemic heart disease
1629	DOID:12010	ischemic optic neuropathy
1630	DOID:1799	islet cell tumor
1631	DOID:14753	isovaleric acidemia
1632	DOID:13499	jejunal cancer
1633	DOID:3218	jejunal neoplasm
1634	DOID:3209	junctional epidermolysis bullosa
1635	DOID:0060172	juvenile absence epilepsy
1636	DOID:1068	juvenile glaucoma
1637	DOID:0050458	juvenile myelomonocytic leukemia
1638	DOID:4890	juvenile myoclonic epilepsy
1639	DOID:6811	juvenile pilocytic astrocytoma
1640	DOID:676	juvenile rheumatoid arthritis
1641	DOID:12376	juvenile spinal muscular atrophy
1642	DOID:4677	keratitis
1643	DOID:12895	keratoconjunctivitis sicca
1644	DOID:10126	keratoconus
1645	DOID:11267	keratomalacia
1646	DOID:2734	keratosis follicularis
1647	DOID:161	keratosis
1648	DOID:2382	kernicterus
1649	DOID:263	kidney cancer
1650	DOID:557	kidney disease
1651	DOID:1074	kidney failure
1652	DOID:3674	kidney rhabdoid cancer
1653	DOID:12400	kleptomania
1654	DOID:648	kuru encephalopathy
1655	DOID:13579	kwashiorkor
1656	DOID:4667	kyphosis
1657	DOID:1001	labor complications
1658	DOID:1400	lacrimal apparatus disease
1659	DOID:3650	lactic acidosis
1660	DOID:10604	lactose intolerance
1661	DOID:93	language disorder
1662	DOID:4552	large cell carcinoma
1663	DOID:3857	large cell medulloblastoma
1664	DOID:5672	large intestine cancer
1665	DOID:2598	laryngeal benign neoplasm
1666	DOID:2600	laryngeal carcinoma
1667	DOID:786	laryngeal disease
1668	DOID:2876	laryngeal squamous cell carcinoma
1669	DOID:2596	larynx cancer
1670	DOID:10071	larynx squamous papilloma
1671	DOID:11862	late pregnancy
1672	DOID:3522	lateral medullary syndrome
1673	DOID:230	lateral sclerosis
1674	DOID:8927	learning disability
1675	DOID:705	leber hereditary optic neuropathy
1676	DOID:3142	leg dermatosis
1677	DOID:10458	legionellosis
1678	DOID:5132	leiomyoma cutis
1679	DOID:5138	leiomyomatosis
1680	DOID:127	leiomyoma
1681	DOID:1967	leiomyosarcoma
1682	DOID:9065	leishmaniasis
1683	DOID:110	lens disease
1684	DOID:10887	lepromatous leprosy
1685	DOID:1024	leprosy
1686	DOID:4956	leptomeningeal neoplasm
1687	DOID:2297	leptospirosis
1688	DOID:12528	lesion of sciatic nerve
1689	DOID:9072	lethal midline granuloma
1690	DOID:1240	leukemia
1691	DOID:6612	leukocyte adhesion deficiency
1692	DOID:9500	leukocyte disease
1693	DOID:611	leukocyte-adhesion deficiency syndrome
1694	DOID:10579	leukodystrophy
1695	DOID:644	leukoencephalopathy
1696	DOID:615	leukopenia
1697	DOID:12986	leukostasis
1698	DOID:9201	lichen planus
1699	DOID:11724	limb-girdle muscular dystrophy
1700	DOID:1577	limited scleroderma
1701	DOID:9854	lingual-facial-buccal dyskinesia
1702	DOID:4023	linitis plastica
1703	DOID:8564	lip cancer
1704	DOID:3146	lipid metabolism disorder
1705	DOID:9455	lipid storage disease
1706	DOID:11712	lipoatrophic diabetes
1707	DOID:811	lipodystrophy
1708	DOID:10966	lipoid nephrosis
1709	DOID:14498	lipoid proteinosis
1710	DOID:3153	lipomatosis
1711	DOID:3315	lipoma
1712	DOID:3382	liposarcoma
1713	DOID:0050453	lissencephaly
1714	DOID:11573	listeriosis
1715	DOID:3571	liver cancer
1716	DOID:686	liver carcinoma
1717	DOID:5082	liver cirrhosis
1718	DOID:409	liver disease
1719	DOID:12722	liver metastasis
1720	DOID:916	liver neoplasm
1721	DOID:3010	lobular neoplasia
1722	DOID:8472	localized scleroderma
1723	DOID:12697	locked-in syndrome
1724	DOID:2843	long QT syndrome
1725	DOID:13544	low tension glaucoma
1726	DOID:3910	lung adenocarcinoma
1727	DOID:3683	lung benign neoplasm
1728	DOID:1324	lung cancer
1729	DOID:3905	lung carcinoma
1730	DOID:850	lung disease
1731	DOID:5583	lung giant cell carcinoma
1732	DOID:2158	lung metastasis
1733	DOID:5411	lung oat cell carcinoma
1734	DOID:5409	lung small cell carcinoma
1735	DOID:3907	lung squamous cell carcinoma
1736	DOID:8857	lupus erythematosus
1737	DOID:5380	lupus vulgaris
1738	DOID:4889	lymph node tuberculosis
1739	DOID:1602	lymphadenitis
1740	DOID:2402	lymphangiectasis
1741	DOID:3319	lymphangioleiomyomatosis
1742	DOID:1475	lymphangioma
1743	DOID:2642	lymphangiomyoma
1744	DOID:75	lymphatic system disease
1745	DOID:4977	lymphedema
1746	DOID:1037	lymphoblastic leukemia
1747	DOID:5660	lymphoepithelioma-like carcinoma
1748	DOID:13819	lymphogranuloma venereum
1749	DOID:10747	lymphoid leukemia
1750	DOID:0060058	lymphoma
1751	DOID:614	lymphopenia
1752	DOID:619	lymphoproliferative disease
1753	DOID:8675	lymphosarcoma
1754	DOID:3211	lysosomal storage metabolic disease
1755	DOID:2186	macrocephaly
1756	DOID:9080	macroglobulinemia
1757	DOID:2565	macular corneal dystrophy
1758	DOID:4448	macular degeneration
1759	DOID:7633	macular holes
1760	DOID:4449	macular retinal edema
1761	DOID:13581	magnesium deficiency
1762	DOID:1470	major depressive disorder
1763	DOID:8477	malabsorption syndrome
1764	DOID:12365	malaria
1765	DOID:1614	male breast cancer
1766	DOID:12336	male infertility
1767	DOID:3856	male reproductive organ cancer
1768	DOID:48	male reproductive system disease
1769	DOID:1907	malignant fibroxanthoma
1770	DOID:3070	malignant glioma
1771	DOID:8580	malignant histiocytosis
1772	DOID:10824	malignant hypertension
1773	DOID:8545	malignant hyperthermia
1774	DOID:1790	malignant mesothelioma
1775	DOID:3680	malignant neoplasm of lip, oral cavity and pharynx
1776	DOID:2227	malignant neoplasm of lymphatic and hemopoietic tissue
1777	DOID:5073	malignant neoplasm of meninges
1778	DOID:4217	malignant ovarian Brenner tumor
1779	DOID:5940	malignant peripheral nerve sheath tumor
1780	DOID:13906	malignant pleural effusion
1781	DOID:7474	malignant pleural mesothelioma
1782	DOID:5563	malignant teratoma
1783	DOID:8452	malnutrition
1784	DOID:2338	mandibular cancer
1785	DOID:9269	maple syrup urine disease
1786	DOID:12328	marasmus
1787	DOID:9254	mast-cell leukemia
1788	DOID:10690	mastitis
1789	DOID:350	mastocytosis
1790	DOID:0050524	maturity-onset diabetes of the young
1791	DOID:4618	maxillary neoplasm
1792	DOID:2051	maxillary sinusitis
1793	DOID:8622	measles
1794	DOID:11049	meconium aspiration syndrome
1795	DOID:5559	mediastinal cancer
1796	DOID:3974	medullary carcinoma
1797	DOID:12713	medullary sponge kidney
1798	DOID:3858	medulloblastoma
1799	DOID:4790	medulloepithelioma
1800	DOID:3861	medullomyoblastoma
1801	DOID:11372	megacolon
1802	DOID:8761	megakaryocytic leukemia
1803	DOID:13382	megaloblastic anemia
1804	DOID:2848	melancholia
1805	DOID:2417	melanocytic nevus
1806	DOID:1909	melanoma
1807	DOID:166	melanotic neuroectodermal tumor
1808	DOID:5052	melioidosis
1809	DOID:4253	melorheostosis
1810	DOID:2920	membranoproliferative glomerulonephritis
1811	DOID:10976	membranous glomerulonephritis
1812	DOID:3565	meningioma
1813	DOID:9471	meningitis
1814	DOID:2515	meningococcal infectious disease
1815	DOID:9929	meningococcal meningitis
1816	DOID:10554	meningoencephalitis
1817	DOID:7212	meningothelial meningioma
1818	DOID:1596	mental depression
1819	DOID:0050329	mental disorder
1820	DOID:4545	mesenchymal chondrosarcoma
1821	DOID:3467	mesenchymal hamartoma
1822	DOID:13252	mesenteric vascular occlusion
1823	DOID:4772	mesoblastic nephroma
1824	DOID:637	metabolic brain disease
1825	DOID:3487	metabolic skin disease
1826	DOID:14221	metabolic syndrome X
1827	DOID:10581	metachromatic leukodystrophy
1828	DOID:896	metal metabolism disorder
1829	DOID:5652	metaplastic carcinoma
1830	DOID:10437	metastasis to lymph node
1831	DOID:13408	metastasis to pleura
1832	DOID:13212	metastasis to skin
1833	DOID:2874	metastasis to the neck
1834	DOID:3027	metastatic adenocarcinoma
1835	DOID:5865	metastatic chondrosarcoma
1836	DOID:927	metastatic malignant neoplasm to brain
1837	DOID:4358	metastatic melanoma
1838	DOID:3384	metastatic osteosarcoma
1839	DOID:7486	metastatic renal cell carcinoma
1840	DOID:4099	metastatic squamous cell carcinoma
1841	DOID:10783	methemoglobinemia
1842	DOID:14749	methylmalonic acidemia
1843	DOID:0050715	methylmalonic aciduria and homocystinuria type cblC
1844	DOID:0050716	methylmalonic aciduria and homocystinuria type cblD
1845	DOID:0050717	methylmalonic aciduria and homocystinuria type cblF
1846	DOID:0050452	mevalonic aciduria
1847	DOID:10907	microcephaly
1848	DOID:5403	microcystic adenoma
1849	DOID:4594	microcystic meningioma
1850	DOID:11252	microcytic anemia
1851	DOID:5998	microglandular adenosis
1852	DOID:10541	microinvasive gastric cancer
1853	DOID:10629	microphthalmia
1854	DOID:3525	middle cerebral artery infarction
1855	DOID:11433	middle ear cholesteatoma
1856	DOID:10024	migraine with aura
1857	DOID:12783	migraine without aura
1858	DOID:6364	migraine
1859	DOID:9861	miliary tuberculosis
1860	DOID:4376	milk allergic reaction
1861	DOID:7894	mite infestation
1862	DOID:0080013	mitochondrial disease
1863	DOID:890	mitochondrial encephalomyopathy
1864	DOID:700	mitochondrial metabolism disease
1865	DOID:699	mitochondrial myopathy
1866	DOID:61	mitral valve disease
1867	DOID:11502	mitral valve insufficiency
1868	DOID:988	mitral valve prolapse
1869	DOID:1754	mitral valve stenosis
1870	DOID:154	mixed cell type cancer
1871	DOID:0050673	mixed cerebral palsy
1872	DOID:3492	mixed connective tissue disease
1873	DOID:5076	mixed glioma
1874	DOID:7912	mixed oligodendroglioma-astrocytoma
1875	DOID:8867	molluscum contagiosum
1876	DOID:0050472	monilethrix
1877	DOID:7442	monoclonal gammopathy of uncertain significance
1878	DOID:8527	monocytic leukemia
1879	DOID:3324	mood disorder
1880	DOID:11981	morbid obesity
1881	DOID:2560	morphine dependence
1882	DOID:2951	motion sickness
1883	DOID:683	motor neuritis
1884	DOID:231	motor neuron disease
1885	DOID:2477	motor peripheral neuropathy
1886	DOID:403	mouth disease
1887	DOID:480	movement disease
1888	DOID:3030	mucinous adenocarcinoma
1889	DOID:3603	mucinous cystadenocarcinoma
1890	DOID:2633	mucinous cystadenoma
1891	DOID:9155	mucocutaneous leishmaniasis
1892	DOID:4531	mucoepidermoid carcinoma
1893	DOID:3343	mucolipidosis
1894	DOID:12801	mucopolysaccharidosis III
1895	DOID:12799	mucopolysaccharidosis II
1896	DOID:12804	mucopolysaccharidosis IV
1897	DOID:12802	mucopolysaccharidosis I
1898	DOID:12803	mucopolysaccharidosis VII
1899	DOID:12800	mucopolysaccharidosis VI
1900	DOID:12798	mucopolysaccharidosis
1901	DOID:0050441	mucosulfatidosis
1902	DOID:0050436	mulibrey nanism
1903	DOID:2974	multicystic dysplastic kidney
1904	DOID:401	multidrug-resistant tuberculosis
1905	DOID:0050489	multinodular goiter
1906	DOID:4661	multiple chemical sensitivity
1907	DOID:3125	multiple endocrine neoplasia
1908	DOID:12721	multiple epiphyseal dysplasia
1909	DOID:4590	multiple meningiomas
1910	DOID:9538	multiple myeloma
1911	DOID:2377	multiple sclerosis
1912	DOID:4752	multiple system atrophy
1913	DOID:10264	mumps
1914	DOID:767	muscular atrophy
1915	DOID:0080000	muscular disease
1916	DOID:0050588	muscular dystrophy-dystroglycanopathy
1917	DOID:9884	muscular dystrophy
1918	DOID:17	musculoskeletal system disease
1919	DOID:4189	mutism
1920	DOID:437	myasthenia gravis
1921	DOID:8691	mycosis fungoides
1922	DOID:322	myelitis
1923	DOID:4972	myelodysplastic myeloproliferative cancer
1924	DOID:4971	myelofibrosis
1925	DOID:8692	myeloid leukemia
1926	DOID:2528	myeloid metaplasia
1927	DOID:8683	myeloid sarcoma
1928	DOID:5844	myocardial infarction
1929	DOID:9767	myocardial stunning
1930	DOID:820	myocarditis
1931	DOID:12707	myoclonic cerebellar dyssynergia
1932	DOID:2661	myoepithelioma
1933	DOID:2691	myoma
1934	DOID:423	myopathy
1935	DOID:11830	myopia
1936	DOID:668	myositis ossificans
1937	DOID:633	myositis
1938	DOID:450	myotonic disease
1939	DOID:11722	myotonic dystrophy
1940	DOID:11634	myxedema
1941	DOID:5268	myxoid leiomyosarcoma
1942	DOID:5363	myxoid liposarcoma
1943	DOID:5075	myxopapillary ependymoma
1944	DOID:4123	nail disease
1945	DOID:9467	nail-patella syndrome
1946	DOID:2745	narcissistic personality disorder
1947	DOID:8986	narcolepsy
1948	DOID:10460	nasopharyngitis
1949	DOID:9261	nasopharynx carcinoma
1950	DOID:1035	natural killer cell leukemia
1951	DOID:1112	neck cancer
1952	DOID:1542	neck carcinoma
1953	DOID:4725	neck neoplasm
1954	DOID:3191	nemaline myopathy
1955	DOID:11244	neonatal anemia
1956	DOID:11717	neonatal diabetes mellitus
1957	DOID:2383	neonatal jaundice
1958	DOID:14072	neoplastic pregnancy complications
1959	DOID:10952	nephritis
1960	DOID:2154	nephroblastoma
1961	DOID:12679	nephrocalcinosis
1962	DOID:7334	nephrogenic adenoma
1963	DOID:12387	nephrogenic diabetes insipidus
1964	DOID:585	nephrolithiasis
1965	DOID:12712	nephronophthisis
1966	DOID:11664	nephrosclerosis
1967	DOID:2527	nephrosis
1968	DOID:1184	nephrotic syndrome
1969	DOID:12113	nerve deafness
1970	DOID:3093	nervous system cancer
1971	DOID:863	nervous system disease
1972	DOID:894	nervous system heredodegenerative disease
1973	DOID:3204	neurilemmomatosis
1974	DOID:3192	neurilemmoma
1975	DOID:1803	neuritis
1976	DOID:2367	neuroaxonal dystrophy
1977	DOID:769	neuroblastoma
1978	DOID:11569	neurocirculatory asthenia
1979	DOID:1289	neurodegenerative disease
1980	DOID:3309	neurodermatitis
1981	DOID:171	neuroectodermal tumor
1982	DOID:1800	neuroendocrine carcinoma
1983	DOID:169	neuroendocrine tumor
1984	DOID:3094	neuroepithelial neoplasm
1985	DOID:8712	neurofibromatosis
1986	DOID:962	neurofibroma
1987	DOID:3512	neurofibrosarcoma
1988	DOID:12143	neurogenic bladder
1989	DOID:12388	neurohypophyseal diabetes insipidus
1990	DOID:14464	neuroleptic malignant syndrome
1991	DOID:0060052	neurological disorder
1992	DOID:2001	neuroma
1993	DOID:440	neuromuscular disease
1994	DOID:8869	neuromyelitis optica
1995	DOID:14503	neuronal ceroid-lipofuscinosis
1996	DOID:870	neuropathy
1997	DOID:10176	neuroretinitis
1998	DOID:4964	neurotic disorder
1999	DOID:1227	neutropenia
[truncated: 803 more rows]

## Sheet: miRNAs
miRNA id	miRNA mature id
1	hsa-let-7a-5p
2	hsa-let-7a-3p
3	hsa-let-7b-5p
4	hsa-let-7b-3p
5	hsa-let-7c-5p
6	hsa-let-7d-5p
7	hsa-let-7d-3p
8	hsa-let-7e-5p
9	hsa-let-7e-3p
10	hsa-let-7f-5p
11	hsa-miR-15a-5p
12	hsa-miR-16-5p
13	hsa-miR-17-5p
14	hsa-miR-17-3p
15	hsa-miR-18a-5p
16	hsa-miR-18a-3p
17	hsa-miR-19a-3p
18	hsa-miR-19b-3p
19	hsa-miR-20a-5p
20	hsa-miR-21-5p
21	hsa-miR-22-3p
22	hsa-miR-23a-3p
23	hsa-miR-24-1-5p
24	hsa-miR-24-3p
25	hsa-miR-25-3p
26	hsa-miR-26a-5p
27	hsa-miR-26b-5p
28	hsa-miR-27a-5p
29	hsa-miR-27a-3p
30	hsa-miR-28-5p
31	hsa-miR-29a-3p
32	hsa-miR-30a-5p
33	hsa-miR-30a-3p
34	hsa-miR-31-5p
35	hsa-miR-32-5p
36	hsa-miR-32-3p
37	hsa-miR-33a-5p
38	hsa-miR-92a-3p
39	hsa-miR-93-5p
40	hsa-miR-95-5p
41	hsa-miR-95-3p
42	hsa-miR-96-5p
43	hsa-miR-98-5p
44	hsa-miR-99a-5p
45	hsa-miR-100-5p
46	hsa-miR-101-3p
47	hsa-miR-29b-3p
48	hsa-miR-103a-3p
49	hsa-miR-105-5p
50	hsa-miR-106a-5p
51	hsa-miR-106a-3p
52	hsa-miR-107
53	hsa-miR-192-5p
54	hsa-miR-196a-5p
55	hsa-miR-197-3p
56	hsa-miR-198
57	hsa-miR-199a-5p
58	hsa-miR-208a-3p
59	hsa-miR-129-5p
60	hsa-miR-148a-3p
61	hsa-miR-30c-5p
62	hsa-miR-30d-5p
63	hsa-miR-139-5p
64	hsa-miR-147a
65	hsa-miR-7-5p
66	hsa-miR-7-1-3p
67	hsa-miR-10a-5p
68	hsa-miR-10b-5p
69	hsa-miR-34a-5p
70	hsa-miR-34a-3p
71	hsa-miR-181a-5p
72	hsa-miR-181b-5p
73	hsa-miR-181c-5p
74	hsa-miR-182-5p
75	hsa-miR-182-3p
76	hsa-miR-183-5p
77	hsa-miR-187-3p
78	hsa-miR-199b-5p
79	hsa-miR-203a-3p
80	hsa-miR-204-5p
81	hsa-miR-205-5p
82	hsa-miR-210-5p
83	hsa-miR-210-3p
84	hsa-miR-211-5p
85	hsa-miR-212-3p
86	hsa-miR-181a-3p
87	hsa-miR-214-3p
88	hsa-miR-215-5p
89	hsa-miR-216a-5p
90	hsa-miR-217
91	hsa-miR-218-5p
92	hsa-miR-219a-5p
93	hsa-miR-221-3p
94	hsa-miR-222-3p
95	hsa-miR-223-3p
96	hsa-miR-224-5p
97	hsa-miR-200b-3p
98	hsa-let-7g-5p
99	hsa-let-7i-5p
100	hsa-miR-1-3p
101	hsa-miR-15b-5p
102	hsa-miR-23b-3p
103	hsa-miR-27b-3p
104	hsa-miR-30b-5p
105	hsa-miR-30b-3p
106	hsa-miR-122-5p
107	hsa-miR-124-3p
108	hsa-miR-125b-5p
109	hsa-miR-128-3p
110	hsa-miR-130a-3p
111	hsa-miR-132-3p
112	hsa-miR-133a-5p
113	hsa-miR-133a-3p
114	hsa-miR-135a-5p
115	hsa-miR-137
116	hsa-miR-138-5p
117	hsa-miR-140-5p
118	hsa-miR-140-3p
119	hsa-miR-141-3p
120	hsa-miR-142-5p
121	hsa-miR-142-3p
122	hsa-miR-143-3p
123	hsa-miR-144-5p
124	hsa-miR-144-3p
125	hsa-miR-145-5p
126	hsa-miR-152-5p
127	hsa-miR-152-3p
128	hsa-miR-153-3p
129	hsa-miR-191-5p
130	hsa-miR-9-5p
131	hsa-miR-9-3p
132	hsa-miR-125a-5p
133	hsa-miR-126-5p
134	hsa-miR-126-3p
135	hsa-miR-127-5p
136	hsa-miR-127-3p
137	hsa-miR-134-5p
138	hsa-miR-136-5p
139	hsa-miR-146a-5p
140	hsa-miR-146a-3p
141	hsa-miR-149-5p
142	hsa-miR-150-5p
143	hsa-miR-150-3p
144	hsa-miR-154-5p
145	hsa-miR-154-3p
146	hsa-miR-184
147	hsa-miR-185-5p
148	hsa-miR-186-5p
149	hsa-miR-188-5p
150	hsa-miR-190a-5p
151	hsa-miR-193a-3p
152	hsa-miR-194-5p
153	hsa-miR-195-5p
154	hsa-miR-195-3p
155	hsa-miR-206
156	hsa-miR-320a
157	hsa-miR-200c-3p
158	hsa-miR-155-5p
159	hsa-miR-128-2-5p
160	hsa-miR-106b-5p
161	hsa-miR-29c-3p
162	hsa-miR-200a-3p
163	hsa-miR-302a-3p
164	hsa-miR-34b-5p
165	hsa-miR-34b-3p
166	hsa-miR-34c-5p
167	hsa-miR-299-5p
168	hsa-miR-299-3p
169	hsa-miR-301a-3p
170	hsa-miR-99b-5p
171	hsa-miR-296-5p
172	hsa-miR-130b-5p
173	hsa-miR-130b-3p
174	hsa-miR-30e-5p
175	hsa-miR-30e-3p
176	hsa-miR-361-5p
177	hsa-miR-362-5p
178	hsa-miR-363-5p
179	hsa-miR-363-3p
180	hsa-miR-365a-3p
181	hsa-miR-365b-5p
182	hsa-miR-302b-5p
183	hsa-miR-302b-3p
184	hsa-miR-302c-5p
185	hsa-miR-302c-3p
186	hsa-miR-302d-3p
187	hsa-miR-367-3p
188	hsa-miR-376c-3p
189	hsa-miR-369-5p
190	hsa-miR-369-3p
191	hsa-miR-370-5p
192	hsa-miR-370-3p
193	hsa-miR-371a-3p
194	hsa-miR-372-5p
195	hsa-miR-372-3p
196	hsa-miR-373-5p
197	hsa-miR-373-3p
198	hsa-miR-374a-5p
199	hsa-miR-375
200	hsa-miR-376a-3p
201	hsa-miR-377-3p
202	hsa-miR-378a-5p
203	hsa-miR-379-5p
204	hsa-miR-381-3p
205	hsa-miR-382-5p
206	hsa-miR-383-5p
207	hsa-miR-340-5p
208	hsa-miR-340-3p
209	hsa-miR-330-3p
210	hsa-miR-328-5p
211	hsa-miR-328-3p
212	hsa-miR-342-3p
213	hsa-miR-337-3p
214	hsa-miR-323a-3p
215	hsa-miR-326
216	hsa-miR-151a-5p
217	hsa-miR-151a-3p
218	hsa-miR-135b-5p
219	hsa-miR-148b-3p
220	hsa-miR-331-3p
221	hsa-miR-324-5p
222	hsa-miR-324-3p
223	hsa-miR-338-3p
224	hsa-miR-339-5p
225	hsa-miR-335-5p
226	hsa-miR-133b
227	hsa-miR-325
228	hsa-miR-345-5p
229	hsa-miR-346
230	hsa-miR-384
231	hsa-miR-196b-5p
232	hsa-miR-422a
233	hsa-miR-423-3p
234	hsa-miR-424-5p
235	hsa-miR-425-5p
236	hsa-miR-18b-5p
237	hsa-miR-20b-5p
238	hsa-miR-448
239	hsa-miR-429
240	hsa-miR-449a
241	hsa-miR-450a-5p
242	hsa-miR-431-5p
243	hsa-miR-433-5p
244	hsa-miR-433-3p
245	hsa-miR-329-5p
246	hsa-miR-451a
247	hsa-miR-452-5p
248	hsa-miR-452-3p
249	hsa-miR-409-5p
250	hsa-miR-409-3p
251	hsa-miR-410-5p
252	hsa-miR-376b-3p
253	hsa-miR-483-3p
254	hsa-miR-484
255	hsa-miR-485-5p
256	hsa-miR-485-3p
257	hsa-miR-486-5p
258	hsa-miR-487a-3p
259	hsa-miR-488-5p
260	hsa-miR-489-5p
261	hsa-miR-489-3p
262	hsa-miR-490-3p
263	hsa-miR-491-5p
264	hsa-miR-511-5p
265	hsa-miR-146b-5p
266	hsa-miR-202-3p
267	hsa-miR-492
268	hsa-miR-493-5p
269	hsa-miR-493-3p
270	hsa-miR-432-5p
271	hsa-miR-432-3p
272	hsa-miR-494-5p
273	hsa-miR-494-3p
274	hsa-miR-495-3p
275	hsa-miR-193b-3p
276	hsa-miR-497-5p
277	hsa-miR-181d-5p
278	hsa-miR-512-5p
279	hsa-miR-498
280	hsa-miR-520e
281	hsa-miR-515-5p
282	hsa-miR-515-3p
283	hsa-miR-519e-3p
284	hsa-miR-520f-5p
285	hsa-miR-519c-3p
286	hsa-miR-520a-3p
287	hsa-miR-526b-5p
288	hsa-miR-519b-3p
289	hsa-miR-525-5p
290	hsa-miR-523-3p
291	hsa-miR-520b
292	hsa-miR-518b
293	hsa-miR-526a
294	hsa-miR-520c-5p
295	hsa-miR-520c-3p
296	hsa-miR-518c-5p
297	hsa-miR-518c-3p
298	hsa-miR-524-5p
299	hsa-miR-517a-3p
300	hsa-miR-519d-5p
301	hsa-miR-519d-3p
302	hsa-miR-521
303	hsa-miR-520g-5p
304	hsa-miR-516b-5p
305	hsa-miR-518a-3p
306	hsa-miR-517c-3p
307	hsa-miR-520h
308	hsa-miR-522-3p
309	hsa-miR-519a-3p
310	hsa-miR-527
311	hsa-miR-516a-5p
312	hsa-miR-516a-3p
313	hsa-miR-499a-5p
314	hsa-miR-500a-5p
315	hsa-miR-501-5p
316	hsa-miR-502-5p
317	hsa-miR-503-5p
318	hsa-miR-504-5p
319	hsa-miR-505-3p
320	hsa-miR-513a-5p
321	hsa-miR-506-3p
322	hsa-miR-507
323	hsa-miR-508-3p
324	hsa-miR-509-3p
325	hsa-miR-510-5p
326	hsa-miR-514a-3p
327	hsa-miR-532-5p
328	hsa-miR-455-5p
329	hsa-miR-539-5p
330	hsa-miR-544a
331	hsa-miR-545-3p
332	hsa-miR-487b-5p
333	hsa-miR-487b-3p
334	hsa-miR-551a
335	hsa-miR-552-5p
336	hsa-miR-92b-3p
337	hsa-miR-557
338	hsa-miR-561-3p
339	hsa-miR-563
340	hsa-miR-564
341	hsa-miR-566
342	hsa-miR-569
343	hsa-miR-570-3p
344	hsa-miR-571
345	hsa-miR-572
346	hsa-miR-573
347	hsa-miR-574-3p
348	hsa-miR-575
349	hsa-miR-577
350	hsa-miR-582-5p
351	hsa-miR-583
352	hsa-miR-584-5p
353	hsa-miR-548a-3p
354	hsa-miR-548b-3p
355	hsa-miR-550a-5p
356	hsa-miR-590-5p
357	hsa-miR-592
358	hsa-miR-593-5p
359	hsa-miR-595
360	hsa-miR-596
361	hsa-miR-598-5p
362	hsa-miR-598-3p
363	hsa-miR-600
364	hsa-miR-601
365	hsa-miR-602
366	hsa-miR-603
367	hsa-miR-608
368	hsa-miR-610
369	hsa-miR-611
370	hsa-miR-612
371	hsa-miR-613
372	hsa-miR-614
373	hsa-miR-615-3p
374	hsa-miR-616-5p
375	hsa-miR-548c-3p
376	hsa-miR-621
377	hsa-miR-622
378	hsa-miR-624-5p
379	hsa-miR-625-5p
380	hsa-miR-625-3p
381	hsa-miR-626
382	hsa-miR-627-5p
383	hsa-miR-628-3p
384	hsa-miR-629-5p
385	hsa-miR-630
386	hsa-miR-33b-5p
387	hsa-miR-632
388	hsa-miR-633
389	hsa-miR-636
390	hsa-miR-637
391	hsa-miR-638
392	hsa-miR-639
393	hsa-miR-640
394	hsa-miR-642a-5p
395	hsa-miR-646
396	hsa-miR-647
397	hsa-miR-650
398	hsa-miR-652-3p
399	hsa-miR-661
400	hsa-miR-662
401	hsa-miR-663a
402	hsa-miR-449b-5p
403	hsa-miR-411-5p
404	hsa-miR-654-5p
405	hsa-miR-655-5p
406	hsa-miR-656-5p
407	hsa-miR-657
408	hsa-miR-658
409	hsa-miR-659-3p
410	hsa-miR-660-5p
411	hsa-miR-421
412	hsa-miR-542-5p
413	hsa-miR-542-3p
414	hsa-miR-671-5p
415	hsa-miR-668-5p
416	hsa-miR-767-5p
417	hsa-miR-1224-5p
418	hsa-miR-151b
419	hsa-miR-320b
420	hsa-miR-320c
421	hsa-miR-1296-5p
422	hsa-miR-1323
423	hsa-miR-1271-5p
424	hsa-miR-1301-5p
425	hsa-miR-454-3p
426	hsa-miR-449c-5p
427	hsa-miR-769-5p
428	hsa-miR-766-3p
429	hsa-miR-378d
430	hsa-miR-802
431	hsa-miR-761
432	hsa-miR-765
433	hsa-miR-675-5p
434	hsa-miR-298
435	hsa-miR-300
436	hsa-miR-450b-5p
437	hsa-miR-874-5p
438	hsa-miR-708-5p
439	hsa-miR-147b
440	hsa-miR-190b
441	hsa-miR-744-5p
442	hsa-miR-885-5p
443	hsa-miR-885-3p
444	hsa-miR-877-5p
445	hsa-miR-873-5p
446	hsa-miR-543
447	hsa-miR-374b-5p
448	hsa-miR-760
449	hsa-miR-301b-3p
450	hsa-miR-216b-5p
451	hsa-miR-208b-5p
452	hsa-miR-922
453	hsa-miR-933
454	hsa-miR-940
455	hsa-miR-941
456	hsa-miR-942-5p
457	hsa-miR-944
458	hsa-miR-297
459	hsa-miR-1179
460	hsa-miR-1180-5p
461	hsa-miR-1181
462	hsa-miR-1183
463	hsa-miR-1228-5p
464	hsa-miR-1228-3p
465	hsa-miR-1229-3p
466	hsa-miR-1231
467	hsa-miR-1233-3p
468	hsa-miR-1234-3p
469	hsa-miR-1236-3p
470	hsa-miR-1238-3p
471	hsa-miR-1202
472	hsa-miR-1207-5p
473	hsa-miR-1285-3p
474	hsa-miR-1286
475	hsa-miR-1290
476	hsa-miR-1293
477	hsa-miR-1297
478	hsa-miR-1299
479	hsa-miR-1302
480	hsa-miR-1303
481	hsa-miR-1305
482	hsa-miR-1245a
483	hsa-miR-1246
484	hsa-miR-1247-5p
485	hsa-miR-1249-3p
486	hsa-miR-1254
487	hsa-miR-1256
488	hsa-miR-1258
489	hsa-miR-1260a
490	hsa-miR-1266-5p
491	hsa-miR-1269a
492	hsa-miR-1275
493	hsa-miR-302e
494	hsa-miR-302f
495	hsa-miR-664a-3p
496	hsa-miR-1307-3p
497	hsa-miR-513b-5p
498	hsa-miR-513c-5p
499	hsa-miR-1469
500	hsa-miR-1471
501	hsa-miR-103b
502	hsa-miR-320d
503	hsa-miR-1827
504	hsa-miR-1908-5p
505	hsa-miR-1909-3p
506	hsa-miR-1915-3p
507	hsa-miR-2110
508	hsa-miR-2278
509	hsa-miR-711
510	hsa-miR-718
511	hsa-miR-2861
512	hsa-miR-3127-5p
513	hsa-miR-3130-5p
514	hsa-miR-378b
515	hsa-miR-544b
516	hsa-miR-1273c
517	hsa-miR-3148
518	hsa-miR-3151-5p
519	hsa-miR-3163
520	hsa-miR-1260b
521	hsa-miR-323b-5p
522	hsa-miR-3179
523	hsa-miR-3186-5p
524	hsa-miR-320e
525	hsa-miR-3196
526	hsa-miR-4295
527	hsa-miR-378c
528	hsa-miR-4306
529	hsa-miR-4257
530	hsa-miR-2355-5p
531	hsa-miR-500b-5p
532	hsa-miR-3662
533	hsa-miR-3928-5p
534	hsa-miR-3940-3p
535	hsa-miR-642b-3p
536	hsa-miR-550b-3p
537	hsa-miR-378e
538	hsa-miR-378f
539	hsa-miR-4423-5p
540	hsa-miR-378g
541	hsa-miR-4458
542	hsa-miR-378h
543	hsa-miR-4487
544	hsa-miR-4500
545	hsa-miR-378i
546	hsa-miR-451b
547	hsa-miR-1245b-5p
548	hsa-miR-4792
549	hsa-miR-5100
550	hsa-miR-7515
551	hsa-miR-9500

## Sheet: positive_miR
disease id	miRNA id
1072	130
769	100
769	113
769	156
622	11
622	20
622	39
622	41
622	50
622	101
622	109
622	204
622	219
622	254
622	270
622	275
622	329
622	362
1750	13
1750	14
1750	17
1750	19
2260	20
2260	33
2260	57
2260	69
2260	78
2260	83
2260	87
2260	93
2260	94
2260	110
2260	111
2260	136
2260	144
2260	158
2260	170
2260	177
2260	203
2260	205
2260	265
2260	315
1042	20
1042	33
1042	57
1042	60
1042	69
1042	78
1042	83
1042	87
1042	93
1042	94
1042	95
1042	110
1042	111
1042	144
1042	158
1042	167
1042	170
1042	177
1042	189
1042	203
1042	204
1042	205
1042	219
1042	225
1042	247
1042	250
1042	265
1042	274
1042	315
1042	333
2649	124
2323	1
2323	3
2323	5
2323	10
2323	11
2323	12
2323	13
2323	14
2323	18
2323	19
2323	20
2323	22
2323	25
2323	27
2323	29
2323	31
2323	32
2323	34
2323	35
2323	38
2323	42
2323	44
2323	45
2323	46
2323	48
2323	50
2323	56
2323	57
2323	60
2323	61
2323	67
2323	68
2323	69
2323	72
2323	74
2323	75
2323	76
2323	78
2323	81
2323	83
2323	87
2323	91
2323	93
2323	94
2323	95
2323	96
2323	102
2323	103
2323	104
2323	108
2323	119
2323	125
2323	129
2323	133
2323	136
2323	139
2323	141
2323	146
2323	153
2323	170
2323	171
2323	184
2323	192
2323	196
2323	199
2323	209
2323	240
2323	266
2323	276
2323	279
2323	302
2323	317
870	11
870	12
870	17
870	46
870	52
870	53
870	62
870	69
870	71
870	72
870	76
870	86
870	93
870	95
870	102
870	111
870	119
870	122
870	125
870	128
870	137
870	144
870	150
870	153
870	158
870	234
2593	1
2593	12
2593	20
2593	25
2593	29
2593	39
2593	50
2593	52
2593	87
2593	93
2593	94
2593	95
2593	101
2593	122
2593	125
2593	129
2593	160
2593	246
2438	42
2438	74
2438	76
2438	100
2438	113
24	11
24	21
24	27
24	31
24	39
24	46
24	52
24	55
24	69
24	73
24	83
24	108
24	109
24	130
24	139
24	156
24	160
24	179
24	211
24	264
24	434
1506	158
2518	31
2518	71
2518	119
2518	246
2469	1
125	20
125	21
125	26
125	31
125	32
125	33
125	38
125	41
125	46
125	47
125	55
125	57
125	60
125	61
125	62
125	69
125	78
125	83
125	87
125	93
125	94
125	104
125	110
125	136
125	137
125	144
125	158
125	161
125	167
125	168
125	174
125	176
125	189
125	200
125	203
125	204
125	205
125	220
125	225
125	247
125	250
125	255
125	257
125	265
125	269
125	270
125	274
125	275
125	277
125	333
1699	3
1699	20
1699	33
1699	47
1699	55
1699	57
1699	60
1699	69
1699	78
1699	83
1699	87
1699	93
1699	94
1699	95
1699	110
1699	111
1699	137
1699	144
1699	158
1699	167
1699	170
1699	177
1699	200
1699	203
1699	204
1699	205
1699	219
1699	225
1699	247
1699	265
1699	269
1699	270
1699	274
1699	315
1699	333
1214	3
1214	20
1214	31
1214	47
1214	57
1214	69
1214	78
1214	87
1214	93
1214	94
1214	111
1214	144
1214	158
1214	170
1214	189
1214	203
1214	225
1214	265
1394	81
1394	83
1512	7
1512	32
1512	34
1512	58
1512	67
1512	68
1512	78
1512	91
1512	139
1512	141
1512	142
1512	153
1512	158
1512	174
1512	234
1512	236
1512	246
1512	257
2295	3
2295	13
2295	19
2295	26
2295	38
2295	47
2295	55
2295	59
2295	62
2295	85
2295	95
2295	113
2295	142
2295	167
2295	171
2295	176
2295	211
2295	215
2295	222
2295	226
2295	229
2295	246
2295	271
2295	273
2295	301
192	31
192	111
192	130
192	131
192	209
2743	5
2743	20
2743	29
2743	35
2743	47
2743	55
2743	67
2743	69
2743	79
2743	85
2743	102
2743	108
2743	124
2743	142
2743	161
2743	201
2743	225
2743	231
2743	246
2743	252
2743	257
2743	268
2743	279
2743	350
2743	394
2743	412
2743	413
1728	1
1728	3
1728	5
1728	6
1728	8
1728	10
1728	12
1728	13
1728	14
1728	15
1728	17
1728	19
1728	20
1728	21
1728	31
1728	32
1728	34
1728	35
1728	39
1728	41
1728	43
1728	44
1728	46
1728	47
1728	50
1728	53
1728	55
1728	56
1728	65
1728	74
1728	75
1728	76
1728	78
1728	79
1728	80
1728	81
1728	83
1728	85
1728	91
1728	96
1728	97
1728	98
1728	100
1728	103
1728	109
1728	110
1728	119
1728	122
1728	125
1728	129
1728	130
1728	131
1728	132
1728	133
1728	134
1728	139
1728	142
1728	153
1728	157
1728	158
1728	161
1728	162
1728	174
1728	175
1728	201
1728	221
1728	222
1728	225
1728	226
1728	228
1728	235
1728	239
1728	246
1728	265
1728	276
2404	42
2404	44
2404	55
2404	56
2404	68
2404	78
2404	109
2404	134
2404	152
2404	153
2404	206
2404	250
2404	273
2404	276
1141	157
121	5
121	44
121	158
121	430
275	65
275	226
275	244
725	1
725	6
725	10
725	13
725	15
725	19
725	20
725	21
725	26
725	29
725	33
725	34
725	42
725	43
725	47
725	54
725	60
725	65
725	68
725	71
725	72
725	74
725	79
725	80
725	81
725	83
725	86
725	93
725	94
725	97
725	99
725	108
725	109
725	119
725	122
725	125
725	127
725	129
725	134
725	138
725	141
725	153
725	155
725	156
725	157
725	158
725	161
725	162
725	180
725	197
725	225
725	239
725	246
725	265
725	266
725	275
725	276
725	277
725	312
725	325
725	399
725	401
2584	16
2755	20
2755	87
2755	108
2755	113
2755	122
2755	125
2755	139
2755	180
2668	140
1774	4
1774	9
1774	36
1774	66
1774	70
1774	79
1774	105
1774	123
1774	130
1774	154
1774	208
1774	228
1774	253
1774	350
1774	352
1774	359
1774	373
1774	443
1774	463
2104	6
2104	13
2104	19
2104	20
2104	22
2104	25
2104	44
2104	48
2104	50
2104	52
2104	61
2104	71
2104	79
2104	81
2104	87
2104	93
2104	95
2104	101
2104	102
2104	129
2104	139
2104	199
2104	219
2104	234
1806	1
1806	3
1806	6
1806	8
1806	14
1806	17
1806	29
1806	30
1806	34
1806	41
1806	42
1806	45
1806	47
1806	49
1806	50
1806	52
1806	57
1806	59
1806	69
1806	71
1806	74
1806	76
1806	78
1806	80
1806	83
1806	84
1806	86
1806	88
1806	92
1806	93
1806	94
1806	96
1806	97
1806	98
1806	102
1806	104
1806	108
1806	109
1806	114
1806	115
1806	116
1806	119
1806	124
1806	130
1806	136
1806	141
1806	144
1806	146
1806	150
1806	157
1806	162
1806	163
1806	166
1806	183
1806	185
1806	186
1806	198
1806	218
1806	220
1806	221
1806	227
1806	327
563	109
563	256
563	432
1055	201
1911	42
1911	121
1911	215
1911	236
1911	237
1911	263
1911	352
1911	492
1911	495
2085	1
2085	5
2085	6
2085	8
2085	10
2085	31
2085	32
2085	44
2085	45
2085	57
2085	68
2085	76
2085	87
2085	97
2085	98
2085	119
2085	120
2085	121
2085	130
2085	153
2085	157
2085	160
2085	161
2085	162
2085	171
2085	174
2085	176
2085	204
2085	225
2085	229
2085	232
2085	234
2085	265
2085	273
2085	279
2085	282
2085	292
2085	304
2085	323
2085	333
2085	334
2085	369
2085	377
2085	390
2085	400
2085	401
2085	413
1666	1
1666	20
1649	11
1649	13
1649	18
1649	19
1649	20
1649	26
1649	29
1649	30
1649	31
1649	46
1649	47
1649	50
1649	57
1649	74
1649	83
1649	87
1649	97
1649	106
1649	119
1649	129
1649	134
1649	142
1649	147
1649	157
1649	160
1649	161
1649	202
1649	207
1649	212
1649	216
1649	234
1649	237
1649	261
1649	327
1933	1
795	31
795	48
795	61
795	71
795	100
795	108
602	60
602	127
602	134
602	219
1147	19
1147	44
1147	45
1147	95
1147	97
1147	100
1147	108
1147	119
1147	121
1147	122
1147	125
1147	134
1147	142
1147	152
1147	161
1147	162
1147	166
1147	170
1147	180
1147	231
1147	234
1352	20
1352	46
1352	47
1352	83
1352	93
1352	109
1352	111
1352	113
1352	115
1352	128
1352	141
1352	145
1352	147
1352	158
1352	211
1352	226
1770	11
1770	12
1770	13
1770	17
1770	19
1770	20
1770	25
1770	26
1770	30
1770	71
1770	72
1770	83
1770	93
1770	94
1770	101
1770	146
1770	171
1770	173
1770	265
1338	20
1338	22
1338	68
1338	72
1338	110
1338	128
1338	129
1338	235
1338	246
1338	257
1954	1
1954	3
1954	33
1954	38
1954	47
1954	57
1954	60
1954	69
1954	78
1954	83
1954	87
1954	93
1954	94
1954	95
1954	104
1954	110
1954	111
1954	136
1954	137
1954	144
1954	158
1954	161
1954	167
1954	168
1954	170
1954	176
1954	177
1954	189
1954	200
1954	203
1954	204
1954	205
1954	219
1954	225
1954	247
1954	250
1954	265
1954	269
1954	270
1954	274
1954	277
1954	315
1954	333
2446	100
2446	155
2446	161
2639	163
1711	1
984	93
984	94
984	100
1559	20
1559	55
1559	69
1559	87
1559	93
1559	94
1559	95
1559	158
1559	204
1559	265
1391	1
1812	162
2536	79
2210	8
2210	11
2210	26
2210	27
2210	48
2210	55
2210	85
2210	95
2210	109
2210	111
2210	138
2210	141
1577	80
2012	1
2012	3
2012	6
2012	11
2012	12
2012	20
2012	42
2012	45
2012	52
2012	69
2012	75
2012	81
2012	93
2012	94
2012	98
2012	101
2012	108
2012	115
2012	130
2012	134
2012	147
2012	166
2012	195
461	87
461	146
461	264
461	317
1278	55
1278	229
2122	3
2122	11
2122	12
2122	20
2122	26
2122	47
2122	69
2122	71
2122	73
2122	78
2122	86
2122	93
2122	94
2122	139
2122	158
2122	161
2122	162
2122	228
2122	265
683	13
683	20
683	22
683	26
683	27
683	34
683	44
683	45
683	46
683	59
683	61
683	65
683	67
683	79
683	81
683	93
683	94
683	95
683	102
683	108
683	113
683	122
683	125
683	136
683	147
683	153
683	161
683	174
683	226
683	247
683	248
1718	5
1718	6
1718	8
1718	13
1718	20
1718	21
1718	34
1718	41
1718	48
1718	52
1718	61
1718	62
1718	68
1718	69
1718	76
1718	77
1718	79
1718	110
1718	111
1718	134
1718	144
1718	157
1934	3
1934	20
1934	33
1934	57
1934	60
1934	61
1934	69
1934	83
1934	87
1934	93
1934	94
1934	95
1934	110
1934	111
1934	144
1934	158
1934	167
1934	170
1934	177
1934	200
1934	203
1934	204
1934	205
1934	225
1934	250
1934	265
1934	270
1934	274
1934	333
812	5
812	20
812	87
812	102
812	122
812	231
2411	20
2411	98
2411	125
2411	156
2411	273
832	1
832	20
832	47
832	97
832	119
832	156
703	100
703	113
703	158
1924	95
1924	265
1181	20
1181	48
1181	52
1181	81
1181	95
1717	373
2474	11
2474	24
2474	27
2474	31
2474	32
2474	38
2474	47
2474	52
2474	56
2474	62
2474	65
2474	85
2474	101
2474	104
2474	131
2474	153
2474	155
2474	160
2474	161
2474	174
2474	229
2474	237
1395	6
1395	8
1395	11
1395	17
1395	20
1395	21
1395	34
1395	43
1395	46
1395	47
1395	55
1395	60
1395	65
1395	81
1395	83
1395	87
1395	93
1395	98
1395	99
1395	104
1395	113
1395	116
1395	119
1395	121
1395	129
1395	148
1395	153
1395	158
1395	161
1395	162
1395	174
1395	197
1395	198
1395	199
1395	219
1395	220
1395	234
1395	265
1395	273
1395	279
1395	339
1395	345
1395	390
1928	20
1928	100
964	20
964	22
964	24
964	57
964	87
964	100
964	108
964	153
1612	3
1612	57
1612	122
1612	275
1612	398
2363	13
2363	19
2308	212
447	1
2396	95
2396	130
1436	3
1436	5
1436	6
1436	8
1436	13
1436	14
1436	15
1436	18
1436	24
1436	26
1436	29
1436	34
1436	38
1436	39
1436	42
1436	44
1436	46
1436	57
1436	59
1436	60
1436	69
1436	73
1436	74
1436	75
1436	76
1436	78
1436	79
1436	81
1436	85
1436	87
1436	88
1436	93
1436	94
1436	95
1436	96
1436	97
1436	100
1436	102
1436	108
1436	110
1436	111
1436	113
1436	115
1436	119
1436	120
1436	121
1436	122
1436	125
1436	127
1436	130
1436	131
1436	133
1436	134
1436	136
1436	138
1436	139
1436	142
1436	147
1436	148
1436	152
1436	153
1436	158
1436	160
1436	162
1436	169
1436	174
1436	198
1436	219
1436	221
527	13
527	14
527	15
527	17
527	26
527	32
527	62
527	108
527	116
339	50
339	122
339	173
339	237
2440	8
2440	56
2440	69
2440	156
2440	196
2440	267
2440	273
2440	279
2440	296
2440	317
1977	3
1977	13
1977	31
1977	38
1977	39
1977	44
1977	47
1977	50
1977	69
1977	93
1977	102
1977	108
1977	130
1977	146
1977	161
873	13
873	19
873	67
873	79
873	95
188	1
188	12
188	15
188	19
188	20
188	32
188	54
188	104
188	114
188	130
188	148
188	158
188	162
188	198
188	286
188	372
2725	10
68	1
68	5
68	26
68	122
68	125
68	136
68	158
841	20
2348	8
2348	13
2348	19
2348	20
2348	21
2348	34
2348	45
2348	50
2348	55
2348	61
2348	67
2348	79
2348	88
2348	108
2348	119
2348	121
2348	139
2348	162
2348	170
2348	174
2348	180
2348	204
2348	215
2348	226
2348	265
2348	292
2348	298
2252	11
2252	13
2255	142
1756	131
1756	146
1756	155
1756	158
1756	178
1756	273
1756	413
436	1
436	3
436	5
436	8
436	20
436	21
436	22
436	24
436	26
436	29
436	33
436	38
436	47
436	48
436	57
436	62
436	64
436	71
436	72
436	73
436	74
436	78
436	80
436	83
436	93
436	94
436	95
436	101
436	102
436	103
436	109
436	110
436	120
436	131
436	133
436	134
436	146
436	153
436	156
436	158
436	166
436	173
436	182
436	186
436	187
436	195
436	198
436	207
436	211
436	215
436	220
436	221
436	225
436	227
436	234
436	246
1283	409
909	1
909	3
909	13
909	16
909	18
909	19
909	20
909	22
909	25
909	26
909	29
909	31
909	32
909	38
909	39
909	50
909	52
909	54
909	71
909	93
909	95
909	98
909	101
909	103
909	113
909	122
909	125
909	129
909	134
909	156
909	160
909	202
909	211
909	218
909	226
909	232
909	246
909	276
1949	45
1949	53
1949	85
1949	90
1949	166
2773	35
1051	31
1051	47
1051	161
1910	3
1910	8
1910	17
1910	18
1910	25
1910	35
1910	39
1910	71
1910	72
1910	118
1910	132
1910	160
1910	170
1910	225
1910	338
1625	325
45	93
45	265
434	1
434	3
434	8
434	20
434	22
434	29
434	78
434	79
434	93
434	94
434	95
434	103
434	109
434	110
434	158
434	173
434	225
434	231
434	234
434	246
434	438
2022	122

## Sheet: positive_HMDD
disease id	miRNA id
538	13
538	15
538	17
538	18
538	19
538	38
1072	69
168	108
463	12
463	13
463	15
463	17
463	18
463	19
463	38
463	79
463	81
463	120
463	158
463	215
463	246
463	401
463	509
1570	18
1570	20
1570	50
1570	96
1570	158
1570	384
2545	5
2545	20
2545	45
2545	47
2545	57
2545	69
2545	108
2545	122
2545	125
2545	503
769	20
769	29
769	57
769	78
769	87
2192	22
2192	92
2192	160
1750	11
1750	12
1750	13
1750	17
1750	19
1750	20
1750	38
1750	63
1750	79
1750	82
1750	97
1750	132
1750	134
1750	142
1750	146
1750	157
1750	162
1750	218
1750	228
1750	237
1750	257
1750	292
1750	313
1750	329
1750	355
1750	384
1750	438
2011	20
2011	158
2011	219
702	20
369	26
1644	146
1685	20
2323	1
2323	3
2323	5
2323	11
2323	12
2323	13
2323	19
2323	20
2323	25
2323	29
2323	31
2323	34
2323	35
2323	38
2323	39
2323	42
2323	43
2323	44
2323	45
2323	46
2323	50
2323	52
2323	56
2323	57
2323	60
2323	61
2323	62
2323	69
2323	72
2323	74
2323	76
2323	81
2323	87
2323	91
2323	93
2323	94
2323	95
2323	96
2323	100
2323	101
2323	102
2323	103
2323	106
2323	107
2323	108
2323	110
2323	111
2323	112
2323	119
2323	125
2323	126
2323	128
2323	129
2323	136
2323	139
2323	144
2323	147
2323	152
2323	153
2323	157
2323	160
2323	162
2323	164
2323	166
2323	170
2323	171
2323	173
2323	197
2323	199
2323	202
2323	209
2323	217
2323	218
2323	225
2323	226
2323	231
2323	240
2323	247
2323	249
2323	257
2323	259
2323	265
2323	295
2323	300
2323	302
2323	347
2323	374
2323	384
2323	394
2323	396
2323	418
2323	421
2323	429
2323	438
2323	449
2323	487
2323	514
2323	527
2323	535
2323	537
2323	538
2323	540
2323	542
2323	545
870	11
870	12
870	13
870	17
870	18
870	31
870	48
870	52
870	60
870	69
870	71
870	72
870	73
870	77
870	93
870	94
870	95
870	102
870	103
870	108
870	110
870	153
870	155
870	158
870	164
870	166
870	212
870	217
870	231
870	265
870	397
2593	1
2593	10
2593	12
2593	13
2593	19
2593	20
2593	21
2593	22
2593	24
2593	25
2593	27
2593	29
2593	39
2593	45
2593	48
2593	50
2593	52
2593	53
2593	57
2593	71
2593	72
2593	78
2593	85
2593	87
2593	93
2593	94
2593	95
2593	98
2593	101
2593	103
2593	106
2593	107
2593	108
2593	110
2593	122
2593	125
2593	129
2593	132
2593	134
2593	141
2593	142
2593	146
2593	147
2593	156
2593	160
2593	179
2593	199
2593	202
2593	219
2593	220
2593	226
2593	231
2593	237
2593	243
2593	246
2593	257
2593	275
2593	293
2593	299
2593	320
2593	332
2593	334
2593	347
2593	364
2593	397
2593	408
2593	418
2593	441
2593	464
2593	494
1578	115
2276	3
2276	13
2276	19
2276	20
2276	24
2276	26
2276	47
2276	48
2276	71
2276	74
2276	82
2276	109
2276	126
2276	158
2276	163
2276	173
2276	183
2276	185
2276	186
2276	212
2276	226
2276	227
2276	237
2276	297
2276	347
2276	403
2276	493
2276	494
2276	501
24	13
24	19
24	20
24	31
24	46
24	47
24	48
24	52
24	73
24	107
24	108
24	109
24	115
24	124
24	128
24	130
24	139
24	153
24	160
24	166
24	356
1651	158
1506	8
1506	13
1506	19
1506	20
1506	48
1506	80
1506	100
1506	106
1506	112
1506	125
1506	142
1506	158
1506	171
1506	210
1506	226
1506	234
1506	317
1506	390
1506	451
2518	27
2518	217
1597	164
1597	166
2732	11
2732	13
2732	15
2732	17
2732	18
2732	19
2732	20
2732	24
2732	29
2732	34
2732	38
2732	39
2732	42
2732	44
2732	45
2732	47
2732	52
2732	53
2732	54
2732	57
2732	63
2732	65
2732	67
2732	68
2732	69
2732	72
2732	74
2732	76
2732	79
2732	81
2732	82
2732	85
2732	91
2732	93
2732	94
2732	96
2732	97
2732	101
2732	103
2732	108
2732	112
2732	116
2732	119
2732	120
2732	122
2732	125
2732	130
2732	136
2732	141
2732	153
2732	157
2732	158
2732	162
2732	164
2732	166
2732	171
2732	210
2732	218
2732	226
2732	231
2732	239
2732	240
2732	299
2732	317
2732	394
2732	417
2732	429
2732	435
2732	438
2732	457
2732	465
2732	514
2732	527
2732	535
2732	537
2732	538
2732	540
2732	542
2732	545
154	23
154	24
2469	69
2469	82
2469	164
2469	166
1400	20
1400	22
1400	24
1400	29
2077	112
2077	390
1966	53
1966	81
1966	97
1966	119
1966	162
1966	239
1234	106
1234	191
1083	100
1083	112
1083	155
1939	37
1939	47
1939	48
1939	52
1939	58
1939	69
1939	93
1939	100
1939	108
1939	151
1939	155
1939	161
1939	164
1939	166
1939	202
1939	204
1939	225
1939	265
1939	275
1939	386
125	20
125	31
125	34
125	47
125	57
125	100
125	112
125	155
125	161
125	226
1214	25
1214	35
1214	38
1214	179
1214	187
1935	210
1394	1
1394	3
1394	5
1394	6
1394	8
1394	10
1394	11
1394	15
1394	20
1394	27
1394	34
1394	40
1394	44
1394	45
1394	46
1394	52
1394	55
1394	65
1394	69
1394	71
1394	72
1394	79
1394	80
1394	81
1394	84
1394	93
1394	95
1394	98
1394	100
1394	103
1394	108
1394	110
1394	112
1394	116
1394	119
1394	120
1394	122
1394	125
1394	130
1394	132
1394	153
1394	157
1394	158
1394	163
1394	173
1394	179
1394	183
1394	185
1394	186
1394	199
1394	236
1394	263
1394	265
1394	275
1394	277
1394	313
1394	328
1394	423
1394	441
1394	442
1394	493
1394	494
101	139
1512	58
1512	112
1512	130
1512	142
1512	153
2295	321
1999	20
1999	231
2788	54
1766	71
1766	106
1766	166
1766	265
1766	320
1766	324
1766	447
1766	479
159	144
159	242
1690	11
1690	12
1690	13
1690	15
1690	17
1690	18
1690	19
1690	20
1690	29
1690	34
1690	38
1690	57
1690	69
1690	71
1690	78
1690	108
1690	116
1690	122
1690	130
1690	132
1690	142
1690	202
1690	220
1690	224
1690	231
1690	255
1690	274
1690	348
1690	401
1690	410
1690	425
433	94
409	20
1680	5
1680	39
1680	90
1680	115
1680	160
1680	162
1680	179
1680	262
1680	548
623	11
623	20
623	22
623	29
623	38
623	39
623	40
623	50
623	59
623	65
623	72
623	85
623	101
623	102
623	111
623	117
623	139
623	160
623	179
623	204
623	219
623	242
623	254
623	257
623	265
623	270
623	275
623	277
623	329
623	355
623	361
623	398
623	401
192	87
192	108
192	139
192	142
192	157
192	162
192	164
770	20
770	69
1979	3
1979	63
1979	139
1979	210
1979	212
1979	213
1979	223
329	139
329	265
1067	20
1067	54
1067	134
1067	158
1067	313
1149	25
1149	31
1149	46
1149	58
8	20
8	69
1027	85
1027	111
1027	409
253	54
253	139
1377	280
1377	283
1377	284
1377	285
1377	286
1377	288
1377	291
1377	300
1377	303
1377	307
1377	309
715	20
715	59
715	69
715	94
715	130
715	215
715	336
1728	1
1728	3
1728	5
1728	6
1728	8
1728	10
1728	13
1728	15
1728	17
1728	18
1728	19
1728	20
1728	21
1728	22
1728	24
1728	25
1728	26
1728	27
1728	29
1728	31
1728	32
1728	34
1728	35
1728	37
1728	39
1728	40
1728	42
1728	43
1728	45
1728	46
1728	47
1728	48
1728	50
1728	52
1728	53
1728	54
1728	55
1728	56
1728	57
1728	60
1728	61
1728	62
1728	65
1728	69
1728	71
1728	72
1728	74
1728	76
1728	78
1728	79
1728	81
1728	82
1728	85
1728	89
1728	91
1728	92
1728	93
1728	94
1728	95
1728	96
1728	97
1728	98
1728	100
1728	103
1728	104
1728	107
1728	108
1728	109
1728	111
1728	112
1728	114
1728	115
1728	116
1728	117
1728	120
1728	122
1728	125
1728	129
1728	130
1728	132
1728	134
1728	136
1728	137
1728	138
1728	139
1728	142
1728	148
1728	155
1728	157
1728	158
1728	161
1728	162
1728	164
1728	166
1728	169
1728	174
1728	180
1728	181
1728	199
1728	200
1728	204
1728	209
1728	215
1728	218
1728	223
1728	225
1728	226
1728	236
1728	257
1728	265
1728	272
1728	276
1728	307
1728	313
1728	320
1728	332
1728	347
1728	384
1728	386
1728	391
1728	412
1728	450
1728	477
1728	501
47	139
47	158
1118	20
1118	27
1118	94
1118	153
1118	225
672	31
672	47
136	73
1141	1
1141	3
1141	5
1141	6
1141	8
1141	10
1141	20
1141	29
1141	42
1141	44
1141	45
1141	48
1141	58
1141	60
1141	61
1141	74
1141	76
1141	78
1141	80
1141	81
1141	82
1141	97
1141	98
1141	100
1141	103
1141	107
1141	108
1141	119
1141	120
1141	126
1141	128
1141	130
1141	148
1141	151
1141	152
1141	157
1141	158
1141	161
1141	162
1141	173
1141	202
1141	236
1141	239
1141	265
1141	275
1141	379
1141	388
1141	501
1156	5
1156	20
1156	32
1156	38
1156	47
1156	65
1156	79
1156	82
1156	84
1156	85
1156	94
1156	95
1156	111
1156	120
1156	124
1156	125
1156	139
1156	151
1156	160
1156	180
1156	199
1156	224
1156	265
1156	275
1156	357
1156	433
1585	57
1585	156
1585	210
1585	314
1585	402
1585	419
1585	420
1585	502
2471	34
2653	20
2653	31
2653	32
2653	47
2653	61
2653	62
2653	100
2653	104
2653	112
2653	161
2653	174
643	13
643	15
643	17
643	18
643	19
643	38
643	65
643	119
643	163
643	193
643	194
643	197
643	206
643	239
643	263
121	158
121	483
1281	137
275	12
275	18
275	21
275	26
275	30
275	31
275	32
275	47
275	57
275	61
275	64
275	65
275	81
275	100
275	104
275	134
275	161
275	164
275	166
275	169
275	198
275	217
275	225
275	226
275	243
275	447
1014	158
725	1
725	3
725	5
725	6
725	10
725	11
725	12
725	13
725	15
725	17
725	18
725	19
725	20
725	21
725	22
725	24
725	25
725	26
725	27
725	29
725	31
725	32
725	34
725	38
725	39
725	42
725	45
725	46
725	47
725	48
725	52
725	54
725	55
725	57
725	59
725	60
725	62
725	63
725	64
725	65
725	67
725	68
725	69
725	71
725	72
725	74
725	76
725	77
725	78
725	79
725	80
725	81
725	82
725	87
725	88
725	91
725	92
725	93
725	94
725	95
725	96
725	97
725	98
725	100
725	102
725	104
725	106
725	107
725	108
725	109
725	111
725	112
725	114
725	115
725	117
725	119
725	122
725	125
725	126
725	128
725	129
725	130
725	132
725	134
725	141
725	151
725	152
725	153
725	155
725	156
725	157
725	158
725	160
725	161
725	162
725	163
725	164
725	166
725	168
725	169
725	171
725	180
725	181
725	183
725	185
725	186
725	187
725	188
725	197
725	198
725	206
725	207
725	210
725	212
725	215
725	217
725	218
725	219
725	221
725	223
725	224
725	225
725	226
725	228
725	233
725	235
725	236
725	237
725	239
725	241
725	246
725	247
725	249
725	257
725	259
725	265
725	266
725	268
725	275
725	276
725	281
725	283
725	285
725	286
725	291
725	293
725	295
725	300
725	304
725	307
725	311
725	313
725	319
725	320
725	321
725	325
725	352
725	367
725	379
725	384
725	387
725	391
725	399
725	401
725	403
725	418
725	419
725	420
725	422
725	434
725	436
725	437
725	438
725	449
725	452
725	475
725	482
725	488
725	499
725	500
725	501
725	502
725	506
725	510
725	513
725	523
725	524
725	528
725	529
725	530
725	547
948	26
948	100
948	104
948	112
948	153
570	20
570	26
570	104
570	119
570	153
1002	20
1002	102
1002	103
1002	104
2584	18
2584	32
2584	34
2584	45
2584	68
2584	74
2584	82
2584	84
2584	91
2584	96
2584	100
2584	107
2584	112
2584	116
2584	117
2584	120
2584	130
2584	132
2584	141
2584	151
2584	164
2584	171
2584	179
2584	218
2584	223
2584	233
2584	257
2584	260
2584	281
2584	313
2584	318
2584	336
2584	412
2584	437
2755	13
2755	15
2755	17
2755	19
2755	20
2755	22
2755	24
2755	29
2755	125
2755	134
2668	8
2668	20
2668	21
2668	25
2668	34
2668	38
2668	45
2668	55
2668	59
2668	62
2668	65
2668	68
2668	71
2668	76
2668	78
2668	91
2668	93
2668	94
2668	97
2668	100
2668	106
2668	108
2668	110
2668	116
2668	119
2668	124
2668	129
2668	130
2668	134
2668	136
2668	139
2668	144
2668	157
2668	158
2668	162
2668	164
2668	183
2668	191
2668	193
2668	199
2668	210
2668	214
2668	217
2668	226
2668	265
2668	418
2668	521
2212	1
2212	3
2212	5
2212	6
2212	8
2212	10
2212	11
2212	12
2212	52
2212	98
2212	101
2104	3
2104	5
2104	6
2104	8
2104	10
2104	11
2104	12
2104	13
2104	15
2104	19
2104	20
2104	22
2104	24
2104	25
2104	26
2104	29
2104	34
2104	38
2104	44
2104	48
2104	50
2104	52
2104	55
2104	61
2104	79
2104	82
2104	87
2104	93
2104	95
2104	101
2104	106
2104	107
2104	125
2104	129
2104	134
2104	139
2104	142
2104	199
2104	235
2104	246
2104	265
2104	438
1982	20
1982	158
1431	3
1431	12
1431	19
1431	20
1431	22
1431	24
1431	29
1431	30
1431	31
1431	32
1431	47
1431	54
1431	57
1431	61
1431	62
1431	69
1431	74
1431	78
1431	96
1431	100
1431	101
1431	104
1431	106
1431	120
1431	122
1431	125
1431	134
1431	141
1431	158
1431	161
1431	171
1431	188
1431	194
1431	212
1431	231
1431	238
1431	240
1431	242
1431	263
1431	391
1431	461
1806	1
1806	3
1806	5
1806	6
1806	8
1806	10
1806	13
1806	15
1806	17
1806	18
1806	19
1806	20
1806	21
1806	31
1806	32
1806	34
1806	39
1806	42
1806	44
1806	47
1806	48
1806	50
1806	52
1806	54
1806	57
1806	60
1806	62
1806	65
1806	69
1806	71
1806	74
1806	76
1806	79
1806	80
1806	81
1806	82
1806	84
1806	87
1806	88
1806	89
1806	90
1806	91
1806	92
1806	93
1806	94
1806	97
1806	98
1806	100
1806	101
1806	102
1806	103
1806	104
1806	106
1806	107
1806	108
1806	112
1806	115
1806	116
1806	119
1806	120
1806	122
1806	125
1806	128
1806	129
1806	130
1806	132
1806	139
1806	141
1806	148
1806	151
1806	152
1806	153
1806	157
1806	158
1806	160
1806	162
1806	163
1806	164
1806	166
1806	171
1806	174
1806	176
1806	177
1806	180
1806	181
1806	183
1806	185
1806	186
1806	187
1806	199
1806	202
1806	206
1806	209
1806	210
1806	212
1806	217
1806	218
1806	224
1806	232
1806	236
1806	237
1806	239
1806	247
1806	259
1806	265
1806	288
1806	299
1806	315
1806	320
1806	321
1806	322
1806	323
1806	324
1806	325
1806	326
1806	327
1806	352
1806	355
1806	358
1806	376
1806	379
1806	395
1806	397
1806	416
1806	453
1806	485
1806	495
1806	497
1806	498
608	13
608	20
608	45
608	47
608	67
608	69
608	82
608	93
608	94
608	112
608	122
608	125
608	126
608	134
608	136
608	139
608	158
608	170
608	171
608	212
608	226
608	232
608	265
1681	34
2387	12
2387	20
2387	108
2387	115
2387	122
2387	125
2387	128
2387	132
2387	149
2387	253
2387	285
2387	338
2387	356
2387	377
2387	385
2387	414
2387	417
2387	432
2387	462
2387	500
2387	505
1340	96
563	60
563	109
563	126
563	219
563	255
563	324
563	432
1430	5
1430	11
1430	15
1430	21
1430	25
1430	31
1430	46
1430	50
1430	54
1430	55
1430	71
1430	72
1430	93
1430	97
1430	100
1430	102
1430	106
1430	111
1430	119
1430	132
1430	139
1430	142
1430	157
1430	160
1430	162
1430	164
1430	166
1430	194
1430	197
1430	223
1430	236
1430	315
1430	351
1430	365
1430	401
1091	53
1091	106
625	12
903	1
903	3
903	5
903	6
903	8
903	10
903	11
903	12
903	13
903	15
903	17
903	18
903	19
903	20
903	21
903	24
903	31
903	32
903	34
903	35
903	38
903	46
903	47
903	50
903	52
903	53
903	61
903	68
903	69
903	81
903	91
903	93
903	95
903	97
903	98
903	100
903	102
903	108
903	109
903	111
903	115
903	117
903	119
903	120
903	122
903	125
903	126
903	129
903	130
903	132
903	134
903	136
903	139
903	157
903	158
903	160
903	171
903	180
903	181
903	183
903	209
903	226
903	234
903	240
903	257
903	268
903	279
903	297
903	316
903	321
903	335
903	352
903	373
903	377
903	384
903	385
903	475
1434	106
720	82
720	107
1108	227
1911	11
1911	12
1911	13
1911	21
1911	31
1911	42
1911	47
1911	98
1911	103
1911	109
1911	139
1911	215
1911	263
1911	265
1911	345
2085	1
2085	3
2085	5
2085	6
2085	8
2085	10
2085	12
2085	15
2085	17
2085	18
2085	21
2085	25
2085	31
2085	32
2085	34
2085	39
2085	42
2085	44
2085	45
2085	46
2085	47
2085	53
2085	57
2085	61
2085	62
2085	68
2085	69
2085	74
2085	76
2085	77
2085	87
2085	88
2085	92
2085	95
2085	97
2085	98
2085	100
2085	104
2085	108
2085	109
2085	112
2085	116
2085	117
2085	119
2085	125
2085	126
2085	128
2085	129
2085	130
2085	132
2085	134
2085	136
2085	152
2085	156
2085	157
2085	160
2085	162
2085	164
2085	170
2085	171
2085	174
2085	183
2085	186
2085	191
2085	199
2085	206
2085	217
2085	218
2085	223
2085	225
2085	237
2085	243
2085	257
2085	259
2085	265
2085	275
2085	277
2085	311
2085	316
2085	327
2085	336
2085	379
2085	384
2085	394
2085	402
2085	478
2352	85
2352	139
650	13
650	15
650	18
650	39
650	63
650	73
650	74
650	76
650	117
650	125
650	132
650	160
650	161
650	202
650	236
650	277
650	328
650	345
650	391
650	412
650	429
650	511
650	514
650	525
650	527
650	537
650	538
650	540
650	542
650	545
1406	13
1406	15
1406	17
1406	18
1406	19
1406	38
1406	108
1406	275
1404	234
1669	12
1669	20
1669	24
1669	34
1669	39
1669	69
1669	79
1669	81
1669	100
1669	108
1669	112
1669	124
1669	125
1669	155
1669	158
1669	160
1669	199
1669	202
1669	230
1669	232
1669	237
1669	257
1669	258
1669	438
1649	11
1649	20
1649	53
1649	88
1649	102
1649	119
1649	157
657	1
657	10
657	13
657	15
657	18
657	19
657	20
657	25
657	31
657	34
657	38
657	48
657	50
657	61
657	65
657	74
657	87
657	122
657	134
657	151
657	160
657	164
657	166
657	174
657	237
657	276
657	379
1040	139
602	1
602	3
602	5
602	6
602	8
602	10
602	30
602	60
602	93
602	98
602	126
602	134
602	139
602	158
602	219
602	255
602	265
1724	112
1142	20
1142	155
1142	317
1147	1
1147	3
1147	5
1147	6
1147	8
1147	10
1147	13
1147	19
1147	21
1147	22
1147	44
1147	45
1147	57
1147	67
1147	68
1147	79
1147	95
1147	97
1147	98
1147	100
1147	102
1147	108
1147	114
1147	119
1147	120
1147	122
1147	125
1147	132
1147	134
1147	142
1147	151
1147	152
1147	157
1147	161
1147	162
1147	166
1147	170
1147	180
1147	181
1147	199
1147	218
1147	231
1147	234
1147	239
1147	255
1147	266
1147	280
1147	284
1147	286
1147	291
1147	295
1147	303
1147	307
1147	318
1147	324
1147	347
1147	402
1147	438
1147	445
1354	472
2507	13
2507	87
2507	347
2366	20
2366	31
2366	72
2366	95
2366	124
2366	139
2366	158
2366	163
2366	173
2366	212
2366	234
2366	245
2366	246
2366	257
2366	313
2366	354
2366	355
2366	393
2366	411
2366	439
2366	522
2366	536
193	97
193	139
193	158
193	162
193	219
193	239
556	18
556	19
443	1
443	12
443	13
443	19
443	20
443	25
443	27
443	34
443	38
443	39
[truncated: 2,042 more rows]

## Sheet: positive_miRcancer
disease id	miRNA id
463	142
1003	158
2323	2
2323	5
2323	11
2323	12
2323	15
2323	19
2323	20
2323	22
2323	25
2323	26
2323	27
2323	32
2323	34
2323	42
2323	45
2323	46
2323	47
2323	49
2323	61
2323	62
2323	65
2323	69
2323	71
2323	72
2323	73
2323	74
2323	76
2323	77
2323	78
2323	79
2323	80
2323	81
2323	85
2323	91
2323	93
2323	94
2323	95
2323	96
2323	97
2323	101
2323	102
2323	104
2323	107
2323	108
2323	109
2323	112
2323	119
2323	122
2323	125
2323	128
2323	139
2323	144
2323	149
2323	153
2323	158
2323	163
2323	164
2323	166
2323	173
2323	174
2323	209
2323	214
2323	220
2323	226
2323	240
2323	276
2323	277
2323	317
2323	421
2323	432
2323	447
2323	454
2324	52
2324	153
870	11
870	12
870	47
870	71
870	72
870	95
870	101
870	108
870	116
870	153
870	158
870	164
870	166
870	234
2593	1
2593	3
2593	13
2593	15
2593	17
2593	18
2593	19
2593	20
2593	21
2593	22
2593	24
2593	25
2593	26
2593	29
2593	31
2593	34
2593	38
2593	43
2593	45
2593	46
2593	48
2593	50
2593	52
2593	53
2593	54
2593	55
2593	57
2593	60
2593	65
2593	68
2593	69
2593	71
2593	72
2593	73
2593	74
2593	76
2593	80
2593	81
2593	82
2593	85
2593	86
2593	87
2593	91
2593	93
2593	94
2593	95
2593	96
2593	97
2593	98
2593	100
2593	102
2593	103
2593	104
2593	106
2593	107
2593	108
2593	111
2593	115
2593	119
2593	122
2593	124
2593	125
2593	129
2593	130
2593	132
2593	134
2593	136
2593	139
2593	141
2593	142
2593	147
2593	152
2593	153
2593	155
2593	157
2593	158
2593	160
2593	161
2593	162
2593	164
2593	166
2593	169
2593	172
2593	179
2593	191
2593	198
2593	199
2593	202
2593	210
2593	218
2593	219
2593	220
2593	225
2593	226
2593	231
2593	237
2593	239
2593	240
2593	243
2593	272
2593	276
2593	317
2593	330
2593	348
2593	364
2593	377
2593	379
2593	397
2593	401
2593	411
2593	426
2593	437
2593	454
2593	463
2593	480
2593	494
2593	497
2732	12
2732	13
2732	15
2732	17
2732	24
2732	26
2732	27
2732	42
2732	44
2732	46
2732	48
2732	53
2732	68
2732	69
2732	74
2732	76
2732	79
2732	81
2732	82
2732	87
2732	91
2732	93
2732	94
2732	95
2732	97
2732	100
2732	102
2732	107
2732	108
2732	112
2732	114
2732	115
2732	119
2732	122
2732	124
2732	125
2732	130
2732	134
2732	147
2732	148
2732	153
2732	157
2732	158
2732	161
2732	162
2732	191
2732	226
2732	237
2732	239
2732	268
2732	392
2732	460
2732	469
1182	246
1394	20
433	29
1680	55
1728	1
1728	3
1728	5
1728	6
1728	8
1728	10
1728	11
1728	12
1728	13
1728	15
1728	17
1728	18
1728	19
1728	20
1728	21
1728	24
1728	26
1728	27
1728	37
1728	38
1728	43
1728	46
1728	53
1728	55
1728	56
1728	62
1728	65
1728	68
1728	69
1728	74
1728	79
1728	81
1728	82
1728	90
1728	91
1728	95
1728	97
1728	98
1728	99
1728	100
1728	101
1728	114
1728	115
1728	116
1728	119
1728	124
1728	125
1728	128
1728	139
1728	142
1728	151
1728	152
1728	153
1728	155
1728	157
1728	158
1728	161
1728	162
1728	164
1728	166
1728	170
1728	180
1728	218
1728	226
1728	239
1728	240
1728	331
1728	343
1728	368
1728	372
1728	385
1728	402
1728	410
1728	457
1728	499
1728	532
1728	539
1728	549
1728	550
1728	551
1141	20
1141	25
1141	39
1141	46
1141	50
1141	61
1141	69
1141	74
1141	81
1141	94
1141	95
1141	97
1141	110
1141	122
1141	125
1141	126
1141	137
1141	157
1141	158
1141	166
1141	169
1141	173
1141	234
1141	240
1141	446
1141	449
904	22
904	93
904	148
725	1
725	3
725	5
725	6
725	8
725	10
725	11
725	12
725	13
725	15
725	17
725	18
725	19
725	20
725	21
725	22
725	24
725	26
725	27
725	29
725	31
725	32
725	34
725	38
725	42
725	43
725	44
725	45
725	47
725	52
725	54
725	55
725	59
725	60
725	64
725	65
725	67
725	68
725	69
725	71
725	72
725	74
725	76
725	79
725	80
725	81
725	84
725	90
725	91
725	93
725	94
725	96
725	97
725	98
725	99
725	100
725	106
725	107
725	108
725	110
725	111
725	112
725	114
725	117
725	119
725	120
725	122
725	125
725	126
725	128
725	129
725	132
725	134
725	136
725	139
725	141
725	142
725	147
725	151
725	153
725	155
725	157
725	158
725	161
725	162
725	164
725	166
725	197
725	198
725	202
725	203
725	204
725	206
725	224
725	225
725	233
725	235
725	236
725	237
725	239
725	245
725	246
725	265
725	272
725	274
725	275
725	276
725	287
725	295
725	299
725	300
725	316
725	317
725	325
725	386
725	391
725	430
725	435
725	437
725	445
725	450
725	457
725	464
725	488
2584	11
2584	12
2584	20
2584	29
2584	54
2584	69
2584	79
2584	81
2584	93
2584	115
2584	146
2584	158
2584	199
2668	81
2668	124
2668	134
2668	160
2668	329
1774	134
2104	11
2104	13
2104	15
2104	20
2104	29
2104	38
2104	42
2104	44
2104	46
2104	54
2104	60
2104	67
2104	68
2104	69
2104	71
2104	79
2104	85
2104	87
2104	89
2104	93
2104	94
2104	101
2104	107
2104	111
2104	125
2104	129
2104	139
2104	142
2104	143
2104	164
2104	166
2104	199
2104	219
2104	234
2104	385
2104	461
2104	484
1806	3
1806	13
1806	15
1806	19
1806	20
1806	26
1806	34
1806	37
1806	43
1806	46
1806	65
1806	69
1806	74
1806	79
1806	80
1806	81
1806	82
1806	84
1806	87
1806	91
1806	93
1806	94
1806	97
1806	101
1806	108
1806	114
1806	119
1806	122
1806	130
1806	134
1806	139
1806	146
1806	155
1806	157
1806	158
1806	162
1806	166
1806	180
1806	188
1806	200
1806	236
1806	239
1806	265
1806	275
1806	391
2387	69
2387	157
2387	158
903	1
903	3
903	5
903	6
903	8
903	10
903	15
903	20
903	21
903	25
903	34
903	39
903	43
903	45
903	46
903	53
903	69
903	71
903	87
903	88
903	98
903	99
903	122
903	125
903	134
903	156
903	157
903	158
903	163
903	166
903	180
903	197
903	204
903	234
903	239
903	254
903	316
903	317
903	328
903	433
903	475
902	382
2085	19
2085	20
2085	25
2085	29
2085	42
2085	43
2085	45
2085	50
2085	57
2085	60
2085	69
2085	72
2085	74
2085	82
2085	85
2085	87
2085	93
2085	96
2085	97
2085	102
2085	107
2085	108
2085	112
2085	115
2085	116
2085	119
2085	125
2085	126
2085	128
2085	130
2085	134
2085	157
2085	158
2085	162
2085	164
2085	166
2085	202
2085	219
2085	225
2085	229
2085	234
2085	239
2085	240
2085	270
2085	272
2085	276
2085	279
2085	300
2085	399
2085	403
2085	405
2085	461
650	79
1669	22
1666	12
1666	20
1666	22
1666	29
1666	81
1666	160
1649	20
1649	57
1649	76
1649	79
1649	81
1649	82
1649	95
1649	100
1649	125
1649	276
1140	164
1668	20
1668	24
1668	39
1668	46
1668	79
1668	81
1668	130
1668	155
1668	191
1668	199
1352	15
1352	20
1352	25
1352	34
1352	45
1352	46
1352	47
1352	50
1352	54
1352	59
1352	60
1352	65
1352	68
1352	69
1352	72
1352	82
1352	85
1352	92
1352	94
1352	95
1352	98
1352	107
1352	108
1352	109
1352	115
1352	122
1352	125
1352	126
1352	128
1352	132
1352	136
1352	138
1352	141
1352	153
1352	156
1352	173
1352	200
1352	207
1352	209
1352	212
1352	215
1352	218
1352	220
1352	231
1352	240
1352	265
1352	317
1352	336
1352	349
1352	381
1352	401
1352	425
1352	445
1352	504
604	25
604	72
604	97
604	107
604	225
521	107
521	115
790	57
790	87
790	125
790	275
2446	79
848	34
848	60
848	69
848	94
848	100
848	367
2078	1
2078	11
2078	12
2078	13
2078	15
2078	17
2078	18
2078	19
2078	20
2078	22
2078	24
2078	26
2078	27
2078	29
2078	35
2078	38
2078	39
2078	45
2078	46
2078	47
2078	69
2078	71
2078	72
2078	73
2078	76
2078	80
2078	82
2078	85
2078	87
2078	90
2078	91
2078	93
2078	100
2078	106
2078	107
2078	108
2078	109
2078	111
2078	112
2078	115
2078	119
2078	122
2078	124
2078	125
2078	128
2078	129
2078	130
2078	134
2078	136
2078	152
2078	153
2078	156
2078	164
2078	166
2078	188
2078	198
2078	199
2078	205
2078	207
2078	217
2078	225
2078	226
2078	234
2078	239
2078	240
2078	246
2078	266
2078	276
2078	300
2078	317
2078	329
2078	386
2078	395
2078	430
2078	435
2078	504
2078	533
847	1
847	32
847	45
847	57
847	71
847	94
847	125
847	138
847	200
847	225
727	13
727	15
727	17
727	18
727	19
727	24
727	38
1812	162
1812	225
1715	20
1715	21
1715	29
1715	93
1715	106
1715	125
1715	219
1715	243
851	69
851	78
851	91
1306	22
1306	29
1306	72
1306	74
1306	130
1306	162
1306	183
1306	197
1306	240
814	31
814	50
814	60
814	81
814	87
814	91
814	107
814	199
1187	1
1187	3
1187	5
1187	6
1187	8
1187	10
1187	12
1187	13
1187	15
1187	17
1187	18
1187	19
1187	20
1187	21
1187	25
1187	29
1187	34
1187	38
1187	39
1187	43
1187	44
1187	45
1187	46
1187	47
1187	53
1187	58
1187	69
1187	76
1187	79
1187	82
1187	87
1187	91
1187	95
1187	96
1187	97
1187	98
1187	99
1187	100
1187	112
1187	116
1187	122
1187	125
1187	130
1187	134
1187	142
1187	147
1187	153
1187	161
1187	173
1187	183
1187	197
1187	199
1187	207
1187	209
1187	226
1187	272
1187	292
1187	405
1187	456
1187	459
1187	475
1729	79
1735	91
1735	112
2012	1
2012	5
2012	11
2012	12
2012	13
2012	15
2012	17
2012	20
2012	21
2012	24
2012	25
2012	27
2012	29
2012	31
2012	32
2012	34
2012	35
2012	39
2012	40
2012	42
2012	44
2012	45
2012	46
2012	47
2012	50
2012	52
2012	54
2012	57
2012	59
2012	60
2012	61
2012	62
2012	63
2012	65
2012	67
2012	68
2012	69
2012	71
2012	72
2012	73
2012	79
2012	80
2012	81
2012	84
2012	85
2012	93
2012	94
2012	96
2012	100
2012	103
2012	104
2012	107
2012	112
2012	115
2012	116
2012	117
2012	119
2012	122
2012	125
2012	126
2012	128
2012	130
2012	133
2012	134
2012	138
2012	139
2012	141
2012	142
2012	144
2012	146
2012	148
2012	151
2012	153
2012	155
2012	157
2012	158
2012	161
2012	162
2012	164
2012	180
2012	191
2012	197
2012	199
2012	207
2012	209
2012	210
2012	212
2012	219
2012	223
2012	224
2012	225
2012	239
2012	240
2012	246
2012	251
2012	265
2012	272
2012	275
2012	276
2012	277
2012	279
2012	286
2012	287
2012	317
2012	336
2012	380
2012	385
2012	431
2012	433
2012	470
2012	483
2012	544
1726	12
1726	34
1726	44
1726	47
1726	97
1726	119
1726	125
1726	142
1726	157
1726	158
1726	162
1726	204
1726	239
1726	246
1726	264
1726	477
1278	55
1278	76
1278	78
1278	93
1278	229
1278	265
2669	93
2669	94
2669	116
2669	265
2669	526
2122	8
2122	12
2122	20
2122	26
2122	46
2122	69
2122	71
2122	72
2122	73
2122	74
2122	76
2122	92
2122	93
2122	94
2122	116
2122	134
2122	139
2122	153
2122	158
2122	164
2122	173
2122	224
2122	265
2122	277
2122	371
2675	76
2086	45
2086	46
2086	54
2086	74
2086	164
2086	166
2086	219
2102	20
2102	79
2102	93
2102	169
812	11
812	12
812	13
812	17
812	18
812	19
812	20
812	25
812	34
812	44
812	45
812	46
812	54
812	65
812	67
812	69
812	71
812	72
812	79
812	81
812	87
812	88
812	91
812	96
812	112
812	122
812	125
812	158
812	170
812	194
812	212
812	226
812	234
812	272
812	276
812	330
812	457
812	483
2410	1
2410	6
2410	12
2410	20
2410	29
2410	32
2410	45
2410	51
2410	61
2410	62
2410	65
2410	69
2410	76
2410	79
2410	80
2410	81
2410	82
2410	91
2410	93
2410	100
2410	112
2410	114
2410	116
2410	119
2410	122
2410	125
2410	134
2410	139
2410	151
2410	162
2410	177
2410	194
2410	202
2410	226
2410	239
2410	265
2410	325
2410	345
2410	395
2410	467
2410	473
2410	520
2411	3
2411	5
2411	50
2411	69
2411	80
2411	82
2411	91
2411	106
2411	116
2411	119
2411	155
2411	157
2411	158
2411	201
2411	225
2411	321
2411	385
2105	111
2105	199
2105	449
1186	54
1186	79
1186	95
1186	162
2213	13
2213	19
2213	106
2213	160
2213	268
738	1
738	3
738	5
738	6
738	8
738	10
738	43
738	98
738	99
832	13
832	15
832	18
832	19
832	20
832	26
832	38
832	46
832	69
832	97
832	124
832	157
1298	74
1298	158
1298	225
1298	265
1181	11
1181	20
1181	29
1181	34
1181	46
1181	55
1181	76
1181	79
1181	81
1181	82
1181	87
1181	93
1181	95
1181	104
1181	107
1181	110
1181	119
1181	122
1181	134
1181	162
1181	170
1181	199
1181	231
1181	247
1181	257
1181	425
1873	1
1873	10
1873	12
1873	13
1873	17
1873	18
1873	19
1873	22
1873	24
1873	25
1873	26
1873	27
1873	29
1873	37
1873	39
1873	42
1873	43
1873	50
1873	52
1873	63
1873	65
1873	68
1873	69
1873	71
1873	72
1873	73
1873	74
1873	76
1873	79
1873	80
1873	81
1873	82
1873	87
1873	88
1873	91
1873	92
1873	93
1873	94
1873	96
1873	97
1873	101
1873	102
1873	103
1873	106
1873	107
1873	108
1873	109
1873	111
1873	115
1873	122
1873	125
1873	126
1873	130
1873	138
1873	139
1873	146
1873	147
1873	153
1873	156
1873	158
1873	160
1873	161
1873	162
1873	174
1873	175
1873	194
1873	199
1873	202
1873	206
1873	210
1873	215
1873	225
1873	239
1873	246
1873	247
1873	257
1873	265
1873	272
1873	274
1873	275
1873	276
1873	277
1873	336
1873	341
1873	352
1873	366
1873	377
1873	397
1873	406
1873	433
1734	25
1734	29
1734	116
1734	134
1395	6
1395	12
1395	20
1395	25
1395	28
1395	31
1395	34
1395	39
1395	47
1395	52
1395	54
1395	69
1395	81
1395	91
1395	100
1395	109
1395	112
1395	116
1395	137
1395	141
1395	146
1395	157
1395	160
1395	161
1395	179
1395	194
1395	199
1395	435
1395	437
1612	69
1612	74
1612	115
1612	124
1612	125
1612	130
1612	164
1612	166
1612	425
1436	1
1436	3
1436	5
1436	6
1436	8
1436	10
1436	12
1436	13
1436	15
1436	17
1436	18
1436	19
1436	20
1436	21
1436	22
1436	24
1436	25
1436	26
1436	29
1436	31
1436	32
1436	34
1436	35
1436	37
1436	38
1436	42
1436	43
1436	44
1436	45
1436	46
1436	47
1436	49
1436	52
1436	55
1436	56
1436	57
1436	59
1436	60
1436	62
1436	63
1436	65
1436	68
1436	69
1436	71
1436	72
1436	73
1436	74
1436	76
1436	78
1436	79
1436	81
1436	82
1436	84
1436	85
1436	87
1436	88
1436	89
1436	90
1436	91
1436	92
1436	93
1436	94
1436	95
1436	96
1436	97
1436	98
1436	100
1436	101
1436	106
1436	107
1436	108
1436	110
1436	112
1436	115
1436	116
1436	119
1436	122
1436	124
1436	125
1436	128
1436	129
1436	130
1436	134
1436	136
1436	137
1436	139
1436	142
1436	146
1436	147
1436	149
1436	152
1436	153
1436	155
1436	157
1436	158
1436	160
1436	161
1436	162
1436	164
1436	169
1436	170
1436	173
1436	180
1436	183
1436	185
1436	191
1436	194
1436	197
1436	199
1436	200
1436	201
1436	219
1436	223
1436	224
1436	225
1436	227
1436	232
1436	233
1436	234
1436	237
1436	238
1436	239
1436	241
1436	243
1436	246
1436	247
1436	253
1436	266
1436	272
1436	274
1436	275
1436	276
1436	277
1436	286
1436	291
1436	300
1436	303
1436	314
1436	315
1436	316
1436	317
1436	321
1436	346
1436	368
1436	370
1436	379
1436	385
1436	390
1436	397
1436	407
1436	423
1436	425
1436	438
1436	440
1436	444
1436	454
1436	455
1436	469
1436	491
1436	495
1436	512
1436	541
1435	267
2440	20
2440	46
2440	69
2440	72
2440	76
2440	80
1977	1
1977	3
1977	5
1977	6
1977	8
1977	10
1977	11
1977	12
1977	15
1977	17
1977	22
1977	31
1977	38
1977	43
1977	69
1977	73
1977	98
1977	99
1977	101
1977	107
1977	108
1977	115
1977	125
1977	146
1977	153
1977	162
1977	213
1977	223
1977	225
1977	240
1977	411
1878	31
1878	47
1528	79
873	12
873	26
873	34
873	42
873	67
873	116
873	139
873	142
873	158
873	174
873	215
873	217
873	234
873	340
873	508
2681	97
2681	101
436	5
436	13
436	19
436	26
436	31
436	35
436	61
436	71
436	95
436	108
436	109
436	133
436	158
436	191
436	202
436	210
436	220
1318	54
1318	91
1318	93
1318	94
909	1
909	11
909	12
909	13
909	15
909	17
909	18
909	19
909	20
909	21
909	22
909	24
909	25
909	27
909	29
909	31
909	32
909	34
909	38
909	39
909	40
909	42
909	45
909	46
909	48
909	50
909	54
909	56
909	59
909	60
909	63
909	65
909	68
909	69
909	71
909	74
909	76
909	79
909	82
909	84
909	88
909	91
909	93
909	95
909	96
909	97
909	100
909	101
909	107
909	108
909	112
909	114
909	115
909	119
909	122
909	125
909	129
909	134
909	141
909	142
909	143
909	152
909	153
909	155
909	156
909	157
909	158
909	160
909	162
909	169
909	194
909	199
909	202
909	210
909	212
909	215
909	218
909	219
909	223
909	226
909	228
909	232
909	234
909	239
909	246
909	253
909	276
909	313
909	334
909	379
909	391
909	419
909	459
909	465
909	483
909	496
909	543
1949	1
1949	3
1949	5
1949	6
1949	8
1949	10
1949	13
1949	15
1949	19
1949	20
1949	24
1949	39
1949	43
1949	46
1949	60
1949	68
1949	80
1949	87
1949	91
1949	95
1949	98
1949	99
1949	100
1949	107
1949	116
1949	124
1949	125
1949	130
1949	141
1949	156
1949	158
1949	161
1949	166
1949	199
1949	202
1949	223
1949	246
1949	272
1949	321
1949	401
1949	411
1949	450
1910	20
1910	55
1910	87
1910	115
434	3
434	109
