# Supplementary material for: A Novel Model for Predicting Associations between Diseases and LncRNA-miRNA Pairs Based on a Newly Constructed Bipartite Network
Source: Comput Math Methods Med. 2018 May 6;2018:6789089. doi: 10.1155/2018/6789089 (PMC5960578; doi:10.1155/2018/6789089)
Supplement: Supplementary Materials — There are four supplementary tables in this manuscript. And among them, Supplementary Table 1 is a description of the lncRNA-disease associations, in which there are 2048 lncRNA-disease associations included, and the 1st column represents the lncRNAs and the 2nd column represents the diseases. Supplementary Table 2 is a description of the miRNA-disease associations, which contains the ID of diseases, the ID of miRNAs, and the associations between diseases and miRNAs. Supplementary Table 3 is a description of the lncRNA-miRNA associations, which contains 20343 lncRNA-miRNA associations and in which the first column represents the lncRNAs and the second column represents the miRNAs. Supplementary Table 4 is a description of the predictive results of associations between diseases and lncRNA-miRNA pairs while adopting PADLMP to execute prediction. [file 6789089.f1.zip › Supplementary Materials/Supplementary File 4.xlsx]

## Sheet: disease_LMPairs
ID_disease	ID_LMPairs
7	739
7	705
7	686
7	711
7	685
7	772
7	672
7	768
7	753
7	728
7	720
7	738
7	707
7	783
7	682
7	729
7	730
7	736
7	770
7	786
7	788
7	789
7	760
7	777
7	731
7	787
7	732
7	782
7	791
16	654
16	674
16	683
16	661
16	724
16	747
16	753
16	685
16	775
16	646
16	670
16	772
16	656
16	709
16	696
16	723
16	707
16	754
16	765
16	757
16	760
16	777
16	731
16	787
16	677
16	710
16	735
16	751
16	756
16	773
16	774
16	776
16	780
16	781
16	785
16	790
16	732
16	782
16	791
7	260
7	242
7	250
7	247
7	246
7	265
7	268
7	288
7	269
7	266
7	278
7	451
7	430
7	436
7	442
7	456
7	441
7	450
7	435
7	449
7	464
7	471
7	418
7	447
7	469
7	473
7	505
7	28
7	37
7	33
7	29
7	30
16	429
7	34
7	40
7	32
16	436
7	31
7	36
16	456
16	466
7	39
16	441
7	42
16	287
16	264
16	247
16	281
7	35
16	266
16	278
16	447
16	258
16	267
16	275
16	280
16	285
16	286
16	289
16	433
16	448
16	472
16	469
16	473
16	269
7	87
16	418
7	44
7	43
7	304
7	187
7	189
7	204
7	209
7	801
7	12
7	92
7	576
7	575
7	544
7	545
7	547
7	555
7	524
7	525
7	526
7	527
7	541
7	208
7	197
7	198
7	199
7	200
7	201
7	202
7	207
7	203
7	811
7	806
7	813
7	809
7	68
7	60
7	62
7	75
7	57
7	493
7	121
7	494
7	583
7	590
7	123
7	122
7	125
7	578
7	593
7	592
7	406
7	574
7	41
7	82
7	83
7	90
7	89
7	91
7	546
7	548
7	550
7	542
7	186
7	553
7	556
7	551
7	301
7	810
7	300
7	302
7	803
7	812
7	587
7	804
7	581
7	69
7	70
7	65
7	74
7	58
7	59
7	409
7	589
7	584
7	588
7	195
7	194
7	533
7	538
7	549
7	535
7	532
7	800
7	298
7	802
7	71
7	53
7	72
7	50
7	55
7	56
7	80
7	579
7	84
7	577
7	299
7	805
7	66
7	67
7	540
7	124
7	582
7	585
7	586
16	39
34	699
34	712
34	717
34	631
34	630
34	676
34	714
34	640
34	687
34	679
34	726
34	737
34	759
34	722
34	740
34	778
34	728
34	720
34	658
34	678
34	697
34	727
34	743
34	748
34	749
34	761
34	771
34	779
34	656
34	696
34	723
34	757
34	783
34	682
34	729
34	730
34	736
34	770
34	786
34	788
34	789
34	760
34	777
34	731
34	787
34	677
34	710
34	735
34	751
34	756
34	773
34	774
34	776
34	780
34	781
34	785
34	790
16	17
16	23
16	18
16	25
16	27
16	197
16	198
16	199
16	200
16	201
16	202
16	207
16	203
16	60
16	75
16	87
16	524
16	525
16	526
16	527
16	541
16	292
16	293
16	516
16	503
16	403
16	544
16	801
16	806
16	811
16	813
16	809
16	204
16	209
16	208
16	57
16	58
16	59
16	575
16	576
16	1
16	2
16	6
16	511
16	522
16	12
16	583
16	122
16	123
16	578
16	187
16	189
16	547
16	555
16	406
16	519
16	517
16	504
16	506
16	512
16	498
16	574
16	804
16	68
16	509
16	563
16	520
16	518
16	493
16	121
16	494
16	586
16	590
16	545
16	186
16	587
16	581
16	593
16	523
16	501
16	510
16	550
16	546
16	548
16	533
16	538
16	298
16	805
16	301
16	302
16	810
16	812
16	71
16	195
16	67
16	50
16	56
16	66
16	69
16	70
16	74
16	82
16	83
16	90
16	91
16	3
16	4
16	5
16	9
16	10
16	558
16	584
16	588
16	579
16	549
16	532
16	556
16	551
16	409
16	80
16	592
16	542
16	299
16	300
16	800
16	802
16	803
16	53
16	55
16	62
16	65
16	72
16	84
16	89
16	92
16	194
16	577
16	7
16	8
16	76
16	77
16	190
16	507
16	508
16	513
16	514
16	521
16	560
16	562
16	564
16	124
16	125
16	505
16	582
16	585
16	589
16	535
16	553
16	540
56	721
56	650
56	662
56	698
56	745
56	764
56	631
56	665
56	629
56	701
56	762
56	674
56	661
56	724
56	686
56	679
56	726
56	737
56	759
56	703
56	725
56	734
56	766
56	767
56	775
56	646
56	670
56	672
56	768
56	753
56	658
56	678
56	697
56	727
56	743
56	748
56	749
56	761
56	771
56	779
56	656
56	709
56	723
56	728
56	754
56	765
56	720
56	738
56	707
56	783
56	677
56	710
56	735
56	751
56	756
56	773
56	774
56	776
56	780
56	781
56	785
56	790
56	682
56	729
56	730
56	736
56	770
56	786
56	788
56	789
56	760
56	777
56	731
56	787
56	732
56	782
56	791
62	744
62	663
62	702
62	752
62	681
62	694
62	742
62	739
62	630
62	676
62	714
62	629
62	701
62	762
62	659
62	673
62	706
62	769
62	747
62	679
62	726
62	737
62	722
62	740
62	778
62	703
62	725
62	734
62	766
62	767
62	711
62	775
62	772
62	656
62	696
62	709
62	728
62	658
62	678
62	697
62	727
62	743
62	748
62	749
62	761
62	771
62	779
62	738
62	757
62	754
62	765
62	783
34	414
62	682
62	729
62	730
62	736
62	770
62	786
62	788
62	789
62	760
62	777
62	677
62	710
62	735
62	751
62	756
62	773
62	774
62	776
62	780
62	781
62	785
62	790
62	732
62	782
62	791
34	415
34	443
34	444
34	458
34	465
34	467
34	450
34	452
34	455
34	459
34	468
34	435
34	449
34	464
34	471
34	447
34	433
34	448
34	472
34	418
56	232
56	236
56	276
56	225
56	241
56	256
56	262
56	274
56	287
7	327
56	223
56	255
56	257
56	273
56	277
56	284
56	264
56	242
56	250
56	445
56	258
56	267
56	275
56	280
56	285
56	286
56	289
56	246
56	265
56	268
56	288
56	266
56	278
56	461
56	419
56	415
56	454
56	413
56	429
56	453
56	439
56	460
56	424
56	463
56	430
7	345
7	335
56	458
56	465
56	446
56	466
56	456
56	441
7	215
7	217
56	452
56	455
56	459
56	468
56	450
56	435
56	433
56	448
56	472
56	449
56	464
56	471
56	447
56	469
56	473
56	418
7	143
7	382
7	312
7	358
7	362
7	158
7	391
7	347
62	414
62	434
62	229
62	271
56	540
7	357
7	387
7	394
7	395
7	397
7	398
7	399
7	400
7	375
7	392
7	381
62	444
62	413
62	416
62	236
62	276
62	224
62	243
62	245
62	253
62	263
62	270
62	272
62	283
7	181
7	383
7	389
7	393
7	396
7	363
7	380
7	149
7	359
7	390
7	219
7	183
62	453
62	439
62	460
62	423
62	431
62	462
62	451
34	37
62	223
62	255
62	257
62	273
62	277
62	284
34	28
34	22
62	287
62	281
21	704
62	465
62	467
62	446
62	442
62	246
62	265
62	268
62	288
62	466
62	258
62	267
62	275
62	280
62	285
62	286
62	289
62	269
34	581
34	587
21	733
21	663
34	230
62	450
62	452
62	455
62	459
62	468
62	435
34	29
34	30
34	21
34	23
21	664
21	708
21	784
34	402
21	668
21	690
21	739
34	33
34	34
34	40
62	449
62	464
62	471
34	36
62	433
62	448
62	472
62	469
62	473
62	418
34	507
34	508
34	509
34	511
34	513
34	514
34	18
34	25
34	27
21	665
21	705
21	683
21	640
21	687
21	659
21	673
21	706
21	769
34	254
34	221
34	248
34	31
34	39
56	28
21	685
21	759
21	672
21	768
21	703
21	725
21	734
21	766
21	767
21	722
21	740
21	778
21	711
21	646
21	670
34	279
34	251
34	259
34	220
34	222
34	32
34	239
34	35
21	709
21	696
21	720
21	658
21	678
21	697
21	727
21	743
21	748
21	749
21	761
21	771
21	779
21	738
21	723
21	707
21	754
21	765
21	757
34	240
34	232
34	271
34	229
34	42
34	237
34	282
34	238
34	262
34	253
56	29
16	135
56	37
56	30
21	783
56	26
21	682
21	729
21	730
21	736
21	770
21	786
21	788
21	789
21	731
21	787
21	677
21	710
21	735
21	751
21	756
21	773
21	774
21	776
21	780
21	781
21	785
21	790
21	732
21	782
21	791
34	792
34	249
34	274
34	272
34	243
34	283
34	245
34	44
34	293
16	319
34	247
34	87
56	40
56	17
56	32
34	43
34	256
34	260
34	242
34	223
34	257
34	292
34	519
34	516
34	517
34	574
34	208
34	544
34	60
34	62
34	75
34	278
34	285
34	545
34	593
34	592
34	801
34	806
34	301
34	810
34	300
34	302
34	803
34	812
34	813
34	809
34	83
34	82
34	236
34	276
34	41
34	225
34	241
34	224
34	263
34	270
34	273
34	209
34	204
34	203
34	207
34	197
34	198
34	199
34	200
34	548
34	533
34	542
34	550
34	546
34	69
34	90
34	65
34	74
34	89
34	91
34	576
34	57
34	58
34	59
34	575
34	6
34	1
34	564
34	520
34	189
34	187
34	547
34	553
34	555
34	186
34	556
34	541
34	524
34	525
34	526
34	406
16	166
56	33
56	36
34	800
34	802
34	804
56	21
56	23
34	250
34	255
34	277
34	284
34	287
34	264
34	523
34	281
34	53
34	194
34	70
34	72
34	50
34	55
34	56
34	66
34	68
34	562
34	518
34	5
34	558
34	8
34	9
34	10
34	535
34	551
34	409
34	80
34	298
34	299
34	805
34	811
56	402
34	84
56	18
56	25
56	27
34	246
34	265
34	268
34	288
34	304
34	201
34	202
34	538
34	67
34	71
34	92
34	195
34	266
34	577
34	2
34	3
34	4
34	7
34	76
34	77
34	190
34	258
34	267
34	275
34	280
34	286
34	289
34	521
34	522
34	560
34	563
34	540
34	12
34	269
34	527
34	532
34	549
56	34
56	42
16	177
16	322
16	342
56	31
56	39
56	87
16	326
16	314
56	503
56	1
56	6
56	35
56	204
56	209
56	208
56	197
56	198
56	199
56	201
56	207
56	801
56	583
16	140
16	217
56	292
56	516
56	517
56	519
56	574
56	575
16	356
56	510
56	512
56	501
56	506
56	806
56	811
56	813
56	60
56	57
56	493
56	122
56	578
56	582
56	592
56	593
56	406
16	148
56	41
56	195
56	194
56	91
56	89
56	90
56	43
56	504
56	498
56	403
56	7
56	509
56	520
56	563
56	5
56	800
56	298
56	302
56	812
56	300
56	301
56	803
56	810
56	804
56	71
56	53
56	74
56	82
56	83
56	65
56	69
56	59
56	587
56	121
56	494
56	579
56	584
56	586
56	588
56	293
56	523
62	28
56	558
56	44
56	50
56	70
56	409
16	367
16	382
16	312
56	92
56	576
56	577
62	37
62	33
56	76
56	77
56	2
56	3
56	4
56	8
56	9
56	10
56	190
56	507
56	508
56	511
56	513
56	514
56	518
56	521
56	522
56	560
56	562
56	564
56	304
63	133
56	200
56	202
56	203
56	299
56	802
56	805
56	809
56	55
56	56
56	58
56	62
56	66
56	67
56	68
56	72
56	75
56	84
56	12
56	581
56	123
56	124
56	125
56	505
56	585
56	589
56	590
56	80
16	330
16	361
16	155
16	347
62	29
62	30
16	387
16	394
16	395
16	397
16	398
16	399
16	400
16	392
16	157
16	340
16	366
16	381
16	371
16	375
16	372
16	357
16	182
62	15
62	34
62	36
16	181
16	383
16	149
16	359
16	390
16	386
16	183
16	363
16	380
16	215
16	219
16	152
7	134
62	14
62	402
62	20
62	26
62	35
62	39
62	13
62	40
62	32
62	42
62	17
63	140
7	311
62	24
62	19
62	31
62	292
62	44
62	575
16	211
16	212
16	214
63	317
62	22
62	792
62	544
62	501
62	506
62	512
62	23
62	208
62	203
62	197
62	198
62	199
62	202
62	576
62	518
62	555
62	547
62	524
62	525
62	526
62	583
62	122
62	123
62	124
62	578
62	582
62	592
62	593
19	146
16	216
62	41
62	43
62	542
62	548
62	517
62	519
62	574
62	504
62	498
62	403
62	204
62	800
62	801
62	806
62	805
62	300
62	301
62	302
62	803
62	810
62	812
62	804
62	195
62	194
62	89
62	90
62	91
62	87
62	1
62	549
62	535
62	187
62	556
62	505
62	585
62	587
62	80
62	409
19	325
63	337
62	533
62	546
62	550
62	538
62	21
62	293
62	516
62	523
62	503
62	510
7	152
62	298
62	802
62	82
62	83
62	5
62	532
62	551
62	579
62	584
62	588
62	406
62	540
62	304
62	12
62	200
62	201
62	207
62	209
62	299
62	809
62	811
62	813
62	84
62	92
62	577
62	76
62	77
62	2
62	3
62	4
62	6
62	7
62	8
62	9
62	10
62	18
62	25
62	27
62	190
62	507
62	508
62	509
62	511
62	513
62	514
62	520
62	521
62	522
62	558
62	560
62	562
62	563
62	564
62	186
62	189
62	527
62	541
62	545
62	553
62	121
62	125
62	493
62	494
62	586
62	589
62	590
62	581
19	311
7	211
7	212
7	214
62	162
7	216
21	440
21	427
63	211
63	212
63	214
19	152
63	216
62	128
62	146
14	168
62	137
21	429
21	470
21	453
21	424
21	463
21	430
21	423
21	431
21	462
21	451
21	436
19	211
19	212
19	214
34	163
62	140
21	458
21	446
21	465
21	467
21	442
21	441
34	129
19	216
21	452
21	455
21	459
21	468
21	435
7	653
34	310
14	334
21	449
21	464
21	471
21	447
21	433
21	448
21	472
21	469
21	473
21	418
34	134
56	133
62	337
7	746
56	168
34	334
34	145
34	349
34	144
56	327
34	175
34	354
34	351
56	328
56	146
62	370
56	156
14	145
56	378
62	351
56	325
14	175
14	354
56	177
14	351
14	152
56	334
34	177
56	322
34	308
56	335
56	140
34	342
56	323
62	346
62	350
62	174
62	307
14	156
56	314
62	156
56	326
62	211
62	212
62	214
34	152
34	215
56	215
56	217
14	378
56	379
62	365
56	320
56	360
34	320
34	176
34	147
34	169
34	331
34	153
56	148
62	216
14	177
56	376
56	169
56	331
56	153
56	151
34	379
56	356
34	148
14	179
62	179
14	345
62	342
62	338
34	178
19	309
16	746
21	171
14	211
14	212
14	214
14	150
14	348
62	150
62	141
14	326
34	368
62	215
62	217
56	368
56	374
34	374
21	328
34	384
19	351
34	367
14	216
34	312
14	215
56	312
14	376
14	388
14	360
14	151
62	176
14	321
62	321
62	379
62	320
62	147
62	169
62	331
62	153
62	360
62	151
34	158
34	391
34	330
34	361
14	379
21	310
19	139
34	362
14	148
34	358
34	211
34	212
34	214
56	330
56	361
56	362
56	158
56	391
56	358
34	155
56	347
56	152
34	392
14	329
62	377
62	178
62	143
62	329
56	157
21	28
56	381
56	357
19	346
56	142
56	173
56	385
34	142
34	173
34	385
34	216
56	340
56	366
34	157
34	340
34	366
56	182
34	387
34	394
34	395
34	397
34	398
34	399
34	400
56	371
34	375
34	381
34	357
34	372
34	182
21	137
56	387
56	394
56	395
56	397
56	398
56	399
56	400
56	392
56	375
62	368
62	384
62	312
19	177
56	380
14	382
62	367
62	382
21	33
14	374
14	384
14	367
19	365
34	389
34	393
34	396
14	312
19	172
34	181
34	383
56	386
19	378
56	389
56	393
56	396
34	149
34	359
34	390
34	386
34	363
34	380
34	217
34	219
56	181
56	383
56	149
56	359
56	390
56	183
56	219
21	136
62	358
62	362
62	158
62	391
14	347
21	29
62	330
62	361
62	155
21	30
21	13
21	15
14	362
14	358
19	308
21	34
14	155
19	179
19	338
19	322
21	134
21	401
63	373
21	230
62	142
62	173
62	385
62	375
62	357
62	182
14	371
62	381
62	157
21	40
62	340
62	366
62	392
62	372
62	371
21	221
21	32
21	19
21	37
21	20
19	326
14	142
14	173
14	385
63	98
14	387
14	394
14	395
14	397
14	398
14	399
14	400
14	157
14	340
14	366
14	375
14	381
14	372
14	357
14	182
19	314
19	348
19	150
62	636
62	693
19	141
19	215
19	217
21	311
21	402
62	389
62	393
62	396
14	183
62	181
62	383
21	31
62	386
62	363
62	183
62	380
21	36
62	219
21	248
21	220
21	222
14	389
14	393
14	396
19	148
63	313
14	181
14	383
14	149
14	359
14	390
14	386
14	363
14	380
19	376
14	217
14	219
19	320
19	388
19	147
62	718
19	176
62	657
62	692
56	211
56	212
56	214
21	254
21	279
21	232
21	271
21	237
21	22
21	17
19	178
19	377
56	216
21	337
21	240
7	234
21	282
21	239
21	42
21	225
21	224
21	245
19	382
19	374
19	368
19	384
63	365
63	177
21	251
21	259
21	249
21	262
21	274
21	21
21	223
21	44
21	39
21	23
19	155
19	158
19	391
63	338
63	106
16	114
21	152
63	322
21	229
21	35
21	238
21	792
21	256
21	253
21	272
21	292
21	257
21	544
63	323
21	293
21	801
21	75
21	6
21	1
21	18
21	25
21	27
21	583
21	189
21	187
21	524
21	525
21	526
21	527
21	541
19	142
19	173
19	385
19	182
19	392
19	387
19	394
19	395
19	397
19	398
19	399
19	400
19	157
19	340
19	366
19	371
19	372
19	375
19	357
19	381
63	141
63	314
21	236
21	276
21	241
21	41
21	260
21	243
21	263
21	270
21	283
21	43
21	517
21	519
21	503
21	506
21	510
21	512
21	498
21	574
21	809
21	59
21	87
21	278
21	576
[truncated: 49,878 more rows]

## Sheet: disease
ID_disease	Name_disease
1	heart disease
2	colon cancer
3	kidney cancer
4	endometriosis
5	adenocarcinoma
6	acquired immunodeficiency syndrome
7	hepatocellular carcinoma
8	hepatoblastoma
9	neuroblastoma
10	periodontitis
11	chronic lymphocytic leukemia
12	leukemia
13	neurodegenerative disease
14	lung cancer
15	endometrial cancer
16	breast cancer
17	squamous cell carcinoma
18	thyroid cancer
19	melanoma
20	atherosclerosis
21	ovarian cancer
22	basal cell carcinoma
23	endometrial carcinoma
24	laryngeal squamous cell carcinoma
25	testicular cancer
26	malignant glioma
27	gastrointestinal system cancer
28	osteosarcoma
29	coronary heart disease
30	meningioma
31	liver cancer
32	esophagus squamous cell carcinoma
33	pituitary adenoma
34	non-small cell lung carcinoma
35	lung adenocarcinoma
36	adrenocortical carcinoma
37	papillary thyroid carcinoma
38	bladder carcinoma
39	cervical cancer
40	renal cell carcinoma
41	renal clear cell carcinoma
42	esophageal cancer
43	mixed glioma
44	schizophrenia
45	head and neck squamous cell carcinoma
46	myocardial infarction
47	cerebrovascular disease
48	rheumatoid arthritis
49	chronic myeloid leukemia
50	Hodgkin's lymphoma
51	Burkitt's lymphoma
52	polycythemia vera
53	systemic lupus erythematosus
54	acute myeloid leukemia
55	gastrointestinal stromal tumor
56	colorectal cancer
57	nasopharynx carcinoma
58	diabetes mellitus
59	type 2 diabetes mellitus
60	multiple myeloma
61	acute lymphocytic leukemia
62	prostate cancer
63	stomach cancer
64	pre-eclampsia
65	Alzheimer's disease
66	urinary bladder cancer
67	Huntington's disease
68	lymphoma

## Sheet: lncRNA
ID_lncRNA	Name_lncRNA
1	baiap2-as1
2	casc2
3	ccat1
4	cdkn2b-as1
5	ctb-89h12.4
6	dancr
7	dleu2
8	dlx6-as1
9	fendrr
10	gas5
11	gnas-as1
12	h19
13	hcp5
14	hotair
15	hotairm1
16	hottip
17	hoxa-as2
18	hoxa11-as
19	hoxd-as1
20	kcnq1ot1
21	linc00152
22	linc00342
23	linc00467
24	linc00473
25	linc00617
26	malat1
27	meg3
28	miat
29	mir155hg
30	neat1
31	pvt1
32	sbf2-as1
33	snhg1
34	snhg15
35	snhg16
36	snhg3
37	snhg5
38	tincr
39	tp73-as1
40	traf3ip2-as1
41	tug1
42	xist
43	zfas1
44	znrd1-as1

## Sheet: miRNA
ID_miRNA	Name_miRNA
1	hsa-let-7a-5p
2	hsa-let-7b-5p
3	hsa-let-7c-5p
4	hsa-let-7d-5p
5	hsa-let-7e-5p
6	hsa-let-7f-5p
7	hsa-miR-15a-5p
8	hsa-miR-16-5p
9	hsa-miR-17-5p
10	hsa-miR-18a-5p
11	hsa-miR-19a-3p
12	hsa-miR-19b-3p
13	hsa-miR-20a-5p
14	hsa-miR-21-5p
15	hsa-miR-22-3p
16	hsa-miR-23a-3p
17	hsa-miR-24-3p
18	hsa-miR-25-3p
19	hsa-miR-26a-5p
20	hsa-miR-26b-5p
21	hsa-miR-27a-3p
22	hsa-miR-28-5p
23	hsa-miR-29a-3p
24	hsa-miR-30a-5p
25	hsa-miR-31-5p
26	hsa-miR-32-5p
27	hsa-miR-33a-5p
28	hsa-miR-92a-3p
29	hsa-miR-93-5p
30	hsa-miR-96-5p
31	hsa-miR-98-5p
32	hsa-miR-101-3p
33	hsa-miR-29b-3p
34	hsa-miR-103a-3p
35	hsa-miR-106a-5p
36	hsa-miR-107
37	hsa-miR-192-5p
38	hsa-miR-196a-5p
39	hsa-miR-197-3p
40	hsa-miR-129-5p
41	hsa-miR-148a-3p
42	hsa-miR-30c-5p
43	hsa-miR-30d-5p
44	hsa-miR-139-5p
45	hsa-miR-7-5p
46	hsa-miR-10a-5p
47	hsa-miR-10b-5p
48	hsa-miR-34a-5p
49	hsa-miR-181a-5p
50	hsa-miR-181b-5p
51	hsa-miR-181c-5p
52	hsa-miR-182-5p
53	hsa-miR-183-5p
54	hsa-miR-187-3p
55	hsa-miR-204-5p
56	hsa-miR-205-5p
57	hsa-miR-210-3p
58	hsa-miR-211-5p
59	hsa-miR-212-3p
60	hsa-miR-214-3p
61	hsa-miR-215-5p
62	hsa-miR-216a-5p
63	hsa-miR-217
64	hsa-miR-218-5p
65	hsa-miR-219a-5p
66	hsa-miR-221-3p
67	hsa-miR-222-3p
68	hsa-miR-223-3p
69	hsa-miR-224-5p
70	hsa-miR-200b-3p
71	hsa-let-7g-5p
72	hsa-let-7i-5p
73	hsa-miR-15b-5p
74	hsa-miR-23b-3p
75	hsa-miR-27b-3p
76	hsa-miR-30b-5p
77	hsa-miR-122-5p
78	hsa-miR-124-3p
79	hsa-miR-125b-5p
80	hsa-miR-128-3p
81	hsa-miR-130a-3p
82	hsa-miR-132-3p
83	hsa-miR-135a-5p
84	hsa-miR-137
85	hsa-miR-138-5p
86	hsa-miR-140-5p
87	hsa-miR-141-3p
88	hsa-miR-142-3p
89	hsa-miR-143-3p
90	hsa-miR-144-3p
91	hsa-miR-145-5p
92	hsa-miR-152-3p
93	hsa-miR-153-3p
94	hsa-miR-191-5p
95	hsa-miR-9-5p
96	hsa-miR-125a-5p
97	hsa-miR-126-3p
98	hsa-miR-134-5p
99	hsa-miR-136-5p
100	hsa-miR-146a-5p
101	hsa-miR-149-5p
102	hsa-miR-150-5p
103	hsa-miR-154-5p
104	hsa-miR-185-5p
105	hsa-miR-186-5p
106	hsa-miR-190a-5p
107	hsa-miR-193a-3p
108	hsa-miR-194-5p
109	hsa-miR-195-5p
110	hsa-miR-206
111	hsa-miR-320a
112	hsa-miR-200c-3p
113	hsa-miR-155-5p
114	hsa-miR-106b-5p
115	hsa-miR-29c-3p
116	hsa-miR-200a-3p
117	hsa-miR-302a-3p
118	hsa-miR-34c-5p
119	hsa-miR-301a-3p
120	hsa-miR-130b-3p
121	hsa-miR-30e-5p
122	hsa-miR-361-5p
123	hsa-miR-363-3p
124	hsa-miR-365a-3p
125	hsa-miR-302b-3p
126	hsa-miR-302c-3p
127	hsa-miR-302d-3p
128	hsa-miR-367-3p
129	hsa-miR-376c-3p
130	hsa-miR-370-3p
131	hsa-miR-372-3p
132	hsa-miR-373-3p
133	hsa-miR-374a-5p
134	hsa-miR-376a-3p
135	hsa-miR-377-3p
136	hsa-miR-379-5p
137	hsa-miR-381-3p
138	hsa-miR-382-5p
139	hsa-miR-383-5p
140	hsa-miR-340-5p
141	hsa-miR-328-3p
142	hsa-miR-342-3p
143	hsa-miR-326
144	hsa-miR-135b-5p
145	hsa-miR-148b-3p
146	hsa-miR-324-5p
147	hsa-miR-338-3p
148	hsa-miR-339-5p
149	hsa-miR-335-5p
150	hsa-miR-346
151	hsa-miR-196b-5p
152	hsa-miR-422a
153	hsa-miR-424-5p
154	hsa-miR-425-5p
155	hsa-miR-18b-5p
156	hsa-miR-20b-5p
157	hsa-miR-448
158	hsa-miR-429
159	hsa-miR-449a
160	hsa-miR-451a
161	hsa-miR-485-5p
162	hsa-miR-486-5p
163	hsa-miR-490-3p
164	hsa-miR-491-5p
165	hsa-miR-146b-5p
166	hsa-miR-202-3p
167	hsa-miR-494-3p
168	hsa-miR-495-3p
169	hsa-miR-193b-3p
170	hsa-miR-497-5p
171	hsa-miR-181d-5p
172	hsa-miR-520e
173	hsa-miR-520a-3p
174	hsa-miR-520b
175	hsa-miR-520c-3p
176	hsa-miR-499a-5p
177	hsa-miR-503-5p
178	hsa-miR-505-3p
179	hsa-miR-506-3p
180	hsa-miR-455-5p
181	hsa-miR-544a
182	hsa-miR-92b-3p
183	hsa-miR-590-5p
184	hsa-miR-613
185	hsa-miR-615-3p
186	hsa-miR-449b-5p
187	hsa-miR-421
188	hsa-miR-542-3p
189	hsa-miR-320b
190	hsa-miR-320c
191	hsa-miR-1271-5p
192	hsa-miR-454-3p
193	hsa-miR-378d
194	hsa-miR-761
195	hsa-miR-300
196	hsa-miR-708-5p
197	hsa-miR-190b
198	hsa-miR-873-5p
199	hsa-miR-374b-5p
200	hsa-miR-216b-5p
201	hsa-miR-1297
202	hsa-miR-320d
203	hsa-miR-378b
204	hsa-miR-378c
205	hsa-miR-4306
206	hsa-miR-378e
207	hsa-miR-378f
208	hsa-miR-4458
209	hsa-miR-378h
210	hsa-miR-4500
211	hsa-miR-378i

## Sheet: lncRNA-miRNA
ID_LMPairs	ID_lncRNA	ID_miRNA
1	1	41
2	1	92
3	1	125
4	1	126
5	1	132
6	1	145
7	1	164
8	1	172
9	1	173
10	1	174
11	2	10
12	2	155
13	3	17
14	3	41
15	3	49
16	3	50
17	3	51
18	3	62
19	3	64
20	3	81
21	3	92
22	3	119
23	3	120
24	3	145
25	3	163
26	3	171
27	3	192
28	4	1
29	4	2
30	4	3
31	4	4
32	4	5
33	4	6
34	4	31
35	4	46
36	4	47
37	4	49
38	4	50
39	4	51
40	4	71
41	4	72
42	4	77
43	4	148
44	4	171
45	5	7
46	5	8
47	5	9
48	5	12
49	5	13
50	5	24
51	5	29
52	5	34
53	5	35
54	5	36
55	5	42
56	5	43
57	5	45
58	5	46
59	5	47
60	5	49
61	5	50
62	5	51
63	5	56
64	5	68
65	5	73
66	5	76
67	5	80
68	5	93
69	5	109
70	5	113
71	5	114
72	5	121
73	5	144
74	5	170
75	5	171
76	6	27
77	6	62
78	6	83
79	6	144
80	7	43
81	8	8
82	8	87
83	8	116
84	8	201
85	9	8
86	9	10
87	9	17
88	9	60
89	9	73
90	9	109
91	9	170
92	9	187
93	10	10
94	10	16
95	10	19
96	10	20
97	10	23
98	10	33
99	10	38
100	10	56
101	10	66
102	10	67
103	10	68
104	10	74
105	10	80
106	10	83
107	10	84
108	10	99
109	10	115
110	10	122
111	10	133
112	10	144
113	10	150
114	10	151
115	10	155
116	10	161
117	10	181
118	10	198
119	10	199
120	10	201
121	11	17
122	11	48
123	11	118
124	11	159
125	11	186
126	12	9
127	12	10
128	12	11
129	12	12
130	12	13
131	12	23
132	12	29
133	12	33
134	12	34
135	12	35
136	12	36
137	12	38
138	12	41
139	12	81
140	12	85
141	12	86
142	12	92
143	12	107
144	12	108
145	12	114
146	12	115
147	12	119
148	12	120
149	12	130
150	12	145
151	12	148
152	12	151
153	12	155
154	12	156
155	12	164
156	12	169
157	12	192
158	12	200
159	13	23
160	13	33
161	14	9
162	14	11
163	14	12
164	14	13
165	14	29
166	14	35
167	14	41
168	14	60
169	14	63
170	14	66
171	14	67
172	14	81
173	14	92
174	14	110
175	14	114
176	14	119
177	14	120
178	14	143
179	14	145
180	14	156
181	14	184
182	14	192
183	14	194
184	15	34
185	15	36
186	15	40
187	15	41
188	15	84
189	15	145
190	16	185
191	17	9
192	17	13
193	17	29
194	17	35
195	17	114
196	17	156
197	18	1
198	18	2
199	18	3
200	18	4
201	18	5
202	18	6
203	18	31
204	18	41
205	18	60
206	18	68
207	18	71
208	18	78
209	18	145
210	19	9
211	19	11
212	19	12
213	19	13
214	19	29
215	19	35
216	19	52
217	19	114
218	19	156
219	19	187
220	20	1
221	20	2
222	20	3
223	20	4
224	20	5
225	20	6
226	20	10
227	20	11
228	20	12
229	20	17
230	20	21
231	20	23
232	20	31
233	20	33
234	20	34
235	20	36
236	20	39
237	20	41
238	20	45
239	20	48
240	20	53
241	20	54
242	20	55
243	20	58
244	20	60
245	20	71
246	20	72
247	20	75
248	20	78
249	20	79
250	20	80
251	20	81
252	20	85
253	20	86
254	20	91
255	20	92
256	20	93
257	20	96
258	20	98
259	20	100
260	20	101
261	20	115
262	20	118
263	20	119
264	20	120
265	20	129
266	20	130
267	20	135
268	20	139
269	20	141
270	20	143
271	20	145
272	20	147
273	20	148
274	20	149
275	20	150
276	20	154
277	20	155
278	20	159
279	20	162
280	20	163
281	20	164
282	20	165
283	20	176
284	20	179
285	20	186
286	20	187
287	20	192
288	20	200
289	20	208
290	21	34
291	21	36
292	21	113
293	21	169
294	22	11
295	23	10
296	24	7
297	24	8
298	24	16
299	24	57
300	24	73
301	24	109
302	24	170
303	25	10
304	25	155
305	26	9
306	26	13
307	26	15
308	26	16
309	26	18
310	26	19
311	26	20
312	26	22
313	26	24
314	26	26
315	26	28
316	26	29
317	26	30
318	26	32
319	26	35
320	26	39
321	26	40
322	26	42
323	26	43
324	26	49
325	26	50
326	26	51
327	26	55
328	26	56
329	26	58
330	26	62
331	26	63
332	26	69
333	26	70
334	26	74
335	26	76
336	26	78
337	26	83
338	26	86
339	26	87
340	26	88
341	26	89
342	26	90
343	26	91
344	26	100
345	26	101
346	26	102
347	26	103
348	26	104
349	26	108
350	26	110
351	26	111
352	26	112
353	26	113
354	26	114
355	26	116
356	26	121
357	26	123
358	26	128
359	26	130
360	26	133
361	26	134
362	26	139
363	26	141
364	26	144
365	26	147
366	26	150
367	26	152
368	26	154
369	26	156
370	26	158
371	26	161
372	26	164
373	26	165
374	26	166
375	26	167
376	26	171
377	26	176
378	26	177
379	26	179
380	26	180
381	26	181
382	26	182
383	26	184
384	26	189
385	26	190
386	26	191
387	26	193
388	26	196
389	26	198
390	26	199
391	26	200
392	26	201
393	26	202
394	26	203
395	26	204
396	26	205
397	26	206
398	26	207
399	26	209
400	26	211
401	27	45
402	27	65
403	27	122
404	28	23
405	28	33
406	28	102
407	28	115
408	29	68
409	29	113
410	30	1
411	30	2
412	30	3
413	30	4
414	30	5
415	30	6
416	30	15
417	30	21
418	30	22
419	30	31
420	30	32
421	30	34
422	30	36
423	30	40
424	30	46
425	30	47
426	30	48
427	30	49
428	30	50
429	30	51
430	30	55
431	30	58
432	30	60
433	30	62
434	30	71
435	30	72
436	30	75
437	30	78
438	30	95
439	30	96
440	30	100
441	30	103
442	30	107
443	30	108
444	30	111
445	30	118
446	30	124
447	30	130
448	30	135
449	30	136
450	30	139
451	30	142
452	30	146
453	30	148
454	30	149
455	30	154
456	30	159
457	30	165
458	30	166
459	30	168
460	30	169
461	30	171
462	30	176
463	30	177
464	30	178
465	30	179
466	30	186
467	30	189
468	30	190
469	30	194
470	30	196
471	30	202
472	30	208
473	30	210
474	31	7
475	31	8
476	31	9
477	31	13
478	31	17
479	31	29
480	31	35
481	31	73
482	31	80
483	31	105
484	31	106
485	31	109
486	31	114
487	31	124
488	31	153
489	31	156
490	31	170
491	31	181
492	31	197
493	32	86
494	32	147
495	33	7
496	33	8
497	33	10
498	33	14
499	33	32
500	33	52
501	33	73
502	33	84
503	33	86
504	33	91
505	33	103
506	33	109
507	33	134
508	33	135
509	33	143
510	33	153
511	33	155
512	33	170
513	33	183
514	33	187
515	34	10
516	34	17
517	34	87
518	34	93
519	34	116
520	34	147
521	34	150
522	34	155
523	34	160
524	35	1
525	35	2
526	35	3
527	35	5
528	35	7
529	35	8
530	35	9
531	35	13
532	35	16
533	35	25
534	35	29
535	35	35
536	35	38
537	35	52
538	35	53
539	35	56
540	35	59
541	35	71
542	35	73
543	35	74
544	35	78
545	35	86
546	35	87
547	35	100
548	35	109
549	35	114
550	35	116
551	35	132
552	35	151
553	35	153
554	35	156
555	35	165
556	35	170
557	36	38
558	36	44
559	36	52
560	36	62
561	36	83
562	36	105
563	36	143
564	36	161
565	37	18
566	37	19
567	37	20
568	37	28
569	37	56
570	37	59
571	37	82
572	37	123
573	37	187
574	38	25
575	38	45
576	38	149
577	38	181
578	39	21
579	39	25
580	39	36
581	39	39
582	39	75
583	39	78
584	39	87
585	39	103
586	39	107
587	39	108
588	39	116
589	39	161
590	39	169
591	40	7
592	40	73
593	40	109
594	41	14
595	41	23
596	41	25
597	41	33
598	41	38
599	41	39
600	41	59
601	41	65
602	41	66
603	41	67
604	41	82
605	41	85
606	41	88
607	41	90
608	41	91
609	41	93
610	41	95
611	41	105
612	41	108
613	41	115
614	41	124
615	41	130
616	41	134
617	41	137
618	41	138
619	41	141
620	41	149
621	41	151
622	41	154
623	41	183
624	41	187
625	41	195
626	42	1
627	42	2
628	42	3
629	42	4
630	42	5
631	42	6
632	42	7
633	42	8
634	42	9
635	42	10
636	42	11
637	42	12
638	42	13
639	42	14
640	42	16
641	42	18
642	42	21
643	42	23
644	42	24
645	42	25
646	42	26
647	42	28
648	42	29
649	42	30
650	42	31
651	42	32
652	42	33
653	42	34
654	42	35
655	42	36
656	42	37
657	42	38
658	42	39
659	42	40
660	42	41
661	42	42
662	42	43
663	42	44
664	42	45
665	42	46
666	42	47
667	42	48
668	42	49
669	42	50
670	42	51
671	42	52
672	42	55
673	42	58
674	42	59
675	42	60
676	42	61
677	42	62
678	42	63
679	42	65
680	42	70
681	42	71
682	42	72
683	42	73
684	42	74
685	42	75
686	42	76
687	42	77
688	42	78
689	42	79
690	42	81
691	42	82
692	42	83
693	42	84
694	42	86
695	42	87
696	42	90
697	42	92
698	42	93
699	42	94
700	42	95
701	42	96
702	42	97
703	42	99
704	42	100
705	42	101
706	42	102
707	42	103
708	42	104
709	42	105
710	42	106
711	42	107
712	42	108
713	42	109
714	42	111
715	42	112
716	42	113
717	42	114
718	42	115
719	42	116
720	42	117
721	42	118
722	42	119
723	42	120
724	42	121
725	42	124
726	42	125
727	42	126
728	42	127
729	42	128
730	42	129
731	42	130
732	42	131
733	42	132
734	42	133
735	42	135
736	42	136
737	42	137
738	42	140
739	42	142
740	42	143
741	42	144
742	42	145
743	42	146
744	42	147
745	42	149
746	42	151
747	42	153
748	42	154
749	42	155
750	42	156
751	42	157
752	42	158
753	42	159
754	42	161
755	42	162
756	42	163
757	42	164
758	42	165
759	42	166
760	42	167
761	42	168
762	42	169
763	42	170
764	42	171
765	42	172
766	42	173
767	42	174
768	42	175
769	42	176
770	42	178
771	42	179
772	42	182
773	42	183
774	42	185
775	42	186
776	42	187
777	42	188
778	42	189
779	42	190
780	42	191
781	42	192
782	42	194
783	42	195
784	42	196
785	42	197
786	42	198
787	42	199
788	42	202
789	42	205
790	42	208
791	42	210
792	43	102
793	44	7
794	44	8
795	44	9
796	44	11
797	44	12
798	44	13
799	44	29
800	44	35
801	44	41
802	44	59
803	44	73
804	44	79
805	44	80
806	44	81
807	44	82
808	44	95
809	44	96
810	44	109
811	44	119
812	44	170
813	44	176
